# Supplementary material for: Study on Potential Differentially Expressed Genes in Idiopathic Pulmonary Fibrosis by Bioinformatics and Next-Generation Sequencing Data Analysis
Source: MDPI journal article supplement (doi:10.3390/biomedicines11123109), 2023-11-21
Supplement: s1 [file s1]

**Table S1** The statistical metrics for key differentially expressed genes (DEGs).

| Gene Symbol | logFC    | pValue   | adj.P.Val | tvalue   | Regulation | Gene Name                                                  |
|-------------|----------|----------|-----------|----------|------------|------------------------------------------------------------|
| SLCO1A2     | 3.726667 | 2.10E-11 | 3.29E-09  | 6.699037 | Up         | solute carrier organic anion transporter family member 1A2 |
| OLFM4       | 2.443401 | 2.03E-08 | 8.58E-07  | 5.609154 | Up         | olfactomedin 4                                             |
| DEFA4       | 2.288422 | 5.11E-06 | 8.17E-05  | 4.560317 | Up         | defensin alpha 4                                           |
| NECAB1      | 2.277329 | 2.62E-14 | 1.41E-11  | 7.615939 | Up         | N-terminal EF-hand calcium binding protein 1               |
| ITLN2       | 2.233514 | 3.34E-08 | 1.27E-06  | 5.522634 | Up         | intelectin 2                                               |
| RTKN2       | 2.202055 | 9.80E-12 | 1.82E-09  | 6.809355 | Up         | rotekkin 2                                                 |
| CYP1A1      | 1.958708 | 4.84E-07 | 1.18E-05  | 5.032612 | Up         | cytochrome P450 family 1 subfamily A member 1              |
| HHIP        | 1.861403 | 4.50E-12 | 9.54E-10  | 6.920567 | Up         | hedgehog interacting protein                               |
| AGTR2       | 1.838389 | 7.27E-06 | 0.000109  | 4.485482 | Up         | angiotensin II receptor type 2                             |
| CHI3L2      | 1.70625  | 1.37E-10 | 1.45E-08  | 6.419584 | Up         | chitinase 3 like 2                                         |
| MAP3K15     | 1.68578  | 1.27E-07 | 3.94E-06  | 5.282487 | Up         | mitogen-activated protein kinase kinase kinase 15          |
| ORM2        | 1.670216 | 8.37E-05 | 0.000773  | 3.933642 | Up         | orosomucoid 2                                              |
| PRTN3       | 1.66482  | 2.87E-05 | 0.000321  | 4.183191 | Up         | proteinase 3                                               |
| WFDC12      | 1.653406 | 0.000256 | 0.001849  | 3.656259 | Up         | WAP four-disulfide core domain 12                          |
| DEFA3       | 1.623825 | 0.00012  | 0.001035  | 3.846044 | Up         | defensin alpha 3                                           |
| GALNT13     | 1.609443 | 5.25E-07 | 1.27E-05  | 5.016917 | Up         | polypeptide N-acetylgalactosaminyltransferase 13           |
| RNASE3      | 1.551794 | 4.13E-06 | 6.91E-05  | 4.604856 | Up         | ribonuclease A family member 3                             |
| SCN1A       | 1.545567 | 3.63E-08 | 1.35E-06  | 5.508046 | Up         | sodium voltage-gated channel alpha subunit 1               |
| HSD17B6     | 1.544643 | 3.23E-11 | 4.62E-09  | 6.635692 | Up         | hydroxysteroid 17-beta dehydrogenase 6                     |
| PI3         | 1.53004  | 1.67E-05 | 0.000209  | 4.304671 | Up         | peptidase inhibitor 3                                      |
| CX3CR1      | 1.520273 | 5.68E-09 | 2.92E-07  | 5.826041 | Up         | C-X3-C motif chemokine receptor 1                          |
| S100A12     | 1.511955 | 5.94E-06 | 9.20E-05  | 4.528661 | Up         | S100 calcium binding protein A12                           |
| TUBB1       | 1.501628 | 1.23E-05 | 0.000164  | 4.372072 | Up         | tubulin beta 1 class VI                                    |
| CRTAC1      | 1.498618 | 9.52E-08 | 3.10E-06  | 5.335693 | Up         | cartilage acidic protein 1                                 |
| PROK2       | 1.49785  | 3.02E-06 | 5.40E-05  | 4.66956  | Up         | prokineticin 2                                             |
| CSF2        | 1.487492 | 2.80E-05 | 0.000314  | 4.189412 | Up         | colony stimulating factor 2                                |
| ALPP        | 1.479287 | 0.000107 | 0.000941  | 3.874387 | Up         | alkaline phosphatase, placental                            |
| CD177       | 1.469469 | 1.92E-05 | 0.000232  | 4.273978 | Up         | CD177 molecule                                             |
| ANKRD1      | 1.466629 | 0.000406 | 0.002657  | 3.536161 | Up         | ankyrin repeat domain 1                                    |
| CADM2       | 1.460814 | 4.48E-06 | 7.41E-05  | 4.587788 | Up         | cell adhesion molecule 2                                   |
| AGRP        | 1.459043 | 2.50E-06 | 4.63E-05  | 4.707972 | Up         | agouti related neuropeptide                                |
| SLC39A8     | 1.428325 | 1.79E-10 | 1.75E-08  | 6.378507 | Up         | solute carrier family 39 member 8                          |
| ADRA1A      | 1.412386 | 4.55E-08 | 1.65E-06  | 5.468233 | Up         | adrenoceptor alpha 1A                                      |
| MS4A3       | 1.407997 | 2.99E-05 | 0.000331  | 4.174463 | Up         | membrane spanning 4-domains A3                             |
| MS4A15      | 1.407407 | 5.67E-06 | 8.89E-05  | 4.538403 | Up         | membrane spanning 4-domains A15                            |
| ADCY8       | 1.403596 | 0.000467 | 0.00296   | 3.498719 | Up         | adenylate cyclase 8                                        |
| GGTLC1      | 1.398003 | 3.88E-06 | 6.61E-05  | 4.617923 | Up         | gamma-glutamyltransferase light chain 1                    |
| TRIM58      | 1.378761 | 1.32E-07 | 4.02E-06  | 5.276636 | Up         | tripartite motif containing 58                             |
| FGG         | 1.367873 | 0.002424 | 0.010844  | 3.032716 | Up         | fibrinogen gamma chain                                     |
| ZDHHC19     | 1.367468 | 2.35E-06 | 4.41E-05  | 4.720461 | Up         | zinc finger DHHC-type palmitoyltransferase 19              |

|         |          |          |          |          |    |                                                            |
|---------|----------|----------|----------|----------|----|------------------------------------------------------------|
| AGER    | 1.35608  | 1.29E-05 | 0.00017  | 4.362054 | Up | advanced glycosylation end-product specific receptor       |
| LHX9    | 1.348205 | 0.000346 | 0.002357 | 3.578126 | Up | LIM homeobox 9                                             |
| PF4     | 1.34113  | 0.000361 | 0.002434 | 3.566921 | Up | platelet factor 4                                          |
| FFAR2   | 1.340923 | 2.23E-05 | 0.000261 | 4.24086  | Up | free fatty acid receptor 2                                 |
| SERTM1  | 1.326803 | 0.000187 | 0.001436 | 3.736505 | Up | serine rich and transmembrane domain containing 1          |
| MGAM2   | 1.325326 | 6.78E-05 | 0.000651 | 3.983855 | Up | maltase-glucoamylase 2 (putative)                          |
| ORM1    | 1.305666 | 0.000245 | 0.001782 | 3.667932 | Up | orosomucoid 1                                              |
| GP1BA   | 1.298681 | 3.29E-06 | 5.78E-05 | 4.651848 | Up | glycoprotein Ib platelet subunit alpha                     |
| MPO     | 1.272553 | 1.98E-06 | 3.85E-05 | 4.755188 | Up | myeloperoxidase                                            |
| CD5L    | 1.268611 | 1.46E-05 | 0.000188 | 4.333999 | Up | CD5 molecule like                                          |
| SLCO4C1 | 1.252787 | 3.60E-06 | 6.23E-05 | 4.633043 | Up | solute carrier organic anion transporter family member 4C1 |
| GATD3   | 1.246426 | 0.011314 | 0.036418 | 2.532863 | Up | glutamine amidotransferase class 1 domain containing 3     |
| SH3GL2  | 1.235838 | 1.59E-05 | 0.000201 | 4.315327 | Up | SH3 domain containing GRB2 like 2, endophilin A1           |
| ADGRE1  | 1.233669 | 9.10E-07 | 2.00E-05 | 4.91025  | Up | adhesion G protein-coupled receptor E1                     |
| RS1     | 1.223036 | 0.000866 | 0.004794 | 3.330696 | Up | retinoschisin 1                                            |
| HMGCS2  | 1.206207 | 0.012077 | 0.038444 | 2.509883 | Up | 3-hydroxy-3-methylglutaryl-CoA synthase 2                  |
| SLC5A9  | 1.189442 | 5.23E-05 | 0.000522 | 4.045058 | Up | solute carrier family 5 member 9                           |
| RXFP1   | 1.188223 | 1.01E-06 | 2.19E-05 | 4.88954  | Up | relaxin family peptide receptor 1                          |
| ITGA2B  | 1.183783 | 3.83E-07 | 9.67E-06 | 5.077144 | Up | integrin subunit alpha 2b                                  |
| SYT15B  | 1.183499 | 4.03E-08 | 1.49E-06 | 5.489494 | Up | synaptotagmin 15B                                          |
| F11     | 1.175516 | 0.00059  | 0.003553 | 3.436074 | Up | coagulation factor XI                                      |
| S100A8  | 1.175054 | 2.05E-05 | 0.000245 | 4.25894  | Up | S100 calcium binding protein A8                            |
| SFTPA2  | 1.174217 | 3.72E-05 | 0.000399 | 4.123997 | Up | surfactant protein A2                                      |
| CHRM1   | 1.168264 | 0.000602 | 0.003611 | 3.430529 | Up | cholinergic receptor muscarinic 1                          |
| FAM167A | 1.165267 | 5.47E-07 | 1.29E-05 | 5.008966 | Up | family with sequence similarity 167 member A               |
| PGLYRP1 | 1.158301 | 0.000848 | 0.004718 | 3.33673  | Up | peptidoglycan recognition protein 1                        |
| BRINP1  | 1.157452 | 3.24E-05 | 0.000355 | 4.155749 | Up | BMP/retinoic acid inducible neural specific 1              |
| SNX22   | 1.157308 | 8.71E-06 | 0.000126 | 4.446869 | Up | sorting nexin 22                                           |
| ZBED2   | 1.155994 | 1.64E-05 | 0.000205 | 4.309611 | Up | zinc finger BED-type containing 2                          |
| GPM6A   | 1.149957 | 2.76E-08 | 1.09E-06 | 5.556184 | Up | glycoprotein M6A                                           |
| GRIA1   | 1.141825 | 1.19E-05 | 0.00016  | 4.378714 | Up | glutamate ionotropic receptor AMPA type subunit 1          |
| NPR3    | 1.121107 | 3.51E-08 | 1.32E-06 | 5.513641 | Up | natriuretic peptide receptor 3                             |
| RBP2    | 1.120952 | 0.000784 | 0.004435 | 3.358291 | Up | retinol binding protein 2                                  |
| MUCL3   | 1.111579 | 0.001469 | 0.00731  | 3.180675 | Up | mucin like 3                                               |
| VEGFD   | 1.096482 | 1.01E-06 | 2.18E-05 | 4.890571 | Up | vascular endothelial growth factor D                       |
| CHRM2   | 1.096233 | 0.001935 | 0.009123 | 3.100067 | Up | cholinergic receptor muscarinic 2                          |
| MPIG6B  | 1.086753 | 2.76E-06 | 5.04E-05 | 4.688238 | Up | megakaryocyte and platelet inhibitory receptor G6b         |
| CXCL11  | 1.085868 | 0.00068  | 0.003959 | 3.397455 | Up | C-X-C motif chemokine ligand 11                            |
| LAMP3   | 1.085091 | 3.73E-05 | 0.000399 | 4.123524 | Up | lysosomal associated membrane protein 3                    |
| GPR15   | 1.080741 | 0.002209 | 0.010136 | 3.06053  | Up | G protein-coupled receptor 15                              |
| SHISA2  | 1.073802 | 1.31E-07 | 4.01E-06 | 5.277387 | Up | shisa family member 2                                      |
| KCTD16  | 1.070257 | 2.33E-07 | 6.30E-06 | 5.17049  | Up | potassium channel tetramerization domain containing 16     |
| KLRG2   | 1.069203 | 0.000321 | 0.002218 | 3.597377 | Up | killer cell lectin like receptor G2                        |

|         |          |          |          |          |    |                                                               |
|---------|----------|----------|----------|----------|----|---------------------------------------------------------------|
| IL1A    | 1.064859 | 0.00019  | 0.001456 | 3.732112 | Up | interleukin 1 alpha                                           |
| LILRA1  | 1.053918 | 1.80E-07 | 5.17E-06 | 5.218657 | Up | leukocyte immunoglobulin like receptor A1                     |
| ND6     | 1.049081 | 7.88E-08 | 2.63E-06 | 5.3698   | Up | NADH dehydrogenase subunit 6                                  |
| CBS     | 1.048011 | 3.71E-05 | 0.000398 | 4.125074 | Up | cystathionine beta-synthase                                   |
| CLDN18  | 1.047537 | 0.002946 | 0.012634 | 2.973298 | Up | claudin 18                                                    |
| WNT7A   | 1.046829 | 9.19E-06 | 0.00013  | 4.435451 | Up | Wnt family member 7A                                          |
| NPFFR1  | 1.04173  | 5.36E-06 | 8.47E-05 | 4.550296 | Up | neuropeptide FF receptor 1                                    |
| NFE2    | 1.035791 | 1.64E-05 | 0.000205 | 4.308769 | Up | nuclear factor, erythroid 2                                   |
| SFTPA1  | 1.033603 | 0.000353 | 0.00239  | 3.57294  | Up | surfactant protein A1                                         |
| BPI     | 1.031272 | 0.000371 | 0.002471 | 3.560063 | Up | bactericidal permeability increasing protein                  |
| BTNL8   | 1.030299 | 0.000103 | 0.000911 | 3.883508 | Up | butyrophilin like 8                                           |
| SSTR1   | 1.027973 | 4.49E-06 | 7.41E-05 | 4.587376 | Up | somatostatin receptor 1                                       |
| PRKG2   | 1.027838 | 1.25E-06 | 2.63E-05 | 4.847774 | Up | protein kinase cGMP-dependent 2                               |
| AQP4    | 1.022337 | 1.03E-05 | 0.000142 | 4.410583 | Up | aquaporin 4                                                   |
| USP44   | 1.022328 | 5.09E-08 | 1.82E-06 | 5.448026 | Up | ubiquitin specific peptidase 44                               |
| PLA2G4E | 1.014528 | 0.003251 | 0.013626 | 2.942972 | Up | phospholipase A2 group IVE                                    |
| FOLR3   | 1.013648 | 0.000452 | 0.00289  | 3.507673 | Up | folate receptor gamma                                         |
| SCD     | 1.01282  | 1.52E-05 | 0.000194 | 4.326413 | Up | stearoyl-CoA desaturase                                       |
| SLC19A3 | 1.010289 | 7.10E-07 | 1.62E-05 | 4.958671 | Up | solute carrier family 19 member 3                             |
| LRP2    | 1.006373 | 0.000129 | 0.001095 | 3.828211 | Up | LDL receptor related protein 2                                |
| TRIM71  | 1.005932 | 1.09E-05 | 0.000149 | 4.39922  | Up | tripartite motif containing 71                                |
| SLC6A4  | 1.005045 | 0.015722 | 0.04737  | 2.415306 | Up | solute carrier family 6 member 4                              |
| MME     | 1.003156 | 4.50E-06 | 7.41E-05 | 4.586762 | Up | membrane metalloendopeptidase                                 |
| BDNF    | 1.001912 | 9.01E-06 | 0.000128 | 4.439743 | Up | brain derived neurotrophic factor                             |
| ZNF385B | 0.995591 | 1.91E-05 | 0.000232 | 4.274887 | Up | zinc finger protein 385B                                      |
| RNF182  | 0.995496 | 3.10E-09 | 1.81E-07 | 5.926288 | Up | ring finger protein 182                                       |
| MYRF    | 0.974509 | 0.000297 | 0.002093 | 3.61779  | Up | myelin regulatory factor                                      |
| SEC14L4 | 0.974443 | 0.000178 | 0.001392 | 3.747686 | Up | SEC14 like lipid binding 4                                    |
| NRGN    | 0.964971 | 2.20E-08 | 9.13E-07 | 5.595451 | Up | neurogranin                                                   |
| GCOM1   | 0.964481 | 1.87E-05 | 0.000227 | 4.280406 | Up | GCOM1, MYZAP-POLR2M combined locus                            |
| GFI1B   | 0.96123  | 0.000201 | 0.001523 | 3.718067 | Up | growth factor independent 1B transcriptional repressor        |
| PEBP4   | 0.959036 | 0.000586 | 0.003539 | 3.437835 | Up | phosphatidylethanolamine binding protein 4                    |
| LRRN3   | 0.956791 | 6.85E-07 | 1.57E-05 | 4.965673 | Up | leucine rich repeat neuronal 3                                |
| CXCL10  | 0.956734 | 0.001413 | 0.007093 | 3.191992 | Up | C-X-C motif chemokine ligand 10                               |
| ODAM    | 0.953708 | 0.003364 | 0.014006 | 2.932395 | Up | odontogenic, ameloblast associated                            |
| CPB2    | 0.948363 | 0.014321 | 0.044012 | 2.449109 | Up | carboxypeptidase B2                                           |
| RPH3A   | 0.945528 | 0.001046 | 0.005552 | 3.277886 | Up | rabphilin 3A                                                  |
| KCNS1   | 0.937449 | 0.000977 | 0.005265 | 3.297088 | Up | potassium voltage-gated channel modifier subfamily S member 1 |
| ANGPTL7 | 0.93254  | 0.000471 | 0.002977 | 3.496537 | Up | angiopoietin like 7                                           |
| ASPG    | 0.93217  | 0.001952 | 0.009174 | 3.097393 | Up | asparaginase                                                  |
| TMEM97  | 0.931267 | 1.29E-07 | 3.98E-06 | 5.279651 | Up | transmembrane protein 97                                      |
| PTCRA   | 0.929636 | 8.68E-05 | 0.000797 | 3.924732 | Up | pre T cell antigen receptor alpha                             |
| CASP5   | 0.928596 | 0.000171 | 0.001348 | 3.759014 | Up | caspase 5                                                     |

|          |          |          |          |          |    |                                                                                  |
|----------|----------|----------|----------|----------|----|----------------------------------------------------------------------------------|
| RIMKLA   | 0.924486 | 5.09E-05 | 0.00051  | 4.051534 | Up | ribosomal modification protein rimK like family member A                         |
| LGI3     | 0.917561 | 0.003541 | 0.014568 | 2.916379 | Up | leucine rich repeat LGI family member 3                                          |
| CCL8     | 0.906363 | 0.000972 | 0.005248 | 3.298642 | Up | C-C motif chemokine ligand 8                                                     |
| PRODH    | 0.901718 | 0.006419 | 0.023233 | 2.725598 | Up | proline dehydrogenase 1                                                          |
| CLTRN    | 0.90112  | 8.72E-06 | 0.000126 | 4.446726 | Up | collectrin, amino acid transport regulator                                       |
| TMEM100  | 0.897363 | 0.000682 | 0.003969 | 3.396709 | Up | transmembrane protein 100                                                        |
| P2RY1    | 0.897328 | 3.98E-08 | 1.48E-06 | 5.491945 | Up | purinergic receptor P2Y1                                                         |
| RNASE2   | 0.896564 | 0.000158 | 0.001275 | 3.777498 | Up | ribonuclease A family member 2                                                   |
| CSPG5    | 0.896384 | 0.00025  | 0.001813 | 3.662563 | Up | chondroitin sulfate proteoglycan 5                                               |
| LRRTM2   | 0.892735 | 9.00E-05 | 0.000822 | 3.916088 | Up | leucine rich repeat transmembrane neuronal 2                                     |
| GPRIN2   | 0.884966 | 0.000122 | 0.001046 | 3.842564 | Up | G protein regulated inducer of neurite outgrowth 2                               |
| LRRN4    | 0.882641 | 0.0008   | 0.004506 | 3.352731 | Up | leucine rich repeat neuronal 4                                                   |
| VEPH1    | 0.881795 | 0.000354 | 0.002394 | 3.572108 | Up | ventricular zone expressed PH domain containing 1                                |
| SIGLEC11 | 0.879986 | 7.36E-06 | 0.00011  | 4.483037 | Up | sialic acid binding Ig like lectin 11                                            |
| FCGR3B   | 0.87501  | 0.000743 | 0.004256 | 3.373345 | Up | Fc gamma receptor IIIb                                                           |
| S100A9   | 0.874918 | 0.000228 | 0.001691 | 3.685291 | Up | S100 calcium binding protein A9                                                  |
| NPY1R    | 0.874152 | 0.000165 | 0.001315 | 3.766824 | Up | neuropeptide Y receptor Y1                                                       |
| MARCKS   | 0.872521 | 5.59E-17 | 2.10E-13 | 8.373601 | Up | myristoylated alanine rich protein kinase C substrate                            |
| MSMO1    | 0.867924 | 6.55E-07 | 1.51E-05 | 4.974255 | Up | methylsterol monooxygenase 1                                                     |
| IL1B     | 0.867653 | 0.001451 | 0.007253 | 3.184213 | Up | interleukin 1 beta                                                               |
| CXCR1    | 0.858859 | 0.00228  | 0.010385 | 3.051141 | Up | C-X-C motif chemokine receptor 1                                                 |
| PLPPR1   | 0.856766 | 0.000128 | 0.00109  | 3.829712 | Up | phospholipid phosphatase related 1                                               |
| CXCR2    | 0.854949 | 0.000829 | 0.004647 | 3.342863 | Up | C-X-C motif chemokine receptor 2                                                 |
| GPIHBP1  | 0.853387 | 0.000977 | 0.005265 | 3.297183 | Up | glycosylphosphatidylinositol anchored high density lipoprotein binding protein 1 |
| SAMD5    | 0.852839 | 7.39E-09 | 3.68E-07 | 5.781753 | Up | sterile alpha motif domain containing 5                                          |
| AFF3     | 0.851292 | 2.04E-05 | 0.000244 | 4.260257 | Up | ALF transcription elongation factor 3                                            |
| PCDH9    | 0.847357 | 2.07E-06 | 3.98E-05 | 4.746011 | Up | protocadherin 9                                                                  |
| TNNT1    | 0.844116 | 0.005172 | 0.019606 | 2.796128 | Up | troponin T1, slow skeletal type                                                  |
| WNT3A    | 0.837416 | 0.000623 | 0.003703 | 3.421259 | Up | Wnt family member 3A                                                             |
| PARD6B   | 0.834916 | 4.50E-06 | 7.41E-05 | 4.58678  | Up | par-6 family cell polarity regulator beta                                        |
| TMED7    | 0.834798 | 4.69E-12 | 9.73E-10 | 6.914562 | Up | transmembrane p24 trafficking protein 7                                          |
| SP5      | 0.833924 | 0.000174 | 0.001364 | 3.754474 | Up | Sp5 transcription factor                                                         |
| CA4      | 0.830295 | 0.008543 | 0.029084 | 2.62983  | Up | carbonic anhydrase 4                                                             |
| APOH     | 0.827213 | 0.009119 | 0.030575 | 2.607569 | Up | apolipoprotein H                                                                 |
| SGCG     | 0.826508 | 0.000163 | 0.001296 | 3.771067 | Up | sarcoglycan gamma                                                                |
| FZD5     | 0.826035 | 1.52E-06 | 3.11E-05 | 4.808676 | Up | frizzled class receptor 5                                                        |
| CHRM3    | 0.820024 | 9.85E-06 | 0.000138 | 4.420411 | Up | cholinergic receptor muscarinic 3                                                |
| ACADL    | 0.81846  | 0.000177 | 0.001382 | 3.750386 | Up | acyl-CoA dehydrogenase long chain                                                |
| CTNND2   | 0.816462 | 0.000811 | 0.00456  | 3.349034 | Up | catenin delta 2                                                                  |
| BMI1     | 0.812293 | 1.17E-13 | 4.40E-11 | 7.420272 | Up | BMI1 proto-oncogene, polycomb ring finger                                        |
| PCARE    | 0.810876 | 0.003483 | 0.014384 | 2.921528 | Up | photoreceptor cilium actin regulator                                             |
| PRSS21   | 0.803212 | 0.000806 | 0.004536 | 3.350688 | Up | serine protease 21                                                               |

|          |          |          |          |          |    |                                                               |
|----------|----------|----------|----------|----------|----|---------------------------------------------------------------|
| CYP1B1   | 0.798853 | 3.85E-05 | 0.000409 | 4.116276 | Up | cytochrome P450 family 1 subfamily B member 1                 |
| FCN3     | 0.798379 | 0.00769  | 0.026769 | 2.665369 | Up | ficolin 3                                                     |
| TTN      | 0.797279 | 0.001445 | 0.00723  | 3.185423 | Up | titin                                                         |
| NIM1K    | 0.795122 | 1.40E-05 | 0.000182 | 4.343551 | Up | NIM1 serine/threonine protein kinase                          |
| SHISA3   | 0.794638 | 0.000456 | 0.002911 | 3.505181 | Up | shisa family member 3                                         |
| AZGP1    | 0.794084 | 0.012721 | 0.039943 | 2.491478 | Up | alpha-2-glycoprotein 1, zinc-binding                          |
| RIPPLY3  | 0.791581 | 0.002202 | 0.010113 | 3.061555 | Up | rippy transcriptional repressor 3                             |
| GPAM     | 0.790433 | 4.27E-08 | 1.57E-06 | 5.479205 | Up | glycerol-3-phosphate acyltransferase, mitochondrial           |
| STC1     | 0.789493 | 0.003952 | 0.015837 | 2.881995 | Up | stanniocalcin 1                                               |
| ABCA3    | 0.789374 | 0.002934 | 0.012599 | 2.974596 | Up | ATP binding cassette subfamily A member 3                     |
| ST8SIA6  | 0.789286 | 1.01E-05 | 0.00014  | 4.415074 | Up | ST8 alpha-N-acetyl-neuraminide alpha-2,8-sialyltransferase 6  |
| ELOVL3   | 0.788495 | 9.47E-07 | 2.06E-05 | 4.902332 | Up | ELOVL fatty acid elongase 3                                   |
| GBP4     | 0.788416 | 7.56E-06 | 0.000112 | 4.477412 | Up | guanylate binding protein 4                                   |
| CD36     | 0.788298 | 5.85E-06 | 9.09E-05 | 4.531857 | Up | CD36 molecule                                                 |
| HMGCS1   | 0.783582 | 5.48E-08 | 1.92E-06 | 5.435071 | Up | 3-hydroxy-3-methylglutaryl-CoA synthase 1                     |
| CACNA2D3 | 0.781809 | 5.27E-06 | 8.38E-05 | 4.553623 | Up | calcium voltage-gated channel auxiliary subunit alpha2delta 3 |
| CACNA2D2 | 0.781549 | 0.001999 | 0.009341 | 3.090379 | Up | calcium voltage-gated channel auxiliary subunit alpha2delta 2 |
| VSIG10   | 0.78052  | 1.26E-08 | 5.79E-07 | 5.691425 | Up | V-set and immunoglobulin domain containing 10                 |
| EDNRB    | 0.778024 | 1.06E-07 | 3.40E-06 | 5.315695 | Up | endothelin receptor type B                                    |
| MYZAP    | 0.77616  | 0.000496 | 0.003094 | 3.482787 | Up | myocardial zonula adherens protein                            |
| MGAM     | 0.775981 | 0.009242 | 0.030894 | 2.602952 | Up | maltase-glucoamylase                                          |
| MACROD2  | 0.775908 | 8.75E-05 | 0.000801 | 3.922996 | Up | mono-ADP ribosylhydrolase 2                                   |
| PLA2G3   | 0.773985 | 0.002128 | 0.009845 | 3.071696 | Up | phospholipase A2 group III                                    |
| BTNL9    | 0.772766 | 0.001294 | 0.006586 | 3.217415 | Up | butyrophilin like 9                                           |
| CEBPA    | 0.771134 | 2.38E-06 | 4.44E-05 | 4.717987 | Up | CCAAT enhancer binding protein alpha                          |
| C2orf88  | 0.770338 | 5.14E-06 | 8.20E-05 | 4.558987 | Up | chromosome 2 open reading frame 88                            |
| TRIB3    | 0.767008 | 7.54E-06 | 0.000112 | 4.477863 | Up | tribbles pseudokinase 3                                       |
| GPR18    | 0.765001 | 0.000238 | 0.001745 | 3.674611 | Up | G protein-coupled receptor 18                                 |
| SLC46A2  | 0.76484  | 0.005188 | 0.019659 | 2.795092 | Up | solute carrier family 46 member 2                             |
| CNTN6    | 0.76271  | 0.001003 | 0.005367 | 3.289799 | Up | contactin 6                                                   |
| FMO5     | 0.758959 | 0.001646 | 0.00801  | 3.147692 | Up | flavin containing dimethylaniline monooxygenase 5             |
| TNNC1    | 0.755531 | 0.002398 | 0.010762 | 3.035904 | Up | troponin C1, slow skeletal and cardiac type                   |
| ANGPT4   | 0.751626 | 0.000467 | 0.002958 | 3.499095 | Up | angiopoietin 4                                                |
| FAM167B  | 0.750142 | 1.85E-05 | 0.000226 | 4.281845 | Up | family with sequence similarity 167 member B                  |
| SPX      | 0.748505 | 3.79E-05 | 0.000404 | 4.120018 | Up | spexin hormone                                                |
| MAP3K21  | 0.746867 | 2.10E-07 | 5.83E-06 | 5.190158 | Up | mitogen-activated protein kinase kinase kinase 21             |
| SYNPO2L  | 0.746552 | 0.00651  | 0.023479 | 2.720908 | Up | synaptopodin 2 like                                           |
| ATP8A1   | 0.744997 | 2.61E-14 | 1.41E-11 | 7.616369 | Up | ATPase phospholipid transporting 8A1                          |
| CCDC141  | 0.744633 | 0.000609 | 0.003639 | 3.427564 | Up | coiled-coil domain containing 141                             |
| TPD52    | 0.741541 | 8.42E-11 | 9.90E-09 | 6.492983 | Up | tumor protein D52                                             |
| PCSK9    | 0.740276 | 0.005099 | 0.019383 | 2.800715 | Up | proprotein convertase subtilisin/kexin type 9                 |
| ACVR1C   | 0.740103 | 0.000204 | 0.001541 | 3.713882 | Up | activin A receptor type 1C                                    |
| SYT15    | 0.739694 | 2.43E-05 | 0.00028  | 4.221096 | Up | synaptotagmin 15                                              |

|          |          |          |          |          |    |                                                      |
|----------|----------|----------|----------|----------|----|------------------------------------------------------|
| TDRD9    | 0.737613 | 0.000126 | 0.001075 | 3.834021 | Up | tudor domain containing 9                            |
| RNF128   | 0.736962 | 9.84E-05 | 0.000878 | 3.894482 | Up | ring finger protein 128                              |
| SH2D1B   | 0.736718 | 0.002137 | 0.00987  | 3.070481 | Up | SH2 domain containing 1B                             |
| PRTG     | 0.734237 | 3.47E-09 | 2.01E-07 | 5.907804 | Up | protogenin                                           |
| P2RY13   | 0.727834 | 5.32E-06 | 8.44E-05 | 4.551785 | Up | purinergic receptor P2Y13                            |
| IER3IP1  | 0.726911 | 1.44E-13 | 5.27E-11 | 7.393027 | Up | immediate early response 3 interacting protein 1     |
| CDKL2    | 0.724664 | 0.000348 | 0.002365 | 3.576733 | Up | cyclin dependent kinase like 2                       |
| KITLG    | 0.72459  | 3.87E-10 | 3.27E-08 | 6.259261 | Up | KIT ligand                                           |
| GPD1     | 0.724563 | 0.005534 | 0.020646 | 2.77419  | Up | glycerol-3-phosphate dehydrogenase 1                 |
| CDH13    | 0.722869 | 7.64E-07 | 1.72E-05 | 4.944381 | Up | cadherin 13                                          |
| BATF2    | 0.718971 | 7.44E-05 | 0.000703 | 3.961684 | Up | basic leucine zipper ATF-like transcription factor 2 |
| DPP6     | 0.714059 | 0.010784 | 0.034952 | 2.549635 | Up | dipeptidyl peptidase like 6                          |
| ADARB2   | 0.713528 | 0.00297  | 0.012715 | 2.970817 | Up | adenosine deaminase RNA specific B2 (inactive)       |
| FFAR4    | 0.71313  | 0.003619 | 0.014805 | 2.909633 | Up | free fatty acid receptor 4                           |
| PTPRQ    | 0.712554 | 0.000478 | 0.003008 | 3.493019 | Up | protein tyrosine phosphatase receptor type Q         |
| FIBIN    | 0.712085 | 6.50E-05 | 0.000628 | 3.994042 | Up | fin bud initiation factor homolog                    |
| GPX3     | 0.712059 | 6.30E-05 | 0.000611 | 4.001106 | Up | glutathione peroxidase 3                             |
| AATK     | 0.711857 | 0.000127 | 0.001082 | 3.831912 | Up | apoptosis associated tyrosine kinase                 |
| FCGR1BP  | 0.708182 | 0.000147 | 0.001207 | 3.795893 | Up | Fc gamma receptor 1b, pseudogene                     |
| RAPGEF6  | 0.705717 | 4.23E-15 | 3.54E-12 | 7.847881 | Up | Rap guanine nucleotide exchange factor 6             |
| TLCD4    | 0.704769 | 2.18E-10 | 2.09E-08 | 6.34799  | Up | TLC domain containing 4                              |
| ETFRF1   | 0.704233 | 3.11E-15 | 3.12E-12 | 7.886485 | Up | electron transfer flavoprotein regulatory factor 1   |
| LTB      | 0.702138 | 0.00169  | 0.008171 | 3.139995 | Up | lymphotoxin beta                                     |
| LILRA2   | 0.701663 | 2.86E-05 | 0.00032  | 4.184232 | Up | leukocyte immunoglobulin like receptor A2            |
| FGF2     | 0.700257 | 1.32E-06 | 2.77E-05 | 4.836257 | Up | fibroblast growth factor 2                           |
| PDZD2    | 0.699065 | 1.23E-06 | 2.60E-05 | 4.851409 | Up | PDZ domain containing 2                              |
| ACKR4    | 0.697971 | 0.000147 | 0.001207 | 3.796077 | Up | atypical chemokine receptor 4                        |
| CSF3R    | 0.697927 | 0.001087 | 0.005734 | 3.266949 | Up | colony stimulating factor 3 receptor                 |
| MMP25    | 0.697396 | 0.005779 | 0.021418 | 2.760054 | Up | matrix metalloproteinase 25                          |
| NDUFC2   | 0.696935 | 8.92E-10 | 6.31E-08 | 6.127583 | Up | NADH:ubiquinone oxidoreductase subunit C2            |
| MAP1LC3C | 0.694668 | 0.004675 | 0.018091 | 2.828617 | Up | microtubule associated protein 1 light chain 3 gamma |
| SLC26A8  | 0.693861 | 0.009029 | 0.030348 | 2.610965 | Up | solute carrier family 26 member 8                    |
| TSPAN13  | 0.692795 | 2.27E-07 | 6.16E-06 | 5.175726 | Up | tetraspanin 13                                       |
| P3H2     | 0.692383 | 0.000102 | 0.000907 | 3.88485  | Up | prolyl 3-hydroxylase 2                               |
| FUT7     | 0.690073 | 0.000843 | 0.004698 | 3.338436 | Up | fucosyltransferase 7                                 |
| PLAG1    | 0.689541 | 6.10E-07 | 1.42E-05 | 4.988095 | Up | PLAG1 zinc finger                                    |
| FASN     | 0.687752 | 0.00086  | 0.004769 | 3.33271  | Up | fatty acid synthase                                  |
| UPK3B    | 0.687654 | 0.010296 | 0.033683 | 2.565716 | Up | uroplakin 3B                                         |
| PIK3AP1  | 0.687184 | 3.00E-06 | 5.37E-05 | 4.670853 | Up | phosphoinositide-3-kinase adaptor protein 1          |
| TMEM26   | 0.686086 | 0.00388  | 0.015604 | 2.887745 | Up | transmembrane protein 26                             |
| NKD1     | 0.682722 | 5.61E-05 | 0.000553 | 4.028723 | Up | NKD inhibitor of WNT signaling pathway 1             |
| ADH1B    | 0.682617 | 2.13E-07 | 5.87E-06 | 5.187407 | Up | alcohol dehydrogenase 1B (class I), beta polypeptide |
| STXBP6   | 0.681277 | 0.002791 | 0.012137 | 2.989864 | Up | syntrophin binding protein 6                         |

|         |          |          |          |          |    |                                                                       |
|---------|----------|----------|----------|----------|----|-----------------------------------------------------------------------|
| KBTBD7  | 0.681189 | 1.30E-12 | 3.50E-10 | 7.094075 | Up | kelch repeat and BTB domain containing 7                              |
| GPR160  | 0.680953 | 1.59E-08 | 7.05E-07 | 5.651493 | Up | G protein-coupled receptor 160                                        |
| FOXD1   | 0.680558 | 0.003459 | 0.014294 | 2.923738 | Up | forkhead box D1                                                       |
| SOWAHD  | 0.678898 | 0.000356 | 0.002406 | 3.570679 | Up | sosondowah ankyrin repeat domain family member D                      |
| SLC1A1  | 0.677852 | 0.000109 | 0.000958 | 3.869126 | Up | solute carrier family 1 member 1                                      |
| RXRG    | 0.677851 | 0.000506 | 0.003136 | 3.47759  | Up | retinoid X receptor gamma                                             |
| LILRA5  | 0.676704 | 0.000599 | 0.003593 | 3.432024 | Up | leukocyte immunoglobulin like receptor A5                             |
| SHH     | 0.676703 | 0.001211 | 0.006227 | 3.236268 | Up | sonic hedgehog signaling molecule                                     |
| DGAT2   | 0.673676 | 0.002014 | 0.009407 | 3.08811  | Up | diacylglycerol O-acyltransferase 2                                    |
| DACH1   | 0.673529 | 1.03E-07 | 3.32E-06 | 5.320711 | Up | dachshund family transcription factor 1                               |
| PNPLA3  | 0.671915 | 0.003055 | 0.012999 | 2.962189 | Up | patatin like phospholipase domain containing 3                        |
| ARL5A   | 0.664439 | 2.01E-13 | 7.21E-11 | 7.348126 | Up | ADP ribosylation factor like GTPase 5A                                |
| SRP9    | 0.664421 | 3.48E-13 | 1.17E-10 | 7.27437  | Up | signal recognition particle 9                                         |
| ACOXL   | 0.662442 | 0.00456  | 0.017719 | 2.836576 | Up | acyl-CoA oxidase like                                                 |
| FGF9    | 0.661507 | 1.32E-05 | 0.000173 | 4.357535 | Up | fibroblast growth factor 9                                            |
| HMSD    | 0.661023 | 0.001177 | 0.006083 | 3.244458 | Up | histocompatibility minor serpin domain containing                     |
| SLC7A11 | 0.660826 | 0.004977 | 0.019021 | 2.808517 | Up | solute carrier family 7 member 11                                     |
| EFR3B   | 0.660393 | 1.56E-05 | 0.000198 | 4.3196   | Up | EFR3 homolog B                                                        |
| CLIC5   | 0.659958 | 0.000435 | 0.0028   | 3.517923 | Up | chloride intracellular channel 5                                      |
| SGPP1   | 0.65873  | 5.24E-13 | 1.68E-10 | 7.219008 | Up | sphingosine-1-phosphate phosphatase 1                                 |
| CACNB4  | 0.657264 | 7.08E-09 | 3.55E-07 | 5.788901 | Up | calcium voltage-gated channel auxiliary subunit beta 4                |
| MGAT3   | 0.655583 | 1.09E-05 | 0.000149 | 4.398573 | Up | beta-1,4-mannosyl-glycoprotein 4-beta-N-acetylglucosaminyltransferase |
| CCDC68  | 0.654563 | 3.54E-05 | 0.000384 | 4.135296 | Up | coiled-coil domain containing 68                                      |
| MTARC1  | 0.654334 | 2.76E-06 | 5.05E-05 | 4.68761  | Up | mitochondrial amidoxime reducing component 1                          |
| OLFML2A | 0.653244 | 2.88E-06 | 5.22E-05 | 4.679083 | Up | olfactomedin like 2A                                                  |
| PHGDH   | 0.650395 | 4.83E-05 | 0.000491 | 4.063913 | Up | phosphoglycerate dehydrogenase                                        |
| HSPA6   | 0.648825 | 0.002429 | 0.010867 | 3.031996 | Up | heat shock protein family A (Hsp70) member 6                          |
| TSPAN12 | 0.6488   | 1.40E-05 | 0.000182 | 4.343794 | Up | tetraspanin 12                                                        |
| SCAI    | 0.64777  | 1.34E-12 | 3.55E-10 | 7.089697 | Up | suppressor of cancer cell invasion                                    |
| KCNA4   | 0.647232 | 0.006881 | 0.024538 | 2.702528 | Up | potassium voltage-gated channel subfamily A member 4                  |
| PI4K2B  | 0.646869 | 4.29E-14 | 2.16E-11 | 7.551801 | Up | phosphatidylinositol 4-kinase type 2 beta                             |
| HOXD1   | 0.645662 | 0.001216 | 0.00625  | 3.235109 | Up | homeobox D1                                                           |
| FHDC1   | 0.644069 | 0.000209 | 0.001571 | 3.70805  | Up | FH2 domain containing 1                                               |
| PCDH17  | 0.642583 | 0.000256 | 0.001849 | 3.656389 | Up | protocadherin 17                                                      |
| VIP     | 0.642256 | 0.000144 | 0.001191 | 3.800489 | Up | vasoactive intestinal peptide                                         |
| IGSF6   | 0.641868 | 0.000127 | 0.00108  | 3.832308 | Up | immunoglobulin superfamily member 6                                   |
| GMFB    | 0.641224 | 1.77E-11 | 2.83E-09 | 6.723955 | Up | glia maturation factor beta                                           |
| PLLP    | 0.640686 | 0.00124  | 0.006335 | 3.229481 | Up | plasmolipin                                                           |
| SCOC    | 0.639466 | 6.04E-14 | 2.66E-11 | 7.507132 | Up | short coiled-coil protein                                             |
| SH3GL3  | 0.638209 | 0.006549 | 0.023575 | 2.718952 | Up | SH3 domain containing GRB2 like 3, endophilin A3                      |
| SDR16C5 | 0.636948 | 0.013863 | 0.042871 | 2.4608   | Up | short chain dehydrogenase/reductase family 16C member 5               |
| KLRF1   | 0.636534 | 0.000879 | 0.004837 | 3.326795 | Up | killer cell lectin like receptor F1                                   |

|         |          |          |          |          |    |                                                                           |
|---------|----------|----------|----------|----------|----|---------------------------------------------------------------------------|
| KCNJ2   | 0.636167 | 8.40E-06 | 0.000122 | 4.454662 | Up | potassium inwardly rectifying channel subfamily J member 2                |
| TRHDE   | 0.635749 | 2.98E-05 | 0.000331 | 4.175363 | Up | thyrotropin releasing hormone degrading enzyme                            |
| LRRC25  | 0.635206 | 1.85E-05 | 0.000226 | 4.281738 | Up | leucine rich repeat containing 25                                         |
| ADGRE3  | 0.631847 | 0.001262 | 0.006434 | 3.224479 | Up | adhesion G protein-coupled receptor E3                                    |
| KL      | 0.630848 | 0.000407 | 0.002665 | 3.535256 | Up | klotho                                                                    |
| UBE2D1  | 0.630474 | 3.51E-10 | 3.04E-08 | 6.27431  | Up | ubiquitin conjugating enzyme E2 D1                                        |
| ADH1A   | 0.629388 | 0.000114 | 0.000992 | 3.858538 | Up | alcohol dehydrogenase 1A (class I), alpha polypeptide                     |
| SMAD6   | 0.629134 | 0.005888 | 0.021718 | 2.753979 | Up | SMAD family member 6                                                      |
| ANKRD29 | 0.626968 | 4.86E-05 | 0.000493 | 4.062302 | Up | ankyrin repeat domain 29                                                  |
| ELF5    | 0.626428 | 0.008205 | 0.028168 | 2.643534 | Up | E74 like ETS transcription factor 5                                       |
| KHDRBS2 | 0.626063 | 0.001111 | 0.005819 | 3.260824 | Up | KH RNA binding domain containing, signal transduction associated 2        |
| BMPR2   | 0.626031 | 1.11E-07 | 3.52E-06 | 5.307754 | Up | bone morphogenetic protein receptor type 2                                |
| GCA     | 0.624975 | 9.23E-07 | 2.03E-05 | 4.907454 | Up | grancalcin                                                                |
| AARD    | 0.624493 | 0.009499 | 0.031527 | 2.593551 | Up | alanine and arginine rich domain containing protein                       |
| APOA1   | 0.62282  | 0.002119 | 0.009809 | 3.073079 | Up | apolipoprotein A1                                                         |
| CCDC85A | 0.620791 | 0.000687 | 0.003993 | 3.394686 | Up | coiled-coil domain containing 85A                                         |
| QKI     | 0.620615 | 9.91E-13 | 2.82E-10 | 7.131688 | Up | QKI, KH domain containing RNA binding                                     |
| NEGR1   | 0.619599 | 9.24E-05 | 0.000838 | 3.909811 | Up | neuronal growth regulator 1                                               |
| CALCRL  | 0.618234 | 2.85E-05 | 0.00032  | 4.184983 | Up | calcitonin receptor like receptor                                         |
| TGFBR3  | 0.617324 | 1.66E-06 | 3.34E-05 | 4.790577 | Up | transforming growth factor beta receptor 3                                |
| SPRYD7  | 0.616844 | 1.80E-10 | 1.75E-08 | 6.377367 | Up | SPRY domain containing 7                                                  |
| INSIG1  | 0.615911 | 8.48E-06 | 0.000123 | 4.452736 | Up | insulin induced gene 1                                                    |
| RASGRF1 | 0.615844 | 0.003343 | 0.013942 | 2.934259 | Up | Ras protein specific guanine nucleotide releasing factor 1                |
| LRRK2   | 0.615661 | 0.001849 | 0.008785 | 3.113535 | Up | leucine rich repeat kinase 2                                              |
| NEBL    | 0.613599 | 5.20E-07 | 1.26E-05 | 5.018905 | Up | nebulette                                                                 |
| FAM241A | 0.613362 | 4.39E-08 | 1.60E-06 | 5.474461 | Up | family with sequence similarity 241 member A                              |
| HDHD2   | 0.613187 | 3.63E-10 | 3.12E-08 | 6.269246 | Up | haloacid dehalogenase like hydrolase domain containing 2                  |
| ATP8A2  | 0.613091 | 0.000466 | 0.002954 | 3.499556 | Up | ATPase phospholipid transporting 8A2                                      |
| CD244   | 0.612948 | 0.000252 | 0.001829 | 3.659732 | Up | CD244 molecule                                                            |
| TLR3    | 0.612335 | 1.62E-12 | 4.06E-10 | 7.064096 | Up | toll like receptor 3                                                      |
| CAV2    | 0.607636 | 2.21E-07 | 6.04E-06 | 5.18093  | Up | caveolin 2                                                                |
| HLX     | 0.607112 | 2.03E-06 | 3.92E-05 | 4.750713 | Up | H2.0 like homeobox                                                        |
| DLEU7   | 0.606691 | 0.000446 | 0.002861 | 3.511159 | Up | deleted in lymphocytic leukemia 7                                         |
| CLEC4D  | 0.60665  | 0.016819 | 0.049809 | 2.390646 | Up | C-type lectin domain family 4 member D                                    |
| KCNMB4  | 0.60614  | 0.000532 | 0.003268 | 3.463952 | Up | potassium calcium-activated channel subfamily M regulatory beta subunit 4 |
| NLRP12  | 0.605152 | 0.002123 | 0.009821 | 3.072504 | Up | NLR family pyrin domain containing 12                                     |
| ADRB1   | 0.60511  | 0.009167 | 0.030705 | 2.605774 | Up | adrenoceptor beta 1                                                       |
| OCLN    | 0.604663 | 0.000883 | 0.004857 | 3.32527  | Up | occludin                                                                  |
| VNN2    | 0.604537 | 0.004963 | 0.018991 | 2.809422 | Up | vanin 2                                                                   |
| TNFSF10 | 0.604197 | 0.000206 | 0.001551 | 3.711848 | Up | TNF superfamily member 10                                                 |
| SPOCK2  | 0.603771 | 0.002486 | 0.01107  | 3.025061 | Up | SPARC (osteonectin), cwcv and kazal like domains proteoglycan 2           |
| SUSD2   | 0.602142 | 0.002493 | 0.011091 | 3.02423  | Up | sushi domain containing 2                                                 |



|            |          |          |          |          |    |                                                             |
|------------|----------|----------|----------|----------|----|-------------------------------------------------------------|
| SLC22A3    | 0.601034 | 0.000226 | 0.001682 | 3.687598 | Up | solute carrier family 22 member 3                           |
| SPIN4      | 0.600324 | 9.51E-10 | 6.66E-08 | 6.117428 | Up | spindlin family member 4                                    |
| CA2        | 0.600226 | 0.001853 | 0.0088   | 3.112755 | Up | carbonic anhydrase 2                                        |
| GCSAML     | 0.599908 | 0.000171 | 0.001349 | 3.75825  | Up | germinal center associated signaling and motility like      |
| TMEM170B   | 0.598208 | 2.27E-10 | 2.15E-08 | 6.341856 | Up | transmembrane protein 170B                                  |
| PAPSS2     | 0.597686 | 1.53E-05 | 0.000195 | 4.324223 | Up | 3'-phosphoadenosine 5'-phosphosulfate synthase 2            |
| ST6GALNAC5 | 0.596594 | 4.33E-05 | 0.000448 | 4.088898 | Up | ST6 N-acetylgalactosaminide alpha-2,6-sialyltransferase 5   |
| EMP2       | 0.596575 | 0.000932 | 0.005066 | 3.310423 | Up | epithelial membrane protein 2                               |
| GPM6B      | 0.596078 | 8.34E-05 | 0.000772 | 3.934332 | Up | glycoprotein M6B                                            |
| C10orf105  | 0.595753 | 0.001694 | 0.00818  | 3.139286 | Up | chromosome 10 open reading frame 105                        |
| SNX10      | 0.594894 | 1.03E-05 | 0.000142 | 4.41179  | Up | sorting nexin 10                                            |
| LIFR       | 0.593395 | 0.000161 | 0.001287 | 3.774152 | Up | LIF receptor subunit alpha                                  |
| MZT1       | 0.593244 | 1.43E-18 | 1.44E-14 | 8.795224 | Up | mitotic spindle organizing protein 1                        |
| PHACTR1    | 0.593018 | 8.94E-05 | 0.000818 | 3.917611 | Up | phosphatase and actin regulator 1                           |
| HPN        | 0.59227  | 0.011953 | 0.038127 | 2.513526 | Up | hepsin                                                      |
| RIMS4      | 0.590851 | 0.012128 | 0.038554 | 2.508402 | Up | regulating synaptic membrane exocytosis 4                   |
| MNDA       | 0.589645 | 0.000304 | 0.002124 | 3.61208  | Up | myeloid cell nuclear differentiation antigen                |
| SLFN1      | 0.587914 | 0.002757 | 0.012043 | 2.993569 | Up | schlafen like 1                                             |
| LILRB1     | 0.586426 | 0.000582 | 0.003516 | 3.440078 | Up | leukocyte immunoglobulin like receptor B1                   |
| TLR8       | 0.585815 | 0.001524 | 0.007534 | 3.17001  | Up | toll like receptor 8                                        |
| CMPK2      | 0.585172 | 3.86E-05 | 0.000409 | 4.115815 | Up | cytidine/uridine monophosphate kinase 2                     |
| GTF2A1     | 0.585001 | 4.50E-17 | 2.10E-13 | 8.399151 | Up | general transcription factor IIA subunit 1                  |
| GATA3      | 0.584657 | 1.40E-05 | 0.000182 | 4.343827 | Up | GATA binding protein 3                                      |
| RNASE4     | 0.583629 | 0.000611 | 0.003646 | 3.426732 | Up | ribonuclease A family member 4                              |
| DCXR       | 0.581767 | 0.000136 | 0.001136 | 3.815885 | Up | dicarbonyl and L-xylulose reductase                         |
| RSPO2      | 0.581175 | 0.003664 | 0.014946 | 2.905734 | Up | R-spondin 2                                                 |
| CCR2       | 0.579284 | 0.005379 | 0.020184 | 2.7834   | Up | C-C motif chemokine receptor 2                              |
| IFIT3      | 0.579066 | 0.000243 | 0.001775 | 3.669268 | Up | interferon induced protein with tetratricopeptide repeats 3 |
| SFTA2      | 0.578857 | 0.016817 | 0.049809 | 2.390687 | Up | surfactant associated 2                                     |
| SEC14L6    | 0.578757 | 0.002014 | 0.009407 | 3.088189 | Up | SEC14 like lipid binding 6                                  |
| NEK7       | 0.578617 | 1.49E-11 | 2.55E-09 | 6.74864  | Up | NIMA related kinase 7                                       |
| TMEM41B    | 0.577043 | 1.34E-07 | 4.07E-06 | 5.272886 | Up | transmembrane protein 41B                                   |
| BEND4      | 0.57309  | 0.004364 | 0.017055 | 2.850564 | Up | BEN domain containing 4                                     |
| NKAPL      | 0.572662 | 3.23E-06 | 5.71E-05 | 4.655432 | Up | NFkB activating protein like                                |
| EPB41L5    | 0.572631 | 4.51E-06 | 7.41E-05 | 4.586592 | Up | erythrocyte membrane protein band 4.1 like 5                |
| AP1S2      | 0.572308 | 1.68E-10 | 1.71E-08 | 6.388058 | Up | adaptor related protein complex 1 subunit sigma 2           |
| DIPK2A     | 0.572184 | 3.76E-09 | 2.12E-07 | 5.894403 | Up | divergent protein kinase domain 2A                          |
| MARCHF1    | 0.571421 | 4.18E-06 | 6.98E-05 | 4.602393 | Up | membrane associated ring-CH-type finger 1                   |
| KCTD14     | 0.571341 | 0.001482 | 0.007365 | 3.178195 | Up | potassium channel tetramerization domain containing 14      |
| VGLL3      | 0.571145 | 0.000174 | 0.001367 | 3.753726 | Up | vestigial like family member 3                              |
| CD274      | 0.570647 | 0.000935 | 0.005083 | 3.309381 | Up | CD274 molecule                                              |
| SPRING1    | 0.570626 | 9.22E-06 | 0.000131 | 4.43474  | Up | SREBF pathway regulator in golgi 1                          |
| ALDH6A1    | 0.568506 | 1.54E-09 | 1.00E-07 | 6.03992  | Up | aldehyde dehydrogenase 6 family member A1                   |

|          |          |          |          |          |    |                                                         |
|----------|----------|----------|----------|----------|----|---------------------------------------------------------|
| B3GALT2  | 0.567137 | 0.0036   | 0.014744 | 2.911272 | Up | beta-1,3-galactosyltransferase 2                        |
| DDIAS    | 0.566491 | 5.06E-05 | 0.000508 | 4.053038 | Up | DNA damage induced apoptosis suppressor                 |
| STARD4   | 0.565099 | 1.06E-06 | 2.27E-05 | 4.880904 | Up | StAR related lipid transfer domain containing 4         |
| GUCY1A2  | 0.563988 | 0.000793 | 0.004475 | 3.355179 | Up | guanylate cyclase 1 soluble subunit alpha 2             |
| CHPT1    | 0.563345 | 1.45E-11 | 2.51E-09 | 6.752944 | Up | choline phosphotransferase 1                            |
| TLR7     | 0.562992 | 0.001032 | 0.005492 | 3.281558 | Up | toll like receptor 7                                    |
| MFSD2A   | 0.562216 | 0.015201 | 0.046189 | 2.42755  | Up | major facilitator superfamily domain containing 2A      |
| RALA     | 0.562144 | 4.12E-06 | 6.91E-05 | 4.605427 | Up | RAS like proto-oncogene A                               |
| DCC      | 0.559864 | 0.009224 | 0.030846 | 2.60364  | Up | DCC netrin 1 receptor                                   |
| CCRL2    | 0.559776 | 0.000221 | 0.001645 | 3.694255 | Up | C-C motif chemokine receptor like 2                     |
| PRAM1    | 0.559391 | 0.000509 | 0.00315  | 3.475976 | Up | PML-RARA regulated adaptor molecule 1                   |
| TMEM47   | 0.559081 | 1.57E-05 | 0.000199 | 4.318306 | Up | transmembrane protein 47                                |
| SIGLEC14 | 0.558047 | 0.002271 | 0.010365 | 3.052288 | Up | sialic acid binding Ig like lectin 14                   |
| BEX1     | 0.557362 | 0.00419  | 0.016571 | 2.863505 | Up | brain expressed X-linked 1                              |
| MAL2     | 0.556666 | 0.000456 | 0.002911 | 3.505149 | Up | mal, T cell differentiation protein 2                   |
| BMPER    | 0.556641 | 3.31E-05 | 0.000361 | 4.150888 | Up | BMP binding endothelial regulator                       |
| ARHGAP29 | 0.555352 | 5.44E-07 | 1.29E-05 | 5.010112 | Up | Rho GTPase activating protein 29                        |
| SCAMP1   | 0.554475 | 5.70E-10 | 4.36E-08 | 6.198384 | Up | secretory carrier membrane protein 1                    |
| TMEM139  | 0.553966 | 0.011346 | 0.036506 | 2.531867 | Up | transmembrane protein 139                               |
| PDP2     | 0.552511 | 4.71E-07 | 1.16E-05 | 5.037684 | Up | pyruvate dehydrogenase phosphatase catalytic subunit 2  |
| DUSP26   | 0.55159  | 0.001678 | 0.008127 | 3.141919 | Up | dual specificity phosphatase 26                         |
| ZMYM1    | 0.550816 | 5.89E-11 | 7.16E-09 | 6.54647  | Up | zinc finger MYM-type containing 1                       |
| UPB1     | 0.550478 | 0.013577 | 0.042165 | 2.468259 | Up | beta-ureidopropionase 1                                 |
| KANK4    | 0.550172 | 0.007273 | 0.025625 | 2.684059 | Up | KN motif and ankyrin repeat domains 4                   |
| SMCO3    | 0.549942 | 0.00845  | 0.02886  | 2.633539 | Up | single-pass membrane protein with coiled-coil domains 3 |
| ACP3     | 0.549624 | 0.001393 | 0.007011 | 3.19603  | Up | acid phosphatase 3                                      |
| EFNB2    | 0.54929  | 2.77E-05 | 0.000312 | 4.191807 | Up | ephrin B2                                               |
| CCBE1    | 0.548101 | 0.00059  | 0.003551 | 3.436371 | Up | collagen and calcium binding EGF domains 1              |
| PDE8B    | 0.547797 | 0.000263 | 0.001892 | 3.649284 | Up | phosphodiesterase 8B                                    |
| ZBTB41   | 0.547533 | 5.54E-09 | 2.87E-07 | 5.830228 | Up | zinc finger and BTB domain containing 41                |
| HPCAL1   | 0.547012 | 4.84E-05 | 0.000492 | 4.063307 | Up | hippocalcin like 1                                      |
| PKIA     | 0.546874 | 2.98E-08 | 1.16E-06 | 5.542764 | Up | cAMP-dependent protein kinase inhibitor alpha           |
| HSD17B12 | 0.545849 | 1.63E-15 | 2.23E-12 | 7.966727 | Up | hydroxysteroid 17-beta dehydrogenase 12                 |
| ANKRD22  | 0.545776 | 0.005242 | 0.019788 | 2.791769 | Up | ankyrin repeat domain 22                                |
| FZD8     | 0.545717 | 1.33E-05 | 0.000175 | 4.354308 | Up | frizzled class receptor 8                               |
| CAV1     | 0.545385 | 1.30E-05 | 0.000172 | 4.359406 | Up | caveolin 1                                              |
| C1orf167 | 0.544974 | 0.003796 | 0.015339 | 2.894656 | Up | chromosome 1 open reading frame 167                     |
| ACSS2    | 0.543889 | 2.86E-05 | 0.00032  | 4.184137 | Up | acyl-CoA synthetase short chain family member 2         |
| DHCR7    | 0.543582 | 0.001483 | 0.007368 | 3.177912 | Up | 7-dehydrocholesterol reductase                          |
| SP6      | 0.543313 | 0.010387 | 0.033899 | 2.562678 | Up | Sp6 transcription factor                                |
| ANP32E   | 0.542858 | 3.64E-16 | 7.83E-13 | 8.150004 | Up | acidic nuclear phosphoprotein 32 family member E        |
| CASD1    | 0.542753 | 9.59E-11 | 1.10E-08 | 6.473351 | Up | CAS1 domain containing 1                                |
| ST20     | 0.541365 | 0.00043  | 0.002783 | 3.520756 | Up | suppressor of tumorigenicity 20                         |

|            |          |          |          |          |    |                                                                                    |
|------------|----------|----------|----------|----------|----|------------------------------------------------------------------------------------|
| UBE2W      | 0.540435 | 1.97E-12 | 4.63E-10 | 7.036862 | Up | ubiquitin conjugating enzyme E2 W                                                  |
| FREM2      | 0.540052 | 0.010923 | 0.035359 | 2.54514  | Up | FRAS1 related extracellular matrix 2                                               |
| SLC25A46   | 0.539395 | 1.70E-16 | 5.11E-13 | 8.241772 | Up | solute carrier family 25 member 46                                                 |
| SC5D       | 0.539203 | 1.77E-11 | 2.83E-09 | 6.723974 | Up | sterol-C5-desaturase                                                               |
| ID4        | 0.538984 | 0.000302 | 0.002117 | 3.613301 | Up | inhibitor of DNA binding 4                                                         |
| ARRB1      | 0.537974 | 8.85E-06 | 0.000127 | 4.443454 | Up | arrestin beta 1                                                                    |
| CLCN4      | 0.537838 | 2.41E-06 | 4.49E-05 | 4.715224 | Up | chloride voltage-gated channel 4                                                   |
| TRPC3      | 0.53746  | 0.002454 | 0.01095  | 3.028973 | Up | transient receptor potential cation channel subfamily C member 3                   |
| CR1        | 0.537417 | 0.008051 | 0.027755 | 2.649923 | Up | complement C3b/C4b receptor 1 (Knops blood group)                                  |
| GLT1D1     | 0.537203 | 0.013284 | 0.041423 | 2.476075 | Up | glycosyltransferase 1 domain containing 1                                          |
| WWC2       | 0.536541 | 4.47E-05 | 0.000461 | 4.081995 | Up | WW and C2 domain containing 2                                                      |
| B3GALNT1   | 0.536032 | 0.0001   | 0.000891 | 3.88977  | Up | beta-1,3-N-acetylgalactosaminyltransferase 1 (globoside blood group)               |
| GPR82      | 0.53494  | 0.008485 | 0.028952 | 2.632148 | Up | G protein-coupled receptor 82                                                      |
| ZBTB6      | 0.533771 | 1.14E-09 | 7.77E-08 | 6.088452 | Up | zinc finger and BTB domain containing 6                                            |
| ERVMER34-1 | 0.532895 | 0.000462 | 0.002935 | 3.501656 | Up | endogenous retrovirus group MER34 member 1, envelope                               |
| HECW2      | 0.532689 | 0.014359 | 0.044119 | 2.448161 | Up | HECT, C2 and WW domain containing E3 ubiquitin protein ligase 2                    |
| PEG10      | 0.531923 | 0.006459 | 0.023346 | 2.723532 | Up | paternally expressed 10                                                            |
| ANOS1      | 0.53174  | 0.000843 | 0.004699 | 3.338126 | Up | anosmin 1                                                                          |
| PPP3R1     | 0.530836 | 2.47E-15 | 2.80E-12 | 7.914945 | Up | protein phosphatase 3 regulatory subunit B, alpha                                  |
| DLL4       | 0.529304 | 0.00067  | 0.003915 | 3.401581 | Up | delta like canonical Notch ligand 4                                                |
| CFL2       | 0.529034 | 3.05E-09 | 1.79E-07 | 5.928999 | Up | cofilin 2                                                                          |
| MEFV       | 0.528895 | 0.010878 | 0.035226 | 2.546605 | Up | MEFV innate immunity regulator, pyrin                                              |
| TMC2       | 0.527636 | 0.009997 | 0.032918 | 2.575942 | Up | transmembrane channel like 2                                                       |
| ANXA3      | 0.527469 | 0.005872 | 0.021672 | 2.754838 | Up | annexin A3                                                                         |
| TFPI       | 0.527239 | 1.69E-07 | 4.90E-06 | 5.230895 | Up | tissue factor pathway inhibitor                                                    |
| MYLK4      | 0.527064 | 0.000588 | 0.003547 | 3.437147 | Up | myosin light chain kinase family member 4                                          |
| MAPT       | 0.527029 | 0.002179 | 0.010021 | 3.064653 | Up | microtubule associated protein tau                                                 |
| ACAT2      | 0.52679  | 5.87E-05 | 0.000574 | 4.017866 | Up | acetyl-CoA acetyltransferase 2                                                     |
| C1GALT1    | 0.526288 | 3.28E-11 | 4.62E-09 | 6.633558 | Up | core 1 synthase, glycoprotein-N-acetylgalactosamine 3-beta-galactosyltransferase 1 |
| ASGR2      | 0.525767 | 0.009556 | 0.031683 | 2.591481 | Up | asialoglycoprotein receptor 2                                                      |
| C19orf38   | 0.525456 | 0.001171 | 0.006059 | 3.245911 | Up | chromosome 19 open reading frame 38                                                |
| SLC33A1    | 0.524917 | 5.87E-10 | 4.44E-08 | 6.193931 | Up | solute carrier family 33 member 1                                                  |
| EDIL3      | 0.524859 | 5.00E-05 | 0.000505 | 4.055521 | Up | EGF like repeats and discoidin domains 3                                           |
| MATN3      | 0.524406 | 0.006459 | 0.023346 | 2.723514 | Up | matrilin 3                                                                         |
| EBP        | 0.524406 | 0.002161 | 0.009953 | 3.067148 | Up | EBP cholesterol delta-isomerase                                                    |
| C21orf91   | 0.524032 | 3.64E-09 | 2.08E-07 | 5.899624 | Up | chromosome 21 open reading frame 91                                                |
| SLITRK2    | 0.523462 | 0.014717 | 0.045018 | 2.439267 | Up | SLIT and NTRK like family member 2                                                 |
| CXADR      | 0.523136 | 0.000903 | 0.004937 | 3.319175 | Up | CXADR Ig-like cell adhesion molecule                                               |
| IRX1       | 0.522985 | 0.008309 | 0.028482 | 2.639239 | Up | iroquois homeobox 1                                                                |
| EPAS1      | 0.522235 | 0.000563 | 0.003424 | 3.448637 | Up | endothelial PAS domain protein 1                                                   |
| ADGRG2     | 0.522134 | 0.001746 | 0.008397 | 3.130394 | Up | adhesion G protein-coupled receptor G2                                             |
| RBM27      | 0.52167  | 3.55E-09 | 2.05E-07 | 5.903944 | Up | RNA binding motif protein 27                                                       |

|          |          |          |          |          |      |                                                                                                                    |
|----------|----------|----------|----------|----------|------|--------------------------------------------------------------------------------------------------------------------|
| IDI1     | 0.521166 | 3.05E-07 | 7.98E-06 | 5.120342 | Up   | isopentenyl-diphosphate delta isomerase 1                                                                          |
| RNF144B  | 0.5209   | 9.46E-08 | 3.09E-06 | 5.336847 | Up   | ring finger protein 144B                                                                                           |
| TBX3     | 0.520278 | 7.70E-05 | 0.000723 | 3.953524 | Up   | T-box transcription factor 3                                                                                       |
| IRX2     | 0.519862 | 0.003849 | 0.015513 | 2.890261 | Up   | iroquois homeobox 2                                                                                                |
| FADS1    | 0.519046 | 2.67E-05 | 0.000303 | 4.199613 | Up   | fatty acid desaturase 1                                                                                            |
| GIMAP4   | 0.517909 | 1.94E-07 | 5.43E-06 | 5.205286 | Up   | GTPase, IMAP family member 4                                                                                       |
| DKK2     | 0.516481 | 0.006694 | 0.024018 | 2.711671 | Up   | dickkopf WNT signaling pathway inhibitor 2                                                                         |
| DNAJB14  | 0.51623  | 4.92E-12 | 9.75E-10 | 6.907878 | Up   | DnaJ heat shock protein family (Hsp40) member B14                                                                  |
| PHACTR2  | 0.516147 | 1.67E-11 | 2.74E-09 | 6.732116 | Up   | phosphatase and actin regulator 2                                                                                  |
| PXMP4    | 0.515393 | 0.00028  | 0.001987 | 3.633488 | Up   | peroxisomal membrane protein 4                                                                                     |
| GP1R     | 0.515095 | 0.006923 | 0.024657 | 2.700507 | Up   | G protein-coupled estrogen receptor 1                                                                              |
| SUCNR1   | 0.514658 | 0.001614 | 0.007884 | 3.153283 | Up   | succinate receptor 1                                                                                               |
| PCLAF    | 0.51345  | 0.005203 | 0.019684 | 2.794197 | Up   | PCNA clamp associated factor                                                                                       |
| CDC20B   | -2.45054 | 7.11E-06 | 0.000108 | -4.49029 | Down | cell division cycle 20B                                                                                            |
| MUC5AC   | -2.19179 | 0.000911 | 0.004971 | -3.31675 | Down | mucin 5AC, oligomeric mucus/gel-forming                                                                            |
| CYP2A6   | -1.92571 | 8.42E-06 | 0.000122 | -4.45413 | Down | cytochrome P450 family 2 subfamily A member 6                                                                      |
| SERP1B1  | -1.86724 | 0.004146 | 0.016433 | -2.86683 | Down | serpin family B member 11                                                                                          |
| PCK1     | -1.82117 | 0.000302 | 0.002114 | -3.61393 | Down | phosphoenolpyruvate carboxykinase 1                                                                                |
| BTG4     | -1.80784 | 0.000269 | 0.001923 | -3.64357 | Down | BTG anti-proliferation factor 4                                                                                    |
| MSMB     | -1.78547 | 0.005298 | 0.019954 | -2.78833 | Down | microseminoprotein beta                                                                                            |
| LYPD2    | -1.74807 | 5.39E-07 | 1.28E-05 | -5.01174 | Down | LY6/PLAUR domain containing 2                                                                                      |
| PITX1    | -1.73123 | 0.000148 | 0.001213 | -3.79403 | Down | paired like homeodomain 1                                                                                          |
| ATP12A   | -1.7033  | 0.000434 | 0.0028   | -3.51833 | Down | ATPase H+/K+ transporting non-gastric alpha2 subunit                                                               |
| SERP1B3  | -1.66423 | 0.007278 | 0.02563  | -2.68384 | Down | serpin family B member 3                                                                                           |
| FRMPD2   | -1.66279 | 0.00032  | 0.002212 | -3.59869 | Down | FERM and PDZ domain containing 2                                                                                   |
| FER1L6   | -1.62163 | 0.000198 | 0.001507 | -3.72107 | Down | fer-1 like family member 6                                                                                         |
| RSPH10B2 | -1.6209  | 0.000122 | 0.001051 | -3.84112 | Down | radial spoke head 10 homolog B2<br>multiciliate differentiation and DNA synthesis associated cell cycle<br>protein |
| MCIDAS   | -1.59413 | 0.001536 | 0.007584 | -3.16773 | Down | leucine rich repeat containing 74B                                                                                 |
| LRRC74B  | -1.58345 | 0.000224 | 0.001666 | -3.69019 | Down | cyclin O                                                                                                           |
| CCNO     | -1.57511 | 7.78E-05 | 0.000729 | -3.95109 | Down | cytochrome P450 family 2 subfamily F member 1                                                                      |
| CYP2F1   | -1.56943 | 0.002997 | 0.012805 | -2.96804 | Down | keratin 14                                                                                                         |
| KRT14    | -1.56546 | 0.008895 | 0.029992 | -2.61607 | Down | glutathione S-transferase alpha 2                                                                                  |
| GSTA2    | -1.56532 | 0.00216  | 0.009953 | -3.06725 | Down | matrix metalloproteinase 10                                                                                        |
| MMP10    | -1.56288 | 0.000348 | 0.002366 | -3.57649 | Down | deuterosome assembly protein 1                                                                                     |
| DEUP1    | -1.56273 | 0.000147 | 0.001207 | -3.79615 | Down | dynein regulatory complex subunit 1                                                                                |
| DRC1     | -1.54327 | 0.000186 | 0.001436 | -3.73667 | Down | F-box and WD repeat domain containing 10                                                                           |
| FBXW10   | -1.53831 | 0.000179 | 0.001397 | -3.74627 | Down | dynein axonemal assembly factor 1                                                                                  |
| DNAAF1   | -1.538   | 1.91E-05 | 0.000231 | -4.27558 | Down | dynein axonemal intermediate chain 1                                                                               |
| DNAI1    | -1.53788 | 0.000288 | 0.002037 | -3.62592 | Down | coiled-coil domain containing 190                                                                                  |
| CCDC190  | -1.52967 | 0.000629 | 0.003727 | -3.41874 | Down | cilia and flagella associated protein 299                                                                          |
| CFAP299  | -1.51757 | 0.000871 | 0.004807 | -3.32913 | Down | dynein axonemal heavy chain 3                                                                                      |
| DNAH3    | -1.51576 | 0.000476 | 0.003004 | -3.49366 | Down |                                                                                                                    |

|          |          |          |          |          |      |                                                        |
|----------|----------|----------|----------|----------|------|--------------------------------------------------------|
| EPPIN    | -1.51207 | 0.001943 | 0.009141 | -3.09884 | Down | epididymal peptidase inhibitor                         |
| DNAH10   | -1.49046 | 7.18E-05 | 0.000681 | -3.97035 | Down | dynein axonemal heavy chain 10                         |
| CFAP100  | -1.48643 | 0.000481 | 0.003027 | -3.491   | Down | cilia and flagella associated protein 100              |
| CFAP157  | -1.48478 | 0.000181 | 0.001405 | -3.74453 | Down | cilia and flagella associated protein 157              |
| CRABP1   | -1.48438 | 0.000295 | 0.002076 | -3.62005 | Down | cellular retinoic acid binding protein 1               |
| SEC14L3  | -1.48299 | 0.000159 | 0.001281 | -3.77619 | Down | SEC14 like lipid binding 3                             |
| KIAA2012 | -1.482   | 0.000814 | 0.004573 | -3.34805 | Down | KIAA2012                                               |
| MUC13    | -1.47501 | 0.000448 | 0.002869 | -3.5101  | Down | mucin 13, cell surface associated                      |
| CFAP52   | -1.47438 | 0.000374 | 0.002486 | -3.55781 | Down | cilia and flagella associated protein 52               |
| DCDC2B   | -1.47015 | 0.00077  | 0.00437  | -3.36344 | Down | doublecortin domain containing 2B                      |
| CYP2A13  | -1.46618 | 0.013335 | 0.041539 | -2.47471 | Down | cytochrome P450 family 2 subfamily A member 13         |
| HOATZ    | -1.45943 | 0.001111 | 0.005819 | -3.26081 | Down | HOATZ cilia and flagella associated protein            |
| MS4A8    | -1.45835 | 0.001088 | 0.005739 | -3.26664 | Down | membrane spanning 4-domains A8                         |
| CDHR4    | -1.45622 | 0.000217 | 0.001624 | -3.69827 | Down | cadherin related family member 4                       |
| NME9     | -1.4507  | 0.000138 | 0.001148 | -3.81261 | Down | NME/NM23 family member 9                               |
| BEST4    | -1.44768 | 1.63E-06 | 3.29E-05 | -4.79482 | Down | bestrophin 4                                           |
| CROCC2   | -1.44683 | 2.06E-05 | 0.000246 | -4.25839 | Down | ciliary rootlet coiled-coil, rootletin family member 2 |
| C11orf16 | -1.44035 | 0.001031 | 0.005487 | -3.28191 | Down | chromosome 11 open reading frame 16                    |
| ALOX15   | -1.43719 | 0.000256 | 0.001851 | -3.65579 | Down | arachidonate 15-lipoxygenase                           |
| LMNTD1   | -1.43668 | 0.001573 | 0.007718 | -3.16092 | Down | lamin tail domain containing 1                         |
| DRD5     | -1.43419 | 0.000173 | 0.001363 | -3.75484 | Down | dopamine receptor D5                                   |
| DNAH9    | -1.4312  | 0.000456 | 0.002911 | -3.50508 | Down | dynein axonemal heavy chain 9                          |
| HYDIN    | -1.42919 | 0.000326 | 0.002243 | -3.59387 | Down | HYDIN axonemal central pair apparatus protein          |
| DRC3     | -1.42869 | 1.72E-06 | 3.43E-05 | -4.78429 | Down | dynein regulatory complex subunit 3                    |
| CFAP57   | -1.42646 | 6.87E-05 | 0.000657 | -3.98087 | Down | cilia and flagella associated protein 57               |
| CFAP74   | -1.42588 | 0.00016  | 0.001283 | -3.77507 | Down | cilia and flagella associated protein 74               |
| AKAP14   | -1.4216  | 0.001315 | 0.006677 | -3.21268 | Down | A-kinase anchoring protein 14                          |
| TEKT2    | -1.41712 | 0.000197 | 0.001502 | -3.72225 | Down | tektin 2                                               |
| MUC16    | -1.41705 | 0.002105 | 0.009755 | -3.07498 | Down | mucin 16, cell surface associated                      |
| TEKT1    | -1.41461 | 0.001166 | 0.006046 | -3.24713 | Down | tektin 1                                               |
| CFAP46   | -1.41418 | 9.25E-05 | 0.000838 | -3.90959 | Down | cilia and flagella associated protein 46               |
| CFAP65   | -1.41029 | 0.000568 | 0.003447 | -3.44657 | Down | cilia and flagella associated protein 65               |
| SPAG17   | -1.40988 | 0.000242 | 0.001768 | -3.67064 | Down | sperm associated antigen 17                            |
| C7orf57  | -1.4069  | 0.000251 | 0.001818 | -3.66158 | Down | chromosome 7 open reading frame 57                     |
| DNAJB13  | -1.40688 | 3.71E-05 | 0.000398 | -4.12498 | Down | DnaJ heat shock protein family (Hsp40) member B13      |
| CCNA1    | -1.40251 | 2.12E-05 | 0.000251 | -4.25187 | Down | cyclin A1                                              |
| SLC23A1  | -1.39999 | 0.000596 | 0.00358  | -3.43333 | Down | solute carrier family 23 member 1                      |
| VWA3B    | -1.39961 | 0.000985 | 0.005296 | -3.29466 | Down | von Willebrand factor A domain containing 3B           |
| C1orf87  | -1.39865 | 0.000364 | 0.002445 | -3.56502 | Down | chromosome 1 open reading frame 87                     |
| CAPSL    | -1.39804 | 0.001974 | 0.00925  | -3.09411 | Down | calcyphosine like                                      |
| CCDC33   | -1.39757 | 0.002031 | 0.009463 | -3.08566 | Down | coiled-coil domain containing 33                       |
| STOML3   | -1.39531 | 0.001925 | 0.009086 | -3.10164 | Down | stomatol like 3                                        |
| CFAP53   | -1.39272 | 5.10E-05 | 0.000511 | -4.051   | Down | cilia and flagella associated protein 53               |

|          |          |          |          |          |      |                                                              |
|----------|----------|----------|----------|----------|------|--------------------------------------------------------------|
| ARMC3    | -1.39223 | 0.000975 | 0.005262 | -3.29751 | Down | armadillo repeat containing 3                                |
| LDLRAD1  | -1.39168 | 0.001236 | 0.00632  | -3.23055 | Down | low density lipoprotein receptor class A domain containing 1 |
| SIAH3    | -1.3916  | 0.000331 | 0.002275 | -3.58974 | Down | siah E3 ubiquitin protein ligase family member 3             |
| DNAH12   | -1.3911  | 0.000455 | 0.002906 | -3.50599 | Down | dynein axonemal heavy chain 12                               |
| CCDC65   | -1.39073 | 4.40E-05 | 0.000455 | -4.08516 | Down | coiled-coil domain containing 65                             |
| ODAD1    | -1.39061 | 0.000116 | 0.001004 | -3.85487 | Down | outer dynein arm docking complex subunit 1                   |
| MAP3K19  | -1.39039 | 0.002261 | 0.010329 | -3.05363 | Down | mitogen-activated protein kinase kinase kinase 19            |
| ABHD12B  | -1.38167 | 0.000919 | 0.005009 | -3.31429 | Down | abhydrolase domain containing 12B                            |
| PRR29    | -1.37458 | 0.00013  | 0.001101 | -3.82653 | Down | proline rich 29                                              |
| TTLL9    | -1.3741  | 1.77E-05 | 0.000218 | -4.29175 | Down | tubulin tyrosine ligase like 9                               |
| MARCHF10 | -1.37183 | 0.000111 | 0.000972 | -3.86458 | Down | membrane associated ring-CH-type finger 10                   |
| RSPH14   | -1.37091 | 0.000386 | 0.002554 | -3.54952 | Down | radial spoke head 14 homolog                                 |
| CFAP107  | -1.36945 | 0.002814 | 0.012205 | -2.98736 | Down | cilia and flagella associated protein 107                    |
| DNAH11   | -1.36912 | 1.20E-06 | 2.56E-05 | -4.85515 | Down | dynein axonemal heavy chain 11                               |
| EPGN     | -1.36659 | 0.000978 | 0.005268 | -3.29672 | Down | epithelial mitogen                                           |
| PLEKHS1  | -1.36261 | 0.003129 | 0.013232 | -2.95482 | Down | pleckstrin homology domain containing S1                     |
| CCDC60   | -1.36131 | 0.002295 | 0.010434 | -3.0492  | Down | coiled-coil domain containing 60                             |
| MB       | -1.36073 | 0.001172 | 0.006064 | -3.24555 | Down | myoglobin                                                    |
| LRRC43   | -1.35643 | 5.40E-05 | 0.000536 | -4.03746 | Down | leucine rich repeat containing 43                            |
| CFAP43   | -1.35602 | 0.000327 | 0.00225  | -3.59299 | Down | cilia and flagella associated protein 43                     |
| AGBL2    | -1.3542  | 2.39E-05 | 0.000276 | -4.22534 | Down | AGBL carboxypeptidase 2                                      |
| C22orf15 | -1.34631 | 0.000127 | 0.001082 | -3.83159 | Down | chromosome 22 open reading frame 15                          |
| DLEC1    | -1.34525 | 5.07E-05 | 0.000509 | -4.05253 | Down | DLEC1 cilia and flagella associated protein                  |
| DYDC1    | -1.34524 | 0.008968 | 0.030192 | -2.61325 | Down | DPY30 domain containing 1                                    |
| DYDC2    | -1.34405 | 0.001805 | 0.00862  | -3.12054 | Down | DPY30 domain containing 2                                    |
| ADGB     | -1.34217 | 0.000675 | 0.003934 | -3.39965 | Down | androglobin                                                  |
| TMEM212  | -1.33979 | 0.00466  | 0.018046 | -2.82965 | Down | transmembrane protein 212                                    |
| ACSBG1   | -1.33763 | 0.000931 | 0.005064 | -3.31068 | Down | acyl-CoA synthetase bubblegum family member 1                |
| MROH9    | -1.33754 | 0.001509 | 0.007477 | -3.17291 | Down | maestro heat like repeat family member 9                     |
| PZP      | -1.33684 | 2.07E-05 | 0.000246 | -4.25731 | Down | PZP alpha-2-macroglobulin like                               |
| ANKRD66  | -1.33574 | 0.003085 | 0.013091 | -2.95915 | Down | ankyrin repeat domain 66                                     |
| ABCA13   | -1.33509 | 0.000478 | 0.003008 | -3.49296 | Down | ATP binding cassette subfamily A member 13                   |
| ANKUB1   | -1.3333  | 0.002675 | 0.011754 | -3.00286 | Down | ankyrin repeat and ubiquitin domain containing 1             |
| BDKRB1   | -1.33284 | 0.000232 | 0.001712 | -3.68116 | Down | bradykinin receptor B1                                       |
| SPAG6    | -1.3304  | 0.001799 | 0.008601 | -3.12148 | Down | sperm associated antigen 6                                   |
| RSPH1    | -1.3303  | 0.000694 | 0.004022 | -3.3919  | Down | radial spoke head component 1                                |
| MYCBPAP  | -1.32909 | 2.41E-06 | 4.49E-05 | -4.71546 | Down | MYCBP associated protein                                     |
| VWA3A    | -1.32629 | 3.59E-05 | 0.000389 | -4.13216 | Down | von Willebrand factor A domain containing 3A                 |
| GABRP    | -1.32552 | 7.53E-05 | 0.000709 | -3.95886 | Down | gamma-aminobutyric acid type A receptor subunit pi           |
| CFAP47   | -1.32283 | 0.001507 | 0.007469 | -3.17341 | Down | cilia and flagella associated protein 47                     |
| C6orf118 | -1.3228  | 0.002416 | 0.01082  | -3.03365 | Down | chromosome 6 open reading frame 118                          |
| CCDC17   | -1.32279 | 8.52E-05 | 0.000785 | -3.92928 | Down | coiled-coil domain containing 17                             |
| FAM81B   | -1.31212 | 0.000499 | 0.003103 | -3.48156 | Down | family with sequence similarity 81 member B                  |

|         |          |          |          |          |      |                                                 |
|---------|----------|----------|----------|----------|------|-------------------------------------------------|
| RSPH10B | -1.31186 | 0.004757 | 0.018327 | -2.82307 | Down | radial spoke head 10 homolog B                  |
| SPEF1   | -1.31104 | 0.000973 | 0.005253 | -3.29821 | Down | sperm flagellar 1                               |
| SPATA4  | -1.30741 | 0.001023 | 0.005452 | -3.28412 | Down | spermatogenesis associated 4                    |
| OTX1    | -1.30674 | 0.000497 | 0.003097 | -3.4822  | Down | orthodenticle homeobox 1                        |
| DRC7    | -1.30622 | 0.001482 | 0.007365 | -3.17812 | Down | dynein regulatory complex subunit 7             |
| RIBC1   | -1.30608 | 4.80E-06 | 7.74E-05 | -4.57353 | Down | RIB43A domain with coiled-coils 1               |
| ERICH5  | -1.30256 | 0.000149 | 0.001217 | -3.79204 | Down | glutamate rich 5                                |
| DNAH2   | -1.30031 | 0.000169 | 0.001337 | -3.76169 | Down | dynein axonemal heavy chain 2                   |
| WDR38   | -1.29892 | 0.003196 | 0.013448 | -2.94821 | Down | WD repeat domain 38                             |
| GJB7    | -1.29822 | 0.002715 | 0.011902 | -2.99824 | Down | gap junction protein beta 7                     |
| KRT13   | -1.29734 | 0.000118 | 0.001023 | -3.84955 | Down | keratin 13                                      |
| LRRC46  | -1.29681 | 0.000656 | 0.003851 | -3.40716 | Down | leucine rich repeat containing 46               |
| RP1     | -1.29477 | 0.000189 | 0.001454 | -3.73272 | Down | RP1 axonemal microtubule associated             |
| CIBAR2  | -1.29428 | 0.001191 | 0.006144 | -3.24095 | Down | CBY1 interacting BAR domain containing 2        |
| DNAAF6  | -1.29411 | 0.006765 | 0.024209 | -2.70818 | Down | dynein axonemal assembly factor 6               |
| DNAI3   | -1.29292 | 3.65E-05 | 0.000393 | -4.1289  | Down | dynein axonemal intermediate chain 3            |
| NWD1    | -1.29283 | 0.001982 | 0.009273 | -3.0929  | Down | NACHT and WD repeat domain containing 1         |
| RIBC2   | -1.29249 | 4.48E-05 | 0.000462 | -4.08122 | Down | RIB43A domain with coiled-coils 2               |
| EFCAB12 | -1.29229 | 1.96E-05 | 0.000235 | -4.26974 | Down | EF-hand calcium binding domain 12               |
| GAS2L2  | -1.29167 | 0.000446 | 0.002861 | -3.51141 | Down | growth arrest specific 2 like 2                 |
| TTC29   | -1.29102 | 0.001492 | 0.007403 | -3.17626 | Down | tetratricopeptide repeat domain 29              |
| DNAI2   | -1.29057 | 0.000874 | 0.004816 | -3.32833 | Down | dynein axonemal intermediate chain 2            |
| ECT2L   | -1.28912 | 0.002408 | 0.010794 | -3.03462 | Down | epithelial cell transforming 2 like             |
| TTLL10  | -1.2891  | 0.000215 | 0.001608 | -3.70097 | Down | tubulin tyrosine ligase like 10                 |
| CCDC187 | -1.28712 | 0.002132 | 0.009854 | -3.07126 | Down | coiled-coil domain containing 187               |
| ERICH3  | -1.28616 | 0.002309 | 0.010469 | -3.04734 | Down | glutamate rich 3                                |
| EFHC2   | -1.28458 | 1.47E-06 | 3.02E-05 | -4.81538 | Down | EF-hand domain containing 2                     |
| FABP6   | -1.28364 | 0.00152  | 0.007517 | -3.17076 | Down | fatty acid binding protein 6                    |
| TEKT4   | -1.28364 | 0.003662 | 0.014943 | -2.90589 | Down | tektin 4                                        |
| C2orf50 | -1.28341 | 0.00013  | 0.001103 | -3.8257  | Down | chromosome 2 open reading frame 50              |
| STMND1  | -1.28245 | 0.003482 | 0.014384 | -2.9216  | Down | stathmin domain containing 1                    |
| FAM166B | -1.28221 | 0.000493 | 0.003081 | -3.48439 | Down | family with sequence similarity 166 member B    |
| ZBBX    | -1.28184 | 0.002548 | 0.011283 | -3.01759 | Down | zinc finger B-box domain containing             |
| MORN5   | -1.28089 | 0.004492 | 0.017481 | -2.84138 | Down | MORN repeat containing 5                        |
| FAM83A  | -1.2803  | 0.002422 | 0.010838 | -3.03297 | Down | family with sequence similarity 83 member A     |
| NEK10   | -1.27895 | 0.000178 | 0.001391 | -3.74866 | Down | NIMA related kinase 10                          |
| CNGA4   | -1.27882 | 0.000572 | 0.003464 | -3.4445  | Down | cyclic nucleotide gated channel subunit alpha 4 |
| MDH1B   | -1.27823 | 5.12E-05 | 0.000512 | -4.0499  | Down | malate dehydrogenase 1B                         |
| CFAP141 | -1.27565 | 0.00277  | 0.012071 | -2.99217 | Down | cilia and flagella associated protein 141       |
| DNAAF8  | -1.2744  | 0.000129 | 0.001095 | -3.82832 | Down | dynein axonemal assembly factor 8               |
| DCDC1   | -1.27316 | 0.000707 | 0.00408  | -3.38688 | Down | doublecortin domain containing 1                |
| CDHR3   | -1.27308 | 0.000227 | 0.001688 | -3.68637 | Down | cadherin related family member 3                |
| SCGB1A1 | -1.27268 | 0.003213 | 0.013501 | -2.94662 | Down | secretoglobin family 1A member 1                |

|          |          |          |          |          |      |                                                                   |
|----------|----------|----------|----------|----------|------|-------------------------------------------------------------------|
| DNAH7    | -1.27175 | 8.50E-05 | 0.000784 | -3.92975 | Down | dynein axonemal heavy chain 7                                     |
| CFAP45   | -1.27137 | 7.93E-05 | 0.000741 | -3.94648 | Down | cilia and flagella associated protein 45                          |
| PSCA     | -1.27123 | 0.008256 | 0.028325 | -2.64143 | Down | prostate stem cell antigen                                        |
| USP6     | -1.27031 | 0.000455 | 0.002906 | -3.50588 | Down | ubiquitin specific peptidase 6                                    |
| APOBEC4  | -1.27016 | 0.006425 | 0.023245 | -2.72527 | Down | apolipoprotein B mRNA editing enzyme catalytic polypeptide like 4 |
| SPAG8    | -1.26988 | 8.03E-06 | 0.000117 | -4.46431 | Down | sperm associated antigen 8                                        |
| AGBL4    | -1.26707 | 0.000249 | 0.001808 | -3.66355 | Down | AGBL carboxypeptidase 4                                           |
| WDR93    | -1.26668 | 0.000582 | 0.003517 | -3.4399  | Down | WD repeat domain 93                                               |
| LRRC71   | -1.26666 | 0.000148 | 0.001211 | -3.79497 | Down | leucine rich repeat containing 71                                 |
| CFAP70   | -1.26539 | 6.49E-06 | 9.94E-05 | -4.50988 | Down | cilia and flagella associated protein 70                          |
| FAM216B  | -1.26428 | 0.001632 | 0.007955 | -3.15018 | Down | family with sequence similarity 216 member B                      |
| TTC16    | -1.26272 | 7.16E-06 | 0.000108 | -4.48889 | Down | tetratricopeptide repeat domain 16                                |
| DNAH6    | -1.26032 | 0.000161 | 0.00129  | -3.77332 | Down | dynein axonemal heavy chain 6                                     |
| CCDC78   | -1.25798 | 0.000571 | 0.003463 | -3.44482 | Down | coiled-coil domain containing 78                                  |
| UBXN10   | -1.25719 | 5.46E-06 | 8.61E-05 | -4.54634 | Down | UBX domain protein 10                                             |
| GCNT3    | -1.25692 | 6.43E-06 | 9.87E-05 | -4.51177 | Down | glucosaminyl (N-acetyl) transferase 3, mucin type                 |
| C20orf85 | -1.2563  | 0.005489 | 0.020503 | -2.77685 | Down | chromosome 20 open reading frame 85                               |
| EDN2     | -1.25625 | 0.000162 | 0.001294 | -3.77207 | Down | endothelin 2                                                      |
| CFAP61   | -1.25619 | 0.000714 | 0.004108 | -3.3841  | Down | cilia and flagella associated protein 61                          |
| ANKFN1   | -1.25432 | 8.12E-05 | 0.000754 | -3.94087 | Down | ankyrin repeat and fibronectin type III domain containing 1       |
| CFAP126  | -1.25128 | 0.002919 | 0.012556 | -2.97612 | Down | cilia and flagella associated protein 126                         |
| ZMYND10  | -1.24945 | 0.000411 | 0.002684 | -3.53271 | Down | zinc finger MYND-type containing 10                               |
| HHATL    | -1.2478  | 0.000479 | 0.003016 | -3.49204 | Down | hedgehog acyltransferase like                                     |
| TSPAN1   | -1.24767 | 0.000416 | 0.00271  | -3.52965 | Down | tetraspanin 1                                                     |
| DNAI7    | -1.24575 | 0.00014  | 0.001165 | -3.80789 | Down | dynein axonemal intermediate chain 7                              |
| ODAD2    | -1.24463 | 0.000751 | 0.004289 | -3.37038 | Down | outer dynein arm docking complex subunit 2                        |
| TSNAXIP1 | -1.2444  | 1.97E-06 | 3.84E-05 | -4.7567  | Down | translin associated factor X interacting protein 1                |
| TCTE1    | -1.24393 | 0.001099 | 0.005778 | -3.26384 | Down | t-complex-associated-testis-expressed 1                           |
| CWH43    | -1.24198 | 0.009091 | 0.030497 | -2.6086  | Down | cell wall biogenesis 43 C-terminal homolog                        |
| CFAP251  | -1.23807 | 3.61E-05 | 0.00039  | -4.13124 | Down | cilia and flagella associated protein 251                         |
| SRD5A2   | -1.2364  | 0.003639 | 0.014872 | -2.90788 | Down | steroid 5 alpha-reductase 2                                       |
| FAM183A  | -1.23568 | 0.004204 | 0.016612 | -2.86247 | Down | family with sequence similarity 183 member A                      |
| ZNF474   | -1.23323 | 0.000243 | 0.001775 | -3.66941 | Down | zinc finger protein 474                                           |
| ENO4     | -1.23284 | 2.30E-05 | 0.000268 | -4.23333 | Down | enolase 4                                                         |
| ODAD3    | -1.23187 | 0.000116 | 0.001008 | -3.8538  | Down | outer dynein arm docking complex subunit 3                        |
| GRIN3B   | -1.23008 | 0.000979 | 0.00527  | -3.29645 | Down | glutamate ionotropic receptor NMDA type subunit 3B                |
| PRMT8    | -1.22706 | 1.24E-05 | 0.000165 | -4.36969 | Down | protein arginine methyltransferase 8                              |
| MAPK15   | -1.22543 | 5.48E-05 | 0.000542 | -4.03425 | Down | mitogen-activated protein kinase 15                               |
| RSPH4A   | -1.22495 | 0.000346 | 0.002357 | -3.57791 | Down | radial spoke head component 4A                                    |
| DYNLT4   | -1.22382 | 0.001851 | 0.008793 | -3.1132  | Down | dynein light chain Tctex-type 4                                   |
| CHST9    | -1.22362 | 0.008836 | 0.029834 | -2.61833 | Down | carbohydrate sulfotransferase 9                                   |
| B3GALT5  | -1.22351 | 0.001658 | 0.008047 | -3.14559 | Down | beta-1,3-galactosyltransferase 5                                  |
| CATSPERD | -1.22284 | 0.005532 | 0.020643 | -2.77431 | Down | cation channel sperm associated auxiliary subunit delta           |



|          |          |          |          |          |      |                                                   |
|----------|----------|----------|----------|----------|------|---------------------------------------------------|
| CLDN2    | -1.22151 | 0.000289 | 0.00204  | -3.62539 | Down | claudin 2                                         |
| MMP3     | -1.21893 | 0.002787 | 0.012127 | -2.99031 | Down | matrix metallopeptidase 3                         |
| FBXO15   | -1.21725 | 0.00011  | 0.000963 | -3.86761 | Down | F-box protein 15                                  |
| FANK1    | -1.21713 | 4.60E-06 | 7.52E-05 | -4.58221 | Down | fibronectin type III and ankyrin repeat domains 1 |
| CFAP20DC | -1.21592 | 8.34E-06 | 0.000121 | -4.45625 | Down | CFAP20 domain containing                          |
| PTPRT    | -1.21543 | 0.001025 | 0.00546  | -3.28359 | Down | protein tyrosine phosphatase receptor type T      |
| ERN2     | -1.2141  | 0.008276 | 0.028388 | -2.6406  | Down | endoplasmic reticulum to nucleus signaling 2      |
| UCN3     | -1.21302 | 0.002498 | 0.011111 | -3.02357 | Down | urocortin 3                                       |
| CCDC74A  | -1.2121  | 2.11E-06 | 4.02E-05 | -4.74279 | Down | coiled-coil domain containing 74A                 |
| PIFO     | -1.2117  | 7.11E-05 | 0.000676 | -3.9726  | Down | primary cilia formation                           |
| C4orf47  | -1.21169 | 3.94E-05 | 0.000416 | -4.1107  | Down | chromosome 4 open reading frame 47                |
| SLC5A5   | -1.21148 | 0.011615 | 0.037229 | -2.52364 | Down | solute carrier family 5 member 5                  |
| FUT6     | -1.21098 | 0.001976 | 0.009252 | -3.09385 | Down | fucosyltransferase 6                              |
| DNAAF3   | -1.21041 | 0.000819 | 0.004595 | -3.34632 | Down | dynein axonemal assembly factor 3                 |
| FAM227A  | -1.20805 | 4.98E-06 | 7.99E-05 | -4.56579 | Down | family with sequence similarity 227 member A      |
| ENKUR    | -1.20729 | 0.002356 | 0.010623 | -3.04127 | Down | enkurin, TRPC channel interacting protein         |
| UCN2     | -1.20719 | 0.000531 | 0.003263 | -3.46449 | Down | urocortin 2                                       |
| CFAP210  | -1.20648 | 0.000229 | 0.001692 | -3.68471 | Down | cilia and flagella associated protein 210         |
| TOGARAM2 | -1.20565 | 1.10E-05 | 0.00015  | -4.39719 | Down | TOG array regulator of axonemal microtubules 2    |
| ROPN1L   | -1.20441 | 0.000491 | 0.003075 | -3.48548 | Down | rhophilin associated tail protein 1 like          |
| IQCD     | -1.20391 | 1.99E-05 | 0.000239 | -4.26605 | Down | IQ motif containing D                             |
| SCGB2A1  | -1.20224 | 0.003315 | 0.01385  | -2.9369  | Down | secretoglobin family 2A member 1                  |
| C5orf49  | -1.20221 | 0.001575 | 0.007725 | -3.16053 | Down | chromosome 5 open reading frame 49                |
| WDR49    | -1.20137 | 7.45E-05 | 0.000703 | -3.96139 | Down | WD repeat domain 49                               |
| DIO1     | -1.19999 | 0.00133  | 0.006745 | -3.2095  | Down | iodothyronine deiodinase 1                        |
| CLXN     | -1.1998  | 0.001452 | 0.007253 | -3.18418 | Down | calaxin                                           |
| ODAD4    | -1.19926 | 5.32E-05 | 0.000529 | -4.0412  | Down | outer dynein arm docking complex subunit 4        |
| DYNLRB2  | -1.19841 | 0.000843 | 0.004698 | -3.33828 | Down | dynein light chain roadblock-type 2               |
| MAT1A    | -1.19807 | 0.000202 | 0.001533 | -3.71628 | Down | methionine adenosyltransferase 1A                 |
| DAW1     | -1.1971  | 0.000236 | 0.001729 | -3.67752 | Down | dynein assembly factor with WD repeats 1          |
| RSPH9    | -1.19318 | 0.000572 | 0.003465 | -3.44432 | Down | radial spoke head component 9                     |
| C2orf73  | -1.19263 | 0.001074 | 0.005675 | -3.27027 | Down | chromosome 2 open reading frame 73                |
| CCDC74B  | -1.19213 | 0.000263 | 0.00189  | -3.64962 | Down | coiled-coil domain containing 74B                 |
| CATIP    | -1.19199 | 0.000662 | 0.003876 | -3.40465 | Down | ciliogenesis associated TTC17 interacting protein |
| MEIG1    | -1.19089 | 0.000534 | 0.003273 | -3.46332 | Down | meiosis/spermiogenesis associated 1               |
| C9orf24  | -1.18449 | 0.003995 | 0.015963 | -2.87858 | Down | chromosome 9 open reading frame 24                |
| SPATA17  | -1.18378 | 0.000318 | 0.002201 | -3.60012 | Down | spermatogenesis associated 17                     |
| C22orf23 | -1.18097 | 0.000609 | 0.003639 | -3.42752 | Down | chromosome 22 open reading frame 23               |
| EYA1     | -1.17966 | 0.002377 | 0.010695 | -3.03852 | Down | EYA transcriptional coactivator and phosphatase 1 |
| SAXO2    | -1.17876 | 0.001244 | 0.006352 | -3.22855 | Down | stabilizer of axonemal microtubules 2             |
| SLC9C2   | -1.17675 | 0.000687 | 0.003993 | -3.39472 | Down | solute carrier family 9 member C2 (putative)      |
| SERPINB2 | -1.17644 | 0.00043  | 0.002783 | -3.52097 | Down | serpin family B member 2                          |
| CFAP58   | -1.17636 | 1.17E-05 | 0.000158 | -4.38251 | Down | cilia and flagella associated protein 58          |

|          |          |          |          |          |      |                                                          |
|----------|----------|----------|----------|----------|------|----------------------------------------------------------|
| CFAP276  | -1.17603 | 0.006634 | 0.023824 | -2.71467 | Down | cilia and flagella associated protein 276                |
| HHLA2    | -1.17311 | 0.000367 | 0.002457 | -3.56305 | Down | HERV-H LTR-associating 2                                 |
| SPINK1   | -1.17164 | 0.000126 | 0.001075 | -3.83393 | Down | serine peptidase inhibitor Kazal type 1                  |
| TP53AIP1 | -1.17143 | 0.009439 | 0.03137  | -2.59574 | Down | tumor protein p53 regulated apoptosis inducing protein 1 |
| CFAP73   | -1.16955 | 0.005474 | 0.020459 | -2.77772 | Down | cilia and flagella associated protein 73                 |
| FHAD1    | -1.16916 | 1.18E-05 | 0.000159 | -4.38079 | Down | forkhead associated phosphopeptide binding domain 1      |
| DOC2A    | -1.16838 | 9.22E-05 | 0.000837 | -3.91017 | Down | double C2 domain alpha                                   |
| AK8      | -1.16742 | 4.22E-05 | 0.00044  | -4.09531 | Down | adenylate kinase 8                                       |
| CFAP77   | -1.16694 | 0.008641 | 0.029367 | -2.62592 | Down | cilia and flagella associated protein 77                 |
| TEKT3    | -1.16139 | 5.50E-06 | 8.64E-05 | -4.54481 | Down | tektin 3                                                 |
| PADI1    | -1.15872 | 0.006604 | 0.023739 | -2.71618 | Down | peptidyl arginine deiminase 1                            |
| TEX26    | -1.15645 | 0.004312 | 0.016899 | -2.85438 | Down | testis expressed 26                                      |
| ADH6     | -1.15524 | 0.006078 | 0.022267 | -2.74355 | Down | alcohol dehydrogenase 6 (class V)                        |
| SYT8     | -1.15473 | 0.000413 | 0.002692 | -3.53166 | Down | synaptotagmin 8                                          |
| STOX1    | -1.1533  | 5.01E-05 | 0.000505 | -4.05514 | Down | storkhead box 1                                          |
| CCDC181  | -1.15284 | 9.16E-05 | 0.000832 | -3.91177 | Down | coiled-coil domain containing 181                        |
| CCDC113  | -1.15014 | 0.000178 | 0.001392 | -3.7482  | Down | coiled-coil domain containing 113                        |
| B4GALNT2 | -1.14954 | 0.004071 | 0.016182 | -2.8726  | Down | beta-1,4-N-acetyl-galactosaminyltransferase 2            |
| ADGRF4   | -1.14779 | 9.28E-06 | 0.000131 | -4.43339 | Down | adhesion G protein-coupled receptor F4                   |
| CERKL    | -1.14748 | 0.00367  | 0.01496  | -2.9052  | Down | ceramide kinase like                                     |
| PRR15    | -1.14658 | 7.68E-05 | 0.000722 | -3.95427 | Down | proline rich 15                                          |
| DTHD1    | -1.14631 | 0.000279 | 0.001984 | -3.63412 | Down | death domain containing 1                                |
| CACNG6   | -1.14249 | 0.005269 | 0.019879 | -2.79012 | Down | calcium voltage-gated channel auxiliary subunit gamma 6  |
| TMEM59L  | -1.13978 | 2.30E-06 | 4.32E-05 | -4.72507 | Down | transmembrane protein 59 like                            |
| C6       | -1.13956 | 0.000394 | 0.002594 | -3.54394 | Down | complement C6                                            |
| HABP2    | -1.13756 | 1.02E-05 | 0.000141 | -4.41367 | Down | hyaluronan binding protein 2                             |
| CRISP2   | -1.13533 | 0.012356 | 0.039083 | -2.50181 | Down | cysteine rich secretory protein 2                        |
| EFCAB10  | -1.13448 | 0.003792 | 0.015326 | -2.895   | Down | EF-hand calcium binding domain 10                        |
| IQUB     | -1.13375 | 5.00E-05 | 0.000505 | -4.05547 | Down | IQ motif and ubiquitin domain containing                 |
| KIF19    | -1.13353 | 0.000501 | 0.003116 | -3.48005 | Down | kinesin family member 19                                 |
| DKK1     | -1.13148 | 3.05E-05 | 0.000337 | -4.16992 | Down | dickkopf WNT signaling pathway inhibitor 1               |
| PACRG    | -1.13086 | 0.000308 | 0.002144 | -3.6088  | Down | parkin coregulated                                       |
| TMPRSS4  | -1.128   | 0.006734 | 0.024116 | -2.7097  | Down | transmembrane serine protease 4                          |
| GSTA1    | -1.12601 | 0.001897 | 0.008968 | -3.10598 | Down | glutathione S-transferase alpha 1                        |
| CNGA3    | -1.12501 | 0.001433 | 0.007188 | -3.18795 | Down | cyclic nucleotide gated channel subunit alpha 3          |
| TTC23L   | -1.12483 | 0.00011  | 0.000966 | -3.86674 | Down | tetratricopeptide repeat domain 23 like                  |
| FAM166C  | -1.12401 | 0.005399 | 0.020246 | -2.78224 | Down | family with sequence similarity 166 member C             |
| CCDC40   | -1.12323 | 1.87E-07 | 5.31E-06 | -5.21164 | Down | coiled-coil domain containing 40                         |
| ABCA12   | -1.12219 | 0.005197 | 0.019675 | -2.79459 | Down | ATP binding cassette subfamily A member 12               |
| CD164L2  | -1.11777 | 0.000871 | 0.004806 | -3.32929 | Down | CD164 molecule like 2                                    |
| CNTD1    | -1.11691 | 0.00068  | 0.003959 | -3.39754 | Down | cyclin N-terminal domain containing 1                    |
| SNTN     | -1.11613 | 0.009289 | 0.030996 | -2.60124 | Down | sentan, cilia apical structure protein                   |
| TP73     | -1.1153  | 0.000772 | 0.004383 | -3.36248 | Down | tumor protein p73                                        |

|            |          |          |          |          |      |                                                                 |
|------------|----------|----------|----------|----------|------|-----------------------------------------------------------------|
| EFHB       | -1.11404 | 0.000506 | 0.003136 | -3.47762 | Down | EF-hand domain family member B                                  |
| DNAH5      | -1.11302 | 0.000316 | 0.002187 | -3.60203 | Down | dynein axonemal heavy chain 5                                   |
| FOXJ1      | -1.10527 | 0.001938 | 0.009125 | -3.09964 | Down | forkhead box J1                                                 |
| FAM83F     | -1.1039  | 0.001099 | 0.005778 | -3.2639  | Down | family with sequence similarity 83 member F                     |
| KLHDC8A    | -1.09928 | 2.24E-08 | 9.22E-07 | -5.59257 | Down | kelch domain containing 8A                                      |
| DQX1       | -1.09807 | 0.000133 | 0.001123 | -3.82003 | Down | DEAQ-box RNA dependent ATPase 1                                 |
| EFCAB6     | -1.09785 | 1.73E-05 | 0.000215 | -4.29657 | Down | EF-hand calcium binding domain 6                                |
| DNAI4      | -1.09759 | 5.79E-05 | 0.000567 | -4.0211  | Down | dynein axonemal intermediate chain 4                            |
| BCAS1      | -1.09707 | 3.88E-05 | 0.00041  | -4.11475 | Down | brain enriched myelin associated protein 1                      |
| KCNH3      | -1.09646 | 0.000154 | 0.001245 | -3.78533 | Down | potassium voltage-gated channel subfamily H member 3            |
| HRK        | -1.09406 | 0.000449 | 0.002876 | -3.50922 | Down | harakiri, BCL2 interacting protein                              |
| KRT15      | -1.0888  | 0.004994 | 0.019065 | -2.80744 | Down | keratin 15                                                      |
| CFAP95     | -1.08817 | 0.011679 | 0.037394 | -2.52171 | Down | cilia and flagella associated protein 95                        |
| GDA        | -1.088   | 0.001904 | 0.008999 | -3.10477 | Down | guanine deaminase                                               |
| CCDC170    | -1.08763 | 0.000115 | 0.001002 | -3.85579 | Down | coiled-coil domain containing 170                               |
| NEK5       | -1.08554 | 0.00117  | 0.006055 | -3.24617 | Down | NIMA related kinase 5                                           |
| SRCIN1     | -1.08486 | 3.27E-05 | 0.000357 | -4.15403 | Down | SRC kinase signaling inhibitor 1                                |
| PLPPR3     | -1.08439 | 0.000116 | 0.001004 | -3.85492 | Down | phospholipid phosphatase related 3                              |
| FLACC1     | -1.08245 | 1.30E-05 | 0.000172 | -4.35932 | Down | flagellum associated containing coiled-coil domains 1           |
| SLC44A4    | -1.0824  | 7.81E-05 | 0.000731 | -3.95013 | Down | solute carrier family 44 member 4                               |
| CAPN13     | -1.07803 | 0.000176 | 0.001379 | -3.7511  | Down | calpain 13                                                      |
| RIIAD1     | -1.07622 | 0.001656 | 0.008044 | -3.14581 | Down | regulatory subunit of type II PKA R-subunit domain containing 1 |
| PROM1      | -1.07323 | 0.007456 | 0.026105 | -2.67575 | Down | prominin 1                                                      |
| DAPL1      | -1.07169 | 0.000781 | 0.004423 | -3.35935 | Down | death associated protein like 1                                 |
| STK33      | -1.06761 | 3.21E-06 | 5.67E-05 | -4.65706 | Down | serine/threonine kinase 33                                      |
| ZG16B      | -1.06641 | 0.000223 | 0.001663 | -3.69092 | Down | zymogen granule protein 16B                                     |
| PLEKHG7    | -1.06558 | 0.004696 | 0.018155 | -2.82716 | Down | pleckstrin homology and RhoGEF domain containing G7             |
| ST6GALNAC1 | -1.06379 | 9.70E-05 | 0.000869 | -3.89793 | Down | ST6 N-acetylgalactosaminide alpha-2,6-sialyltransferase 1       |
| PIERCE1    | -1.06323 | 0.000714 | 0.004108 | -3.38432 | Down | piercer of microtubule wall 1                                   |
| STRA6      | -1.0627  | 0.005113 | 0.019417 | -2.79981 | Down | signaling receptor and transporter of retinol STRA6             |
| ATG9B      | -1.05961 | 2.82E-06 | 5.13E-05 | -4.6837  | Down | autophagy related 9B                                            |
| IGFL2      | -1.05744 | 0.010801 | 0.035002 | -2.54906 | Down | IGF like family member 2                                        |
| CFAP54     | -1.05536 | 0.000301 | 0.002114 | -3.61409 | Down | cilia and flagella associated protein 54                        |
| ADGRA1     | -1.05248 | 0.010302 | 0.033689 | -2.56551 | Down | adhesion G protein-coupled receptor A1                          |
| IL5RA      | -1.04946 | 0.000141 | 0.00117  | -3.80676 | Down | interleukin 5 receptor subunit alpha                            |
| PLCH2      | -1.04808 | 0.00037  | 0.00247  | -3.5607  | Down | phospholipase C eta 2                                           |
| CCDC146    | -1.04496 | 5.75E-06 | 8.96E-05 | -4.53555 | Down | coiled-coil domain containing 146                               |
| ESPN       | -1.04207 | 0.002398 | 0.010762 | -3.03592 | Down | espin                                                           |
| MS4A6E     | -1.04063 | 0.000612 | 0.003653 | -3.4261  | Down | membrane spanning 4-domains A6E                                 |
| AK7        | -1.0404  | 0.000369 | 0.00247  | -3.5612  | Down | adenylate kinase 7                                              |
| TRIM29     | -1.03912 | 0.003545 | 0.014579 | -2.91606 | Down | tripartite motif containing 29                                  |
| SLC27A2    | -1.03893 | 0.000163 | 0.001296 | -3.77111 | Down | solute carrier family 27 member 2                               |
| FNDC11     | -1.03681 | 1.84E-05 | 0.000225 | -4.28338 | Down | fibronectin type III domain containing 11                       |

|          |          |          |          |          |      |                                                               |
|----------|----------|----------|----------|----------|------|---------------------------------------------------------------|
| LRRC10B  | -1.03593 | 0.001746 | 0.008397 | -3.13028 | Down | leucine rich repeat containing 10B                            |
| PIH1D2   | -1.03507 | 9.85E-05 | 0.000878 | -3.89437 | Down | PIH1 domain containing 2                                      |
| MYEOV    | -1.03486 | 4.34E-06 | 7.22E-05 | -4.5943  | Down | myeloma overexpressed                                         |
| C21orf58 | -1.03222 | 7.77E-06 | 0.000115 | -4.47142 | Down | chromosome 21 open reading frame 58                           |
| MUC4     | -1.03108 | 0.004543 | 0.017662 | -2.83778 | Down | mucin 4, cell surface associated                              |
| AKR1B10  | -1.02869 | 0.010298 | 0.033683 | -2.56565 | Down | aldo-keto reductase family 1 member B10                       |
| NGEF     | -1.02805 | 0.000166 | 0.00132  | -3.76571 | Down | neuronal guanine nucleotide exchange factor                   |
| FMO6P    | -1.02723 | 0.00093  | 0.005063 | -3.31082 | Down | flavin containing dimethylaniline monooxygenase 6, pseudogene |
| LRRC73   | -1.02529 | 0.000748 | 0.004279 | -3.3713  | Down | leucine rich repeat containing 73                             |
| MKRN2OS  | -1.02094 | 0.000149 | 0.001216 | -3.7925  | Down | MKRN2 opposite strand                                         |
| MNS1     | -1.02025 | 9.44E-06 | 0.000133 | -4.42967 | Down | meiosis specific nuclear structural 1                         |
| WNK2     | -1.02004 | 7.49E-05 | 0.000706 | -3.96016 | Down | WNK lysine deficient protein kinase 2                         |
| MAP7D2   | -1.01976 | 1.42E-05 | 0.000183 | -4.34095 | Down | MAP7 domain containing 2                                      |
| TFF3     | -1.01964 | 1.17E-05 | 0.000158 | -4.38226 | Down | trefoil factor 3                                              |
| SMKR1    | -1.01824 | 0.000989 | 0.005309 | -3.2936  | Down | small lysine rich protein 1                                   |
| FUT2     | -1.01568 | 0.005212 | 0.019714 | -2.79362 | Down | fucosyltransferase 2                                          |
| NEK11    | -1.01463 | 1.26E-07 | 3.92E-06 | -5.28403 | Down | NIMA related kinase 11                                        |
| GBP6     | -1.01023 | 0.002269 | 0.010363 | -3.05252 | Down | guanylate binding protein family member 6                     |
| AWAT2    | -1.0091  | 0.009876 | 0.032584 | -2.58015 | Down | acyl-CoA wax alcohol acyltransferase 2                        |
| LGSN     | -1.00862 | 0.009519 | 0.031578 | -2.59285 | Down | lensin, lens protein with glutamine synthetase domain         |
| LRGUK    | -1.00809 | 2.45E-05 | 0.000282 | -4.2191  | Down | leucine rich repeats and guanylate kinase domain containing   |
| OXTR     | -1.00701 | 0.00111  | 0.005819 | -3.26095 | Down | oxytocin receptor                                             |
| BBOX1    | -1.00514 | 0.006213 | 0.022665 | -2.7363  | Down | gamma-butyrobetaine hydroxylase 1                             |
| CRLF1    | -1.00066 | 9.46E-07 | 2.06E-05 | -4.9025  | Down | cytokine receptor like factor 1                               |
| PLPP2    | -0.99867 | 0.000111 | 0.000968 | -3.86577 | Down | phospholipid phosphatase 2                                    |
| FAM83B   | -0.99858 | 0.010338 | 0.033762 | -2.56431 | Down | family with sequence similarity 83 member B                   |
| TTLL6    | -0.99754 | 0.000662 | 0.003874 | -3.40497 | Down | tubulin tyrosine ligase like 6                                |
| CCL24    | -0.99685 | 0.000854 | 0.00474  | -3.33472 | Down | C-C motif chemokine ligand 24                                 |
| KIF6     | -0.99482 | 6.42E-05 | 0.000621 | -3.99672 | Down | kinesin family member 6                                       |
| KIF24    | -0.99098 | 6.44E-06 | 9.88E-05 | -4.51136 | Down | kinesin family member 24                                      |
| KPNA7    | -0.99077 | 0.000135 | 0.00113  | -3.81773 | Down | karyopherin subunit alpha 7                                   |
| IQCG     | -0.98968 | 5.78E-07 | 1.36E-05 | -4.99827 | Down | IQ motif containing G                                         |
| HCAR1    | -0.988   | 0.002418 | 0.010826 | -3.03339 | Down | hydroxycarboxylic acid receptor 1                             |
| GJB3     | -0.98636 | 0.001062 | 0.005621 | -3.27361 | Down | gap junction protein beta 3                                   |
| MMP19    | -0.98401 | 1.40E-05 | 0.000182 | -4.34371 | Down | matrix metalloproteinase 19                                   |
| GRIK2    | -0.98255 | 0.000761 | 0.004331 | -3.36676 | Down | glutamate ionotropic receptor kainate type subunit 2          |
| CFAP161  | -0.97917 | 0.000312 | 0.00217  | -3.60487 | Down | cilia and flagella associated protein 161                     |
| LRRIQ1   | -0.97829 | 0.007501 | 0.026226 | -2.67373 | Down | leucine rich repeats and IQ motif containing 1                |
| B3GNT3   | -0.97384 | 0.002348 | 0.010595 | -3.04224 | Down | UDP-GlcNAc:betaGal beta-1,3-N-acetylglucosaminyltransferase 3 |
| SERPINI2 | -0.97241 | 0.000695 | 0.004023 | -3.39173 | Down | serpin family I member 2                                      |
| SLC52A1  | -0.97049 | 0.001305 | 0.006633 | -3.21498 | Down | solute carrier family 52 member 1                             |
| TPPP3    | -0.96586 | 2.22E-05 | 0.000261 | -4.24107 | Down | tubulin polymerization promoting protein family member 3      |
| PPIL6    | -0.96304 | 0.000556 | 0.003384 | -3.45232 | Down | peptidylprolyl isomerase like 6                               |

|          |          |          |          |          |      |                                                  |
|----------|----------|----------|----------|----------|------|--------------------------------------------------|
| H2BC26   | -0.96143 | 0.003048 | 0.012976 | -2.96284 | Down | H2B clustered histone 26                         |
| CP       | -0.96137 | 0.000819 | 0.004595 | -3.34633 | Down | ceruloplasmin                                    |
| ANKK1    | -0.96132 | 0.000322 | 0.002219 | -3.59714 | Down | ankyrin repeat and kinase domain containing 1    |
| GSTA3    | -0.96087 | 0.015122 | 0.046014 | -2.42944 | Down | glutathione S-transferase alpha 3                |
| GLB1L3   | -0.95966 | 0.015105 | 0.045972 | -2.42985 | Down | galactosidase beta 1 like 3                      |
| CHST6    | -0.95939 | 0.001305 | 0.006634 | -3.21483 | Down | carbohydrate sulfotransferase 6                  |
| TMEM184A | -0.95888 | 9.31E-06 | 0.000132 | -4.4326  | Down | transmembrane protein 184A                       |
| CLDN16   | -0.95866 | 0.007814 | 0.02711  | -2.66002 | Down | claudin 16                                       |
| IQCH     | -0.95788 | 3.00E-05 | 0.000332 | -4.17371 | Down | IQ motif containing H                            |
| TMEM231  | -0.9565  | 2.98E-05 | 0.000331 | -4.17518 | Down | transmembrane protein 231                        |
| PKP2     | -0.95464 | 6.17E-06 | 9.53E-05 | -4.52044 | Down | plakophilin 2                                    |
| CFAP119  | -0.95261 | 7.98E-06 | 0.000117 | -4.46562 | Down | cilia and flagella associated protein 119        |
| COL7A1   | -0.95221 | 0.000335 | 0.002293 | -3.58693 | Down | collagen type VII alpha 1 chain                  |
| LHCGR    | -0.95083 | 0.004024 | 0.016032 | -2.8763  | Down | luteinizing hormone/choriogonadotropin receptor  |
| KCNRG    | -0.94981 | 0.003161 | 0.013339 | -2.95163 | Down | potassium channel regulator                      |
| EPN3     | -0.94674 | 0.007764 | 0.026974 | -2.66218 | Down | epsin 3                                          |
| AQP5     | -0.94586 | 0.001798 | 0.008599 | -3.12164 | Down | aquaporin 5                                      |
| NME5     | -0.94235 | 0.000124 | 0.001063 | -3.83767 | Down | NME/NM23 family member 5                         |
| HNF4G    | -0.94189 | 0.009498 | 0.031527 | -2.5936  | Down | hepatocyte nuclear factor 4 gamma                |
| GRM7     | -0.94082 | 0.0043   | 0.016875 | -2.85524 | Down | glutamate metabotropic receptor 7                |
| CYP2J2   | -0.94054 | 0.000266 | 0.001907 | -3.64628 | Down | cytochrome P450 family 2 subfamily J member 2    |
| ALG1L1P  | -0.93963 | 0.00312  | 0.013205 | -2.95569 | Down | ALG1 like 1, pseudogene                          |
| RAB3B    | -0.93872 | 0.001739 | 0.008373 | -3.13159 | Down | RAB3B, member RAS oncogene family                |
| BAIAP3   | -0.9376  | 0.000125 | 0.001066 | -3.83686 | Down | BAI1 associated protein 3                        |
| SYT13    | -0.93707 | 0.000652 | 0.003834 | -3.40911 | Down | synaptotagmin 13                                 |
| CRABP2   | -0.93442 | 0.000256 | 0.001849 | -3.65635 | Down | cellular retinoic acid binding protein 2         |
| LRRC23   | -0.93392 | 0.000157 | 0.001264 | -3.78015 | Down | leucine rich repeat containing 23                |
| CCDC153  | -0.93317 | 3.78E-05 | 0.000403 | -4.12052 | Down | coiled-coil domain containing 153                |
| DNAAF11  | -0.93289 | 4.02E-06 | 6.81E-05 | -4.61031 | Down | dynein axonemal assembly factor 11               |
| KLK13    | -0.92961 | 0.009131 | 0.030602 | -2.60712 | Down | kallikrein related peptidase 13                  |
| SAMD15   | -0.92506 | 0.000928 | 0.005053 | -3.31154 | Down | sterile alpha motif domain containing 15         |
| OMG      | -0.92423 | 0.000255 | 0.001848 | -3.65684 | Down | oligodendrocyte myelin glycoprotein              |
| SPACA9   | -0.92267 | 2.62E-05 | 0.000298 | -4.20446 | Down | sperm acrosome associated 9                      |
| CABCOCO1 | -0.92177 | 0.001385 | 0.006976 | -3.19767 | Down | ciliary associated calcium binding coiled-coil 1 |
| LRRC56   | -0.9206  | 8.93E-06 | 0.000128 | -4.44146 | Down | leucine rich repeat containing 56                |
| PPP1R36  | -0.91998 | 8.66E-05 | 0.000795 | -3.92549 | Down | protein phosphatase 1 regulatory subunit 36      |
| DEGS2    | -0.91768 | 0.00084  | 0.004692 | -3.33925 | Down | delta 4-desaturase, sphingolipid 2               |
| GIPR     | -0.91692 | 4.01E-05 | 0.000421 | -4.10684 | Down | gastric inhibitory polypeptide receptor          |
| KIAA0319 | -0.91661 | 0.0003   | 0.002104 | -3.61554 | Down | KIAA0319                                         |
| CCDC81   | -0.9128  | 0.001112 | 0.005823 | -3.26055 | Down | coiled-coil domain containing 81                 |
| CAPS     | -0.91114 | 0.000927 | 0.005052 | -3.31175 | Down | calcyphosine                                     |
| ZCCHC12  | -0.91021 | 0.000843 | 0.004698 | -3.33838 | Down | zinc finger CCHC-type containing 12              |
| CCDC157  | -0.90985 | 1.25E-06 | 2.63E-05 | -4.84801 | Down | coiled-coil domain containing 157                |

|          |          |          |          |          |      |                                                                  |
|----------|----------|----------|----------|----------|------|------------------------------------------------------------------|
| MORN3    | -0.90908 | 0.000183 | 0.001415 | -3.74199 | Down | MORN repeat containing 3                                         |
| INSYN2A  | -0.90908 | 0.001007 | 0.005382 | -3.28864 | Down | inhibitory synaptic factor 2A                                    |
| ELF3     | -0.90836 | 0.000135 | 0.00113  | -3.8178  | Down | E74 like ETS transcription factor 3                              |
| RAB36    | -0.90607 | 0.000118 | 0.001017 | -3.85125 | Down | RAB36, member RAS oncogene family                                |
| TSGA10   | -0.90503 | 0.000263 | 0.00189  | -3.64964 | Down | testis specific 10                                               |
| CSMD1    | -0.90479 | 0.000627 | 0.003719 | -3.41964 | Down | CUB and Sushi multiple domains 1                                 |
| ZDHHC11  | -0.90465 | 8.97E-07 | 1.99E-05 | -4.91309 | Down | zinc finger DHHC-type containing 11                              |
| ARHGAP39 | -0.90445 | 1.51E-05 | 0.000193 | -4.32788 | Down | Rho GTPase activating protein 39                                 |
| TMEM232  | -0.90113 | 0.003606 | 0.014768 | -2.91068 | Down | transmembrane protein 232                                        |
| KLHL32   | -0.89377 | 0.002938 | 0.012613 | -2.97417 | Down | kelch like family member 32                                      |
| KLK14    | -0.89277 | 0.000229 | 0.001691 | -3.685   | Down | kallikrein related peptidase 14                                  |
| SRGAP3   | -0.89163 | 3.70E-05 | 0.000398 | -4.12545 | Down | SLIT-ROBO Rho GTPase activating protein 3                        |
| CDH3     | -0.89152 | 0.000211 | 0.001581 | -3.70587 | Down | cadherin 3                                                       |
| SLC28A3  | -0.88983 | 0.000152 | 0.001235 | -3.78784 | Down | solute carrier family 28 member 3                                |
| GPR156   | -0.88904 | 9.99E-05 | 0.000888 | -3.8909  | Down | G protein-coupled receptor 156                                   |
| SPDEF    | -0.88422 | 0.003353 | 0.013967 | -2.93341 | Down | SAM pointed domain containing ETS transcription factor           |
| MAK      | -0.88349 | 0.001961 | 0.009208 | -3.096   | Down | male germ cell associated kinase                                 |
| WNK4     | -0.8826  | 0.011778 | 0.03764  | -2.51872 | Down | WNK lysine deficient protein kinase 4                            |
| LEKR1    | -0.88245 | 0.000468 | 0.00296  | -3.49862 | Down | leucine, glutamate and lysine rich 1                             |
| NHLRC4   | -0.8819  | 0.000333 | 0.002287 | -3.58798 | Down | NHL repeat containing 4                                          |
| RGS22    | -0.88159 | 0.000513 | 0.00317  | -3.47386 | Down | regulator of G protein signaling 22                              |
| CCDC96   | -0.88148 | 0.000237 | 0.001739 | -3.67578 | Down | coiled-coil domain containing 96                                 |
| EFNB3    | -0.88045 | 0.000195 | 0.001486 | -3.72532 | Down | ephrin B3                                                        |
| TTC21A   | -0.87693 | 5.90E-07 | 1.38E-05 | -4.99437 | Down | tetratricopeptide repeat domain 21A                              |
| DEFB124  | -0.87665 | 0.001071 | 0.005659 | -3.27129 | Down | defensin beta 124                                                |
| SCG5     | -0.87254 | 0.000219 | 0.001634 | -3.69646 | Down | secretogranin V                                                  |
| CYP27C1  | -0.87203 | 0.007185 | 0.025388 | -2.68817 | Down | cytochrome P450 family 27 subfamily C member 1                   |
| CCDC30   | -0.86754 | 1.87E-06 | 3.70E-05 | -4.76658 | Down | coiled-coil domain containing 30                                 |
| TRPV6    | -0.86561 | 0.000491 | 0.003074 | -3.48574 | Down | transient receptor potential cation channel subfamily V member 6 |
| SLC4A11  | -0.86245 | 0.000692 | 0.004017 | -3.39255 | Down | solute carrier family 4 member 11                                |
| LCA5L    | -0.86201 | 0.000185 | 0.001427 | -3.73905 | Down | lebercilin LCA5 like                                             |
| ALDH3A1  | -0.8602  | 0.009274 | 0.030957 | -2.60179 | Down | aldehyde dehydrogenase 3 family member A1                        |
| CLDN10   | -0.85879 | 0.000336 | 0.002304 | -3.58549 | Down | claudin 10                                                       |
| BAAT     | -0.8557  | 0.0037   | 0.015053 | -2.90265 | Down | bile acid-CoA:amino acid N-acyltransferase                       |
| SPTBN2   | -0.85483 | 2.32E-05 | 0.00027  | -4.23181 | Down | spectrin beta, non-erythrocytic 2                                |
| VSTM2L   | -0.85454 | 9.70E-05 | 0.000869 | -3.89794 | Down | V-set and transmembrane domain containing 2 like                 |
| SALL4    | -0.8545  | 0.000271 | 0.001934 | -3.64191 | Down | spalt like transcription factor 4                                |
| SLC22A4  | -0.85099 | 0.000367 | 0.002457 | -3.563   | Down | solute carrier family 22 member 4                                |
| SYT12    | -0.84986 | 0.004634 | 0.017964 | -2.83145 | Down | synaptotagmin 12                                                 |
| PPP1R32  | -0.84947 | 1.59E-05 | 0.000201 | -4.31571 | Down | protein phosphatase 1 regulatory subunit 32                      |
| SERPINE1 | -0.84896 | 0.004492 | 0.017481 | -2.84138 | Down | serpin family E member 1                                         |
| COL28A1  | -0.84895 | 0.000491 | 0.003074 | -3.48587 | Down | collagen type XXVIII alpha 1 chain                               |
| BCO2     | -0.84871 | 3.90E-07 | 9.83E-06 | -5.0737  | Down | beta-carotene oxygenase 2                                        |

|         |          |          |          |          |      |                                                                         |
|---------|----------|----------|----------|----------|------|-------------------------------------------------------------------------|
| SLC51A  | -0.84745 | 0.009252 | 0.030913 | -2.60258 | Down | solute carrier family 51 subunit alpha                                  |
| OGDHL   | -0.84526 | 0.015315 | 0.046478 | -2.42485 | Down | oxoglutarate dehydrogenase L                                            |
| CES4A   | -0.84525 | 6.81E-07 | 1.57E-05 | -4.96684 | Down | carboxylesterase 4A                                                     |
| COMP    | -0.84509 | 0.003913 | 0.01571  | -2.88512 | Down | cartilage oligomeric matrix protein                                     |
| SPATA18 | -0.84457 | 0.001466 | 0.00731  | -3.18131 | Down | spermatogenesis associated 18                                           |
| DPP10   | -0.84416 | 0.001498 | 0.007431 | -3.17507 | Down | dipeptidyl peptidase like 10                                            |
| BBOF1   | -0.84411 | 7.73E-05 | 0.000725 | -3.95251 | Down | basal body orientation factor 1                                         |
| DZIP1L  | -0.84411 | 4.78E-08 | 1.73E-06 | -5.45922 | Down | DAZ interacting zinc finger protein 1 like                              |
| H2BC8   | -0.84364 | 0.000157 | 0.001263 | -3.78039 | Down | H2B clustered histone 8                                                 |
| OSCP1   | -0.84193 | 2.00E-05 | 0.00024  | -4.2646  | Down | organic solute carrier partner 1                                        |
| CCDC180 | -0.84176 | 2.18E-05 | 0.000257 | -4.2453  | Down | coiled-coil domain containing 180                                       |
| TTC34   | -0.84166 | 1.88E-05 | 0.000229 | -4.27831 | Down | tetratricopeptide repeat domain 34                                      |
| MLIP    | -0.84099 | 0.005087 | 0.019349 | -2.80145 | Down | muscular LMNA interacting protein                                       |
| CLCNKA  | -0.84099 | 2.63E-05 | 0.000298 | -4.20358 | Down | chloride voltage-gated channel Ka                                       |
| HCN4    | -0.84094 | 0.009377 | 0.031218 | -2.598   | Down | hyperpolarization activated cyclic nucleotide gated potassium channel 4 |
| TRIM17  | -0.83855 | 1.51E-06 | 3.10E-05 | -4.80963 | Down | tripartite motif containing 17                                          |
| H2AC8   | -0.83851 | 0.000477 | 0.003008 | -3.49307 | Down | H2A clustered histone 8                                                 |
| SMIM5   | -0.83732 | 3.61E-05 | 0.00039  | -4.13116 | Down | small integral membrane protein 5                                       |
| ZMYND12 | -0.83364 | 9.52E-05 | 0.000858 | -3.9025  | Down | zinc finger MYND-type containing 12                                     |
| LCNL1   | -0.83337 | 9.16E-06 | 0.00013  | -4.43599 | Down | lipocalin like 1                                                        |

**Table S2** The enriched GO terms of the up and down regulated differentially expressed genes.

| GO ID              | CATEGORY | GO Name              | adjusted_p value | negative_log10_of_adjusted_p value | Gene Count | Gene                                                                                                                                                                                                                                                                                                                                                                                                                                                                                                                                                                                                                                                                                                                                                                      |
|--------------------|----------|----------------------|------------------|------------------------------------|------------|---------------------------------------------------------------------------------------------------------------------------------------------------------------------------------------------------------------------------------------------------------------------------------------------------------------------------------------------------------------------------------------------------------------------------------------------------------------------------------------------------------------------------------------------------------------------------------------------------------------------------------------------------------------------------------------------------------------------------------------------------------------------------|
| Up regulated genes |          |                      |                  |                                    |            |                                                                                                                                                                                                                                                                                                                                                                                                                                                                                                                                                                                                                                                                                                                                                                           |
| GO:0050896         | BP       | response to stimulus | 5.27E-18         | 17.27803883                        | 288        | OLFM4,DEFA4,RTKN2,CYP1A1,HIP,AGTR2,MAP3K15,ORM2,PRTN3,WFDC12,DEFA3,RNASE3,SCN1A,PI3,CX3CR1,S100A12,TUBB1,PROK2,CSF2,CD177,ANKRD1,AGRP,SLC39A8,ADRA1A,MS4A3,MS4A15,ADCY8,TRIM58,FGG,AGER,LHX9,PF4,FFAR2,ORM1,GP1BA,MPO,CD5L,SH3GL2,ADGRE1,HMGC S2,RXFP1,ITGA2B,F11,S100A8,CHRM1,PGLYRP1,BRINP1,GPM6A,GR1A1,NPR3,VEGFD,CHRM2,MPIG6B,CXCL11,LAMP3,GPR15,SHISA2,KCTD16,IL1A,LILRA1,ND6,CBS,CLDN18,WNT7A,NPFFR1,NFE2BPI,BTNL8,SSTR1,PRKG2,AQP4,USP44,SCD,LRP2,TRIM71,SLC6A4,ME,BDNF,ZNF385B,NRGN,GCOM1,CXCL10,ODAM,CPB2,ANGPTL7,CASP5,CCL8,PRODH,CLTRN,TMEM100,P2RY1,RNASE2,CSPG5,LRN4,VEPH1,FCGR3B,S100A9,NPY1R,MARCKS,IL1B,CXCR1,PLPPR1,CXCR2,GPIHBP1,AFF3,TNNT1,WNT3A,SP5,APOH,FZD5,CHRM3,CTNND2,BMI1,PCARE,CYP1B1,FCN3,TTN,NIM1K,SHISA3,AZGP1,GPAM,STC1,ABCA3,GBP4,CD36,ED |

|            |    |                       |          |             |     |                                                                                                                                                                                                                                                                                                                                                                                                                                                                                                                                                                                                                                                                                                                                                                                                                                                                                                                                                                                                                                          |
|------------|----|-----------------------|----------|-------------|-----|------------------------------------------------------------------------------------------------------------------------------------------------------------------------------------------------------------------------------------------------------------------------------------------------------------------------------------------------------------------------------------------------------------------------------------------------------------------------------------------------------------------------------------------------------------------------------------------------------------------------------------------------------------------------------------------------------------------------------------------------------------------------------------------------------------------------------------------------------------------------------------------------------------------------------------------------------------------------------------------------------------------------------------------|
|            |    |                       |          |             |     | <p>NRB,MYZAP,MACROD2,PLA2G3,BTNL9,CEBPA,TRIB3,GPR18,SLC46A2,CNTN6,FMO5,TNNC1,ANGPT4,SPX,MAP3K21,SYNPO2L,CCDC141,PCSK9,ACVR1C,SH2D1B,PRTG,P2RY13,CDKL2,KITLG,GPD1,CDH13,BATF2,FFAR4,PTPRQ,FIBIN,GPX3,RAPGEF6,LTB,LILRA2,FGF2,ACKR4,CSF3R,MMP25,NDUFC2,MAP1LC3C,FUT7,FASN,PIK3AP1,NKD1,KBTD7,GPR160,FOXD1,SLC1A1,RXRG,LILRA5,SHH,DGAT2,DACH1,PNPLA3,FGF9,HMSD,SLC7A11,CLIC5,SGPP1,MGAT3,CCDC68,MTARC1,OLFML2A,HSPA6,TSPAN12,SCAI,VIP,IGSF6,GMFB,PLLP,SH3GL3,KLRF1,KCNJ2,TRHDE,ADGRE3,KL,UBE2D1,SMAD6,BMPR2,APOA1,CALCRL,TGFBR3,INSIG1,RASGRF1,LRRK2,ATP8A2,CD244,TLR3,CAV2,HLX,CLEC4D,KCNMB4,NLRP12,ADRB1,OCN,TNFSF10,SPOCK2,SLC22A3,CA2,GCSAML,TMEM170B,PAPSS2,EMP2,SNX10,LIFR,HPN,MNDA,TLR8,CMPK2,GATA3,RNASE4,RSPO2,CCR2,IFIT3,NEK7,EPB41L5,DIPK2A,MARCHF1,CD274,SPRING1,DDIAS,GUCY1A2,TLR7,MFSD2A,RALADCC,CCRL2,PRAM1,BEX1,BMPER,ARHGAP29,DUSP26,ACP3,EFNB2,CCBE1,FZD8,CAV1,UBE2W,ARRB1,TRPC3,CR1,WWC2,GPR82,PEG10,ANOS1,PPP3R1,DLL4,MEFV,TMC2,ANXA3,TFPI,MAPT,ASGR2,CXADR,EPAS1,ADGRG2,TBX3,FADS1,DKK2,DNAJB14,GPER1,SUCNR1,PCLAF</p> |
| GO:0065007 | BP | biological regulation | 3.86E-09 | 8.413646903 | 334 | <p>OLFM4,NECAB1,RTKN2,CYP1A1,HHIP,AGTR2,MAP3K15,ORM2,PRTN3,WFDC12,DEFA3,SCN1A,HSD17B6,PI3,CX3CR1,S100A12,TUBB1,PROK2,CSF2,CD177,ANKRD1,AGRP,SLC39A8,ADRA1A,MS4A3,MS4A15,ADCY8,TRIM58,FGG,AGER,LHX9,PF4,FFAR2,ORM1,GP1BA,MPO,CD5L,SH3GL2,ADGRE1,RXFP1,ITGA2B,F11,S100A8,CHRM1,PGLYRP1,BRINP1,ZBED2,GPM6A,GR1A1,NPR3,VEGFD,CHRM2,MPIG6B,CXCL11,LAMP3,GPR15,SHISA2,KCTD16,IL1A,LILRA1,CBS,CLDN18,WNT7A,NPFFR1,NFE2,BPI,BTNL8,SSTR1,PRKG2,AQP4,USP44,PLA2G4E,SCD,LRP2,TRIM71,SLC6A4,MME,BDNF,ZNF385B,MYRF,NRGN,GCOM1,GFI1B,LRRN3,CXCL10,ODAM,CPB2,RPH3A,KCNS1,ANGPTL7,TMEM97,PTCRA,CASP5,LGI3,CCL8,PRODH,CLTRN,TMEM100,P2RY1,CSPG5,LRRTM2,VEPH1,FCGR3B,S100A9,NPY1R,IL1B,CXCR1,PLPPR1,CXCR2,GPIHBP1,AFF3,TNNT1,WNT3A,PARD6B,SP5,APOH,FZD5,CHRM3,ACADL,CTNND2,BMI1,CYP1B1,FCN3,TTN,NIM1K,SHISA3,AZGP1,RIPPLY3,GPAM,STC1,ABCA3,ELOVL3,CD36,CACNA2D3,CACNA2D2,EDNRB,MYZAP,PLA2G3,BTNL9,CEBPA,T</p>                                                                                                                                              |



GO:0071944

CC

cell  
periphery

2.59E-27

26.58672363

245

RIB3,GPR18,SLC46A2,CNTN6,FM  
O5,TNNC1,ANGPT4,SPX,MAP3K2  
1,SYNPO2L,ATP8A1,PCSK9,ACVR  
1C,TDRD9,RNF128,SH2D1B,PRTG  
,P2RY13,IER3IP1,CDKL2,KITLG,G  
PD1,CDH13,BATF2,DPP6,FFAR4,F  
IBIN,RAPGEF6,LTB,LILRA2,FGF2  
,ACKR4,CSF3R,NDUFC2,TSPAN13  
,P3H2,FUT7,PLAG1,UPK3B,PIK3A  
P1,NKD1,ADH1B,STXBP6,KBTBD  
7,GPR160,FOXD1,SLC1A1,RXRG,  
LILRA5,SHH,DGAT2,DACH1,SRP  
9,FGF9,HMSD,SLC7A11,CLIC5,SG  
PP1,MGAT3,CCDC68,OLFML2A,P  
HGDH,TSPAN12,SCA1,KCNA4,HO  
XD1,PCDH17,VIP,IGSF6,GMFB,SC  
OC,SH3GL3,SDR16C5,KLRF1,KCN  
J2,TRHDE,ADGRE3,KL,UBE2D1,A  
DH1A,SMAD6,ELF5,KHDRBS2,B  
MPR2,APOA1,QKI,NEGR1,CALCR  
L,TGFBR3,INSIG1,RASGRF1,LRR  
K2,ATP8A2,CD244,TLR3,CAV2,H  
LX,CLEC4D,KCNMB4,NLRP12,AD  
RB1,OCLN,TNFSF10,SPOCK2,SUS  
D2,SLC22A3,SPIN4,CA2,GCSAML,  
TMEM170B,PAPSS2,EMP2,GPM6B  
,LIFR,PHACTR1,HPN,RIMS4,MND  
A,TLR8,GTFA2A1,GATA3,DCXR,RS  
PO2,CCR2,IFIT3,NEK7,TMEM41B,  
NKAPL,EPB41L5,DIPK2A,VGLL3,  
CD274,SPRING1,DDIAS,STARD4,  
GUCY1A2,CHPT1,TLR7,MFSD2A,  
RALA,DCC,CCRL2,PRAM1,BEX1,  
BMPER,ARHGAP29,PDP2,DUSP26  
,KANK4,ACP3,EFNB2,CCBE1,ZBT  
B41,PKIA,HSD17B12,FZD8,CAV1,  
DHCR7,SP6,ANP32E,ID4,ARRB1,T  
RPC3,CR1,WWC2,GPR82,ZBTB6,H  
ECW2,PEG10,ANOS1,PPP3R1,DLL  
4,CFL2,MEFV,TMC2,ANXA3,TFPI,  
MAPT,ASGR2,EDIL3,C21ORF91,S  
LITRK2,CXADR,IRX1,EPAS1,ADG  
RG2,RNF144B,TBX3,IRX2,FADS1,  
DDK2,GPER1,SUCNR1,PCLAF  
SLCO1A2,OLFM4,RTKN2,HHIP,A  
GTR2,ORM2,PRTN3,SCN1A,PI3,C  
X3CR1,S100A12,CSF2,ALPP,CD17  
7,CADM2,SLC39A8,ADRA1A,MS4  
A3,MS4A15,ADCY8,FGG,AGER,P  
F4,FFAR2,ORM1,GP1BA,CD5L,SL  
CO4C1,SH3GL2,ADGRE1,SLC5A9,  
RXFP1,ITGA2B,F11,S100A8,CHR  
M1,GPM6A,GRIA1,NPR3,MUCL3,  
CHRM2,MPIG6B,LAMP3,GPR15,K  
CTD16,IL1A,LILRA1,CLDN18,WN  
T7A,NPFFR1,BTNL8,SSTR1,PRKG  
2,AQP4,PLA2G4E,FOLR3,SLC19A  
3,LRP2,SLC6A4,MME,NRGN,GFII  
B,LRRN3,CXCL10,ODAM,RPH3A,  
KCNS1,ANGPTL7,TMEM97,CLTR  
N,TMEM100,P2RY1,CSPG5,LRRT  
M2,GPRIN2,LRRN4,VEPH1,SIGLE  
C11,FCGR3B,S100A9,NPY1R,MAR  
CKS,MSMO1,CXCR1,PLPPR1,CXC  
R2,GPIHBP1,PCDH9,WNT3A,PAR  
D6B,CA4,APOH,SGCG,FZD5,CHR  
M3,CTNND2,PRSS21,FCN3,TTN,A  
ZGP1,GPAM,STC1,ABCA3,GBP4,C  
D36,CACNA2D3,CACNA2D2,VSIG  
10,EDNRB,MYZAP,MGAM,PLA2G

|            |    |              |          |             |     |                                                                                                                                                                                                                                                                                                                                                                                                                                                                                                                                                                                                                                                                                                                                                                                                                                                                                                                                                                                                                                                                                                                                                                                                                                                                                                                                                                                                                                                                                                                                                                                                                                                                                                                                                                                                                                                                                                                                                                                                                                                                                                                                                                                    |
|------------|----|--------------|----------|-------------|-----|------------------------------------------------------------------------------------------------------------------------------------------------------------------------------------------------------------------------------------------------------------------------------------------------------------------------------------------------------------------------------------------------------------------------------------------------------------------------------------------------------------------------------------------------------------------------------------------------------------------------------------------------------------------------------------------------------------------------------------------------------------------------------------------------------------------------------------------------------------------------------------------------------------------------------------------------------------------------------------------------------------------------------------------------------------------------------------------------------------------------------------------------------------------------------------------------------------------------------------------------------------------------------------------------------------------------------------------------------------------------------------------------------------------------------------------------------------------------------------------------------------------------------------------------------------------------------------------------------------------------------------------------------------------------------------------------------------------------------------------------------------------------------------------------------------------------------------------------------------------------------------------------------------------------------------------------------------------------------------------------------------------------------------------------------------------------------------------------------------------------------------------------------------------------------------|
|            |    |              |          |             |     | 3,BTNL9,C2ORF88,TRIB3,GPR18,S<br>LC46A2,CNTN6,ANGPT4,ATP8A1,<br>CCDC141,PCSK9,ACVR1C,PRTG,P<br>2RY13,KITLG,CDH13,DPP6,FFAR<br>4,PTPRQ,RAPGEF6,LTB,LILRA2,P<br>DZD2,ACKR4,CSF3R,MMP25,NDU<br>FC2,SLC26A8,TSPAN13,P3H2,FAS<br>N,UPK3B,PIK3AP1,NKD1,ADH1B,<br>STXBP6,GPR160,SLC1A1,LILRA5,<br>SHH,SLC7A11,EFR3B,CLIC5,SGPP<br>1,OLFML2A,HSPA6,TSPAN12,KC<br>NA4,PI4K2B,PCDH17,IGSF6,SDR1<br>6C5,KLRF1,KCNJ2,TRHDE,ADGR<br>E3,KL,ADH1A,BMPR2,GCA,APOA<br>1,NEGR1,CALCRL,TGFBR3,RASG<br>RF1,LRRK2,ATP8A2,CD244,TLR3,<br>CAV2,CLEC4D,KCNMB4,ADRB1,<br>OCLN,VNN2,TNFSF10,SPOCK2,S<br>USD2,SLC22A3,CA2,TMEM170B,E<br>MP2,GPM6B,LIFR,HPN,RIMS4,TL<br>R8,DCXR,CCR2,EPB41L5,AP1S2,<br>MARCF1,CD274,TLR7,MFSD2A,<br>RALA,DCC,CCRL2,PRAM1,TMEM<br>47,SIGLEC14,MAL2,BMPER,SCA<br>MP1,ACP3,EFNB2,CCBE1,HSD17B<br>12,FZD8,CAV1,FREM2,ARRB1,CL<br>CN4,TRPC3,CR1,GPR82,ERVMER<br>34-<br>1,ANOS1,PPP3R1,DLL4,TMC2,AN<br>XA3,TFPI,MAPT,ASGR2,SLC33A1,<br>EDIL3,MATN3,SLITRK2,CXADR,<br>ADGRG2,PHACTR2,GPER1,SUCN<br>R1<br>SLCO1A2,OLFM4,RTKN2,CYP1A1<br>,HHIP,AGTR2,PRTN3,GALNT13,S<br>CN1A,HSD17B6,PI3,CX3CR1,S100<br>A12,CSF2,ALPP,CD177,CADM2,SL<br>C39A8,ADRA1A,MS4A3,MS4A15,<br>ADCY8,FGG,ZDHHC19,AGER,FF<br>AR2,SERTM1,MGAM2,GP1BA,CD<br>5L,SLCO4C1,SH3GL2,ADGRE1,SL<br>C5A9,RXFP1,ITGA2B,F11,S100A8,<br>SFTPA2,CHRM1,SNX22,GPM6A,G<br>RIA1,NPR3,MUCL3,VEGFD,CHR<br>M2,MPIG6B,LAMP3,GPR15,SHISA<br>2,KCTD16,KLRG2,IL1A,LILRA1,N<br>D6,CLDN18,WNT7A,NPFFR1,SFTP<br>A1,BPL,BTNL8,SSTR1,PRKG2,AQP<br>4,PLA2G4E,FOLR3,SCD,SLC19A3,<br>LRP2,SLC6A4,MME,RNF182,MYR<br>F,NRGN,GFI1B,PEBP4,LRRN3,CX<br>CL10,RPH3A,KCNS1,TMEM97,PT<br>CRA,PRODH,CLTRN,TMEM100,P2<br>RY1,CSPG5,LRRTM2,GPRIN2,LRR<br>N4,VEPH1,SIGLEC11,FCGR3B,S10<br>0A9,NPY1R,MARCKS,MSMO1,CX<br>CR1,PLPPR1,CXCR2,GPIHBP1,SA<br>MD5,PCDH9,WNT3A,PARD6B,TM<br>ED7,CA4,SGCG,FZD5,CHRM3,AC<br>ADL,CTNND2,PRSS21,CYP1B1,FC<br>N3,TTN,SHISA3,AZGP1,GPAM,ST<br>C1,ABCA3,ST8SIA6,ELOVL3,GBP<br>4,CD36,CACNA2D3,CACNA2D2,V<br>SIG10,EDNRB,MYZAP,MGAM,PL<br>A2G3,BTNL9,C2ORF88,TRIB3,GP<br>R18,SLC46A2,CNTN6,FMO5,ATP8<br>A1,CCDC141,PCSK9,ACVR1C,RN<br>F128,PRTG,P2RY13,IER3IP1,KITL<br>G,CDH13,DPP6,FFAR4,PTPRQ,AA<br>TK,RAPGEF6,TLCD4,LTB,LILRA2 |
| GO:0016020 | CC | membran<br>e | 4.24E-20 | 19.37225431 | 306 |                                                                                                                                                                                                                                                                                                                                                                                                                                                                                                                                                                                                                                                                                                                                                                                                                                                                                                                                                                                                                                                                                                                                                                                                                                                                                                                                                                                                                                                                                                                                                                                                                                                                                                                                                                                                                                                                                                                                                                                                                                                                                                                                                                                    |

|                             |    |                                      |             |             |    |                                                                                                                                                                                                                                                                                                                                                                                                                                                                                                                                                                                                                                                                                                                                                                                                                                                                                                                                                                                                                                                                                                                                                                                                                                                                                                                                                                                                                                                                                                                                                                                                           |
|-----------------------------|----|--------------------------------------|-------------|-------------|----|-----------------------------------------------------------------------------------------------------------------------------------------------------------------------------------------------------------------------------------------------------------------------------------------------------------------------------------------------------------------------------------------------------------------------------------------------------------------------------------------------------------------------------------------------------------------------------------------------------------------------------------------------------------------------------------------------------------------------------------------------------------------------------------------------------------------------------------------------------------------------------------------------------------------------------------------------------------------------------------------------------------------------------------------------------------------------------------------------------------------------------------------------------------------------------------------------------------------------------------------------------------------------------------------------------------------------------------------------------------------------------------------------------------------------------------------------------------------------------------------------------------------------------------------------------------------------------------------------------------|
|                             |    |                                      |             |             |    | ,PDZD2,ACKR4,CSF3R,MMP25,N<br>DUFC2,MAP1LC3C,SLC26A8,TSP<br>AN13,FUT7,FASN,UPK3B,PIK3AP<br>1,TMEM26,NKD1,ADH1B,STXBP6<br>,GPR160,SLC1A1,LILRA5,SHH,DG<br>AT2,PNPLA3,SRP9,SLC7A11,EFR3<br>B,CLIC5,SGPP1,MGAT3,MTARC1,<br>HSPA6,TSPAN12,SCAI,KCNA4,PI4<br>K2B,PCDH17,IGSF6,PLLP,SCOC,S<br>H3GL3,SDR16C5,KLRF1,KCNJ2,T<br>RHDE,LRR25,ADGRE3,KL,ADH1<br>A,ANKRD29,BMPR2,GCA,APOA1,<br>NEGR1,CALCRL,TGFBR3,INSIG1,<br>RASGRF1,LRRK2,FAM241A,ATP8<br>A2,CD244,TLR3,CAV2,CLEC4D,K<br>CNMB4,ADRB1,OCLN,VNN2,TNF<br>SF10,SUSD2,SLC22A3,CA2,TMEM<br>170B,ST6GALNAC5,EMP2,GPM6B<br>,C10ORF105,SNX10,LIFR,HPN,RI<br>MS4,LILRB1,TLR8,DCXR,CCR2,T<br>MEM41B,EPB41L5,AP1S2,DIPK2A<br>,MARCHF1,CD274,SPRING1,B3GA<br>LT2,CHPT1,TLR7,MFSD2A,RALA,<br>DCC,CCRL2,PRAM1,TMEM47,SIG<br>LEC14,MAL2,SCAMP1,TMEM139,<br>SMCO3,ACP3,EFNB2,HPCAL1,HS<br>D17B12,FZD8,CAV1,DHCR7,CAS<br>D1,UBE2W,FREM2,SLC25A46,SC5<br>D,ARRB1,CLCN4,TRPC3,CR1,B3G<br>ALNT1,GPR82,ERVMER34-<br>1,PEG10,ANOS1,PPP3R1,DLL4,TM<br>C2,ANXA3,TFPI,MYLK4,MAPT,C1<br>GALT1,ASGR2,C19ORF38,SLC33A<br>1,EBP,SLITRK2,CXADR,ADGRG2,<br>RNF144B,FADS1,DNAJB14,PHAC<br>TR2,PXMP4,GPER1,SUCNR1<br>AGTR2,PRTN3,CX3CR1,S100A12,<br>PROK2,CSF2,CD177,AGRP,FGG,P<br>F4,ITGA2B,S100A8,VEGFD,CXCL<br>11,IL1A,WNT7A,BTNL8,BDNF,CX<br>CL10,ANGPTL7,CCL8,P2RY1,CSP<br>G5,LRR22,S100A9,IL1B,WNT3A<br>,STC1,CD36,EDNRB,BTNL9,ANGP<br>T4,SPX,PCSK9,KITLG,LTB,FGF2,P<br>IK3AP1,SHH,FGF9,VIP,GMFB,KL,<br>SMAD6,APOA1,TGFBR3,RASGRF<br>1,CD244,CLEC4D,ADRB1,TNFSF1<br>0,EMP2,LIFR,GATA3,RSP02,CCR2<br>,MARCHF1,RALA,CCRL2,BEX1,E<br>FNB2,FZD8,CAV1,ARRB1,DLL4,E<br>DIL3,CXADR,DKK2 |
| GO:0005102                  | MF | signaling<br>receptor<br>binding     | 0.000101538 | 3.993371364 | 68 | AGTR2,CX3CR1,ADRA1A,AGER,F<br>FAR2,GPIBA,ADGRE1,RXFP1,CH<br>RM1,PGLYRP1,GRIA1,NPR3,CHR<br>M2,GPR15,LILRA1,NPFFR1,SSTR1<br>,FOLR3,P2RY1,FCGR3B,NPY1R,C<br>XCR1,CXCR2,FZD5,CHRM3,CD36,<br>EDNRB,GPR18,ACVR1C,PRTG,P2<br>RY13,FFAR4,LILRA2,ACKR4,CSF<br>3R,GPR160,RXRG,LILRA5,IGSF6,<br>KLRF1,ADGRE3,BMPR2,CALCRL,<br>TGFBR3,CD244,TLR3,CLEC4D,AD<br>RB1,LIFR,TLR8,CCR2,TLR7,DCC,<br>CCRL2,FZD8,CR1,GPR82,ADGRG<br>2,GPER1,SUCNR1                                                                                                                                                                                                                                                                                                                                                                                                                                                                                                                                                                                                                                                                                                                                                                                                                                                                                                                                                                                                                                                                                                                                                                            |
| GO:0060089                  | MF | molecular<br>transduce<br>r activity | 0.001447579 | 2.839357788 | 60 | AGTR2,CX3CR1,ADRA1A,AGER,F<br>FAR2,GPIBA,ADGRE1,RXFP1,CH<br>RM1,PGLYRP1,GRIA1,NPR3,CHR<br>M2,GPR15,LILRA1,NPFFR1,SSTR1<br>,FOLR3,P2RY1,FCGR3B,NPY1R,C<br>XCR1,CXCR2,FZD5,CHRM3,CD36,<br>EDNRB,GPR18,ACVR1C,PRTG,P2<br>RY13,FFAR4,LILRA2,ACKR4,CSF<br>3R,GPR160,RXRG,LILRA5,IGSF6,<br>KLRF1,ADGRE3,BMPR2,CALCRL,<br>TGFBR3,CD244,TLR3,CLEC4D,AD<br>RB1,LIFR,TLR8,CCR2,TLR7,DCC,<br>CCRL2,FZD8,CR1,GPR82,ADGRG<br>2,GPER1,SUCNR1                                                                                                                                                                                                                                                                                                                                                                                                                                                                                                                                                                                                                                                                                                                                                                                                                                                                                                                                                                                                                                                                                                                                                                            |
| <b>Down regulated genes</b> |    |                                      |             |             |    |                                                                                                                                                                                                                                                                                                                                                                                                                                                                                                                                                                                                                                                                                                                                                                                                                                                                                                                                                                                                                                                                                                                                                                                                                                                                                                                                                                                                                                                                                                                                                                                                           |
| GO:0007017                  | BP | microtubule<br>-based<br>process     | 5.51E-46    | 45.2586316  | 98 | MCIDAS,DEUP1,DRC1,DNAAF1,D<br>NAI1,DNAH3,DNAH10,CFAP100,C<br>FAP157,CFAP52,HOATZ,DNAH9,<br>HYDIN,CFAP74,TEKT2,TEKT1,CF                                                                                                                                                                                                                                                                                                                                                                                                                                                                                                                                                                                                                                                                                                                                                                                                                                                                                                                                                                                                                                                                                                                                                                                                                                                                                                                                                                                                                                                                                    |

|            |    |                                                      |          |             |     |                                                                                                                                                                                                                                                                                                                                                                                                                                                                                                                                                                                                                                                                                                                                                 |
|------------|----|------------------------------------------------------|----------|-------------|-----|-------------------------------------------------------------------------------------------------------------------------------------------------------------------------------------------------------------------------------------------------------------------------------------------------------------------------------------------------------------------------------------------------------------------------------------------------------------------------------------------------------------------------------------------------------------------------------------------------------------------------------------------------------------------------------------------------------------------------------------------------|
|            |    |                                                      |          |             |     | AP46,CFAP65,SPAG17,DNAJB13,CFAP53,DNAH12,CCDC65,ODAD1,TTLL9,DNAH11,CFAP43,SPAG6,RSPH1,CFAP47,SPEF1,DRC7,DNAH2,RP1,DNAAF6,DNAI3,GAS2L2,TTTC29,DNAI2,CCDC187,EFHC2,TEKT4,STMND1,ZBBX,NEK10,DNAAF8,DNAH7,CFAP45,AGBL4,CFAP70,DNAH6,CCDC78,CFAP61,ANKFN1,ZMYND10,ODAD2,TCTE1,CFAP251,ENO4,ODAD3,MAPK15,RSPH4A,DYNLT4,CATSPERD,DNAAF3,ENKUR,TOGARAM2,ROPN1L,CLXN,ODAD4,DYNLRB2,DAW1,RSPH9,MEIG1,CFAP58,CFAP73,TEKT3,KIF19,CCDC40,DNAH5,FOXJ1,DNAI4,CCDC170,PIERCE1,CFAP54,MNS1,MAP7D2,LRGUK,TTLL6,KIF6,KIF24,IQCG,TPPP3,NME5,DNAAF11,MAK,TTC21A,LCA5L                                                                                                                                                                                                |
| GO:0120036 | BP | plasma membrane bounded cell projection organization | 6.93E-25 | 24.15903131 | 93  | MCIDAS,CCNO,DRC1,DNAAF1,DNAI1,CFAP100,CFAP157,CFAP52,HOATZ,HYDIN,CFAP74,TEKT2,TEKT1,CFAP46,CFAP65,SPAG17,DNAJB13,CFAP53,CCDC65,ODAD1,CFAP43,SPAG6,RSPH1,CFAP47,SPEF1,DRC7,DNAH2,RP1,CIBAR2,DNAAF6,DNAI3,TTTC29,DNAI2,EFHC2,TEKT4,STMND1,DNAAF8,DNAH7,CFAP70,UBXN10,EDN2,CFAP61,CFAP126,ZMYND10,ODAD2,ENO4,ODAD3,MAPK15,RSPH4A,PIFO,DNAAF3,CLXN,ODAD4,DAW1,RSPH9,CATIP,MEIG1,CFAP58,CFAP73,TEKT3,CCDC113,IQUB,KIF19,DKK1,CCDC40,DNAH5,FOXJ1,DNAI4,RCIN1,PIERCE1,CFAP54,ESPN,NGEF,MNS1,LRGUK,KIF24,IQCG,CFAP161,TMEM231,NME5,GRM7,CRABP2,DNAAF11,OMG,KIAA0319,MAK,CCDC96,EFNB3,TTTC21A,LCA5L,VSTM2L,BBOF1,DZIP1L                                                                                                                                  |
| GO:0042995 | CC | cell projection                                      | 3.00E-45 | 44.52237057 | 154 | DRC1,DNAAF1,DNAI1,DNAH3,DNAH10,CFAP100,CFAP157,CFAP52,HOATZ,NME9,DRD5,DNAH9,HYDIN,DRC3,CFAP74,AKAP14,TEKT2,TEKT1,CFAP46,CFAP65,SPAG17,DNAJB13,STOML3,CFAP53,DNAH12,CCDC65,ODAD1,TTLL9,CFAP107,DNAH11,CFAP43,AGBL2,DLEC1,ADGB,BDKRB1,SPAG6,RSPH1,GABRP,CFAP47,SPEF1,SPATA4,DRC7,DNAH2,RP1,CIBAR2,DNAI3,RIBC2,GAS2L2,TTTC29,DNAI2,EFHC2,TEKT4,STMND1,FAM166B,ZBBX,CNGA4,CFAP141,DNAH7,CFAP45,SPAG8,AGBL4,CFAP70,DNAH6,UBXN10,CFAP61,CFAP126,DNAI7,ODAD2,TCTE1,CFAP251,SRD5A2,FAM183A,ENO4,ODAD3,MAPK15,RSPH4A,DYNLT4,CATSPERD,FANK1,UCN3,PIFO,C4ORF47,ENKUR,CFAP210,TOGARAM2,ROPN1L,IQCD,C5ORF49,CLXN,ODAD4,DYNLRB2,DAW1,RSPH9,SAXO2,CFAP58,CFAP276,CFAP73,DOC2A,AK8,CFAP77,TEKT3,SYT8,CCDC181,CCDC113,CERKL,IQUB,KIF19,PACRG,CNGA3,CCDC40,SNTN,E |

|            |    |           |          |             |     |                                                                                                                                                                                                                                                                                                                                                                                                                                                                                                                                                                                                                                                                                                                                                                                                                                                                                                                                                                                                                                                                                                                                                                                                                                                                                                                                                                                                                                                                                                                                                                                                                                                                                                                                                                                                                                                                                      |
|------------|----|-----------|----------|-------------|-----|--------------------------------------------------------------------------------------------------------------------------------------------------------------------------------------------------------------------------------------------------------------------------------------------------------------------------------------------------------------------------------------------------------------------------------------------------------------------------------------------------------------------------------------------------------------------------------------------------------------------------------------------------------------------------------------------------------------------------------------------------------------------------------------------------------------------------------------------------------------------------------------------------------------------------------------------------------------------------------------------------------------------------------------------------------------------------------------------------------------------------------------------------------------------------------------------------------------------------------------------------------------------------------------------------------------------------------------------------------------------------------------------------------------------------------------------------------------------------------------------------------------------------------------------------------------------------------------------------------------------------------------------------------------------------------------------------------------------------------------------------------------------------------------------------------------------------------------------------------------------------------------|
|            |    |           |          |             |     | FHB,DNAH5,EFCAB6,DNAI4,CFA<br>P95,CCDC170,SRCIN1,FLACC1,PR<br>OM1,PIERCE1,CFAP54,ESPN,AK7,<br>NGEF,MNS1,LRGUK,OXTR,TLL<br>6,IQCG,CFAP161,ANKK1,TMEM2<br>31,CFAP119,AQP5,NME5,GRM7,S<br>YT13,DNAAF11,SPACA9,CABCO<br>CO1,LRRC56,TSGA10,SLC28A3,M<br>AK,CCDC96,TTC21A,LCA5L,SPTB<br>N2,VSTM2L,PPP1R32,BBOF1,DZIP<br>1L,HCN4                                                                                                                                                                                                                                                                                                                                                                                                                                                                                                                                                                                                                                                                                                                                                                                                                                                                                                                                                                                                                                                                                                                                                                                                                                                                                                                                                                                                                                                                                                                                                            |
| GO:0005737 | CC | cytoplasm | 1.94E-15 | 14.71154083 | 308 | MUC5AC,CYP2A6,SERPINB11,PC<br>K1,BTG4,PITX1,ATP12A,SERPINB<br>3,FRMPD2,CCNO,CYP2F1,KRT14,<br>GSTA2,DEUP1,DRC1,FBXW10,DN<br>AAF1,DNAI1,CFAP299,DNAH3,EP<br>PIN,DNAH10,CFAP100,CFAP157,C<br>RABP1,SEC14L3,MUC13,CFAP52,<br>CYP2A13,HOATZ,NME9,ALOX15,<br>LMNTD1,DNAH9,HYDIN,DRC3,C<br>FAP74,AKAP14,TEKT2,MUC16,TE<br>KT1,CFAP46,CFAP65,SPAG17,DN<br>AJB13,CCNA1,SLC23A1,VWA3B,<br>CAPSL,CCDC33,CFAP53,SLAH3,D<br>NAH12,CCDC65,ODAD1,ABHD12<br>B,TTLL9,CFAP107,DNAH11,EPGN<br>,MB,LRRC43,CFAP43,AGBL2,DLE<br>C1,ACSBG1,MROH9,ABCA13,BD<br>KRB1,SPAG6,RSPH1,MYCBPAP,C<br>FAP47,SPEF1,SPATA4,DRC7,DNA<br>H2,KRT13,LRRC46,RP1,CIBAR2,D<br>NAAF6,DNAI3,NWD1,RIBC2,GAS<br>2L2,TTC29,DNAI2,TTLL10,EFHC2,<br>FABP6,TEKT4,STMND1,FAM166B<br>,FAM83A,CNGA4,CFAP141,DNAA<br>F8,DCDC1,SCGB1A1,DNAH7,CFA<br>P45,USP6,SPAG8,AGBL4,WDR93,<br>CFAP70,DNAH6,CCDC78,UBXN10<br>,GCNT3,CFAP61,CFAP126,ZMYN<br>D10,HHATL,TSPAN1,DNAI7,ODA<br>D2,TSNAXIP1,TCTE1,CWH43,CFA<br>P251,SRD5A2,ENO4,ODAD3,MAP<br>K15,RSPH4A,DYNLT4,CHST9,B3G<br>ALT5,MMP3,FBXO15,FANK1,ERN<br>2,PIFO,C4ORF47,SLC5A5,FUT6,D<br>NAAF3,ENKUR,CFAP210,TOGAR<br>AM2,ROPN1L,IQCD,DIO1,CLXN,<br>ODAD4,DYNLRB2,MAT1A,RSPH9<br>,CATIP,MEIG1,C9ORF24,SPATA17<br>,EYA1,SAXO2,SERPINB2,CFAP58,<br>CFAP276,SPINK1,TP53AIP1,CFAP<br>73,DOC2A,AK8,TEKT3,PADI1,TE<br>X26,ADH6,SYT8,STOX1,CCDC181<br>,CCDC113,B4GALNT2,CERKL,TM<br>EM59L,IQUB,KIF19,DKK1,PACRG<br>,TMPRSS4,GSTA1,CNGA3,TTC23L<br>,CCDC40,ABCA12,CD164L2,CNTD<br>1,TP73,EFHB,DNAH5,EFCAB6,DN<br>AI4,BCAS1,HRK,KRT15,CFAP95,G<br>DA,CCDC170,SRCIN1,FLACC1,CA<br>PN13,PROM1,STK33,ST6GALNAC<br>1,PIERCE1,ATG9B,CFAP54,PLCH2<br>,CCDC146,ESPN,MS4A6E,AK7,TRI<br>M29,SLC27A2,PIH1D2,MUC4,AKR<br>1B10,NGEF,MNS1,WNK2,TF3,FU<br>T2,NEK11,GBP6,AWAT2,LGSN,LR<br>GUK,BBOX1,CRLF1,PLPP2,FAM8<br>3B,TTLL6,KIF6,KIF24,KPNA7,IQC<br>G,GJB3,CFAP161,B3GNT3,TPPP3,<br>PPIL6,H2BC26,CP,ANKK1,GSTA3, |

|            |    |                     |             |             |    |                                                                                                                                                                                                                                                                                                                                                                                                                                  |
|------------|----|---------------------|-------------|-------------|----|----------------------------------------------------------------------------------------------------------------------------------------------------------------------------------------------------------------------------------------------------------------------------------------------------------------------------------------------------------------------------------------------------------------------------------|
| GO:0015631 | MF | tubulin binding     | 5.74736E-06 | 5.240531874 | 27 | GLB1L3,CHST6,TMEM184A,PKP2,CFAP119,COL7A1,LHCGR,KCNRG,EPN3,AQP5,HNF4G,GRM7,CYP2J2,RAB3B,BAIAP3,SYT13,CRABP2,LRRC23,DNAAF11,KLK13,SPACA9,CABCOCO1,DEGS2,KIAA0319,CCDC81,CAPS,ELF3,RAB36,TSGA10,ZDHHC11,ARHGAP39,KLK14,SRGAP3,CDH3,SLC28A3,MAK,WNK4,RGS22,CCDC96,SCG5,CYP27C1,LCA5L,ALDH3A1,CLDN10,BAA T,SPTBN2,VSTM2L,SALL4,SLC22A4,SYT12,PPP1R32,SERPINE1,COL28A1,BCO2,SLC51A,OGDHL,SPATA18,BBOF1,DZIP1L,H2BC8,OSCP1,HCN4,TRIM17 |
| GO:0005509 | MF | calcium ion binding | 0.147835087 | 0.830222478 | 26 | CFAP157,TTL9,DLEC1,SPAG6,SP EF1,SPATA4,RP1,GAS2L2,CCDC187,EFHC2,STMND1,DCDC1,SPAG8,AGBL4,DNAI7,PIFO,TOGARAM2,C9ORF24,SAXO2,CCDC181,KIF19,PACRG,CCDC170,TTL6,KIF6,KIF24,TPPP3                                                                                                                                                                                                                                                     |
|            |    |                     |             |             |    | CDHR4,CAPSL,EFCAB12,EFHC2,CDHR3,DNAH7,WDR49,CLXN,DOC2A,PADI1,SYT8,HABP2,EFCAB10,SNTN,EFHB,EFCAB6,CAPN13,PLCH2,GRM7,BAIAP3,SYT13,CABCOCO1,CAPS,CDH3,SYT12,COMP                                                                                                                                                                                                                                                                    |

**Table S3** The enriched pathway terms of the up and down regulated differentially expressed genes.

| Pathway ID                | Pathway Name                         | adjusted_p_value | negative_log10_of_adjusted_p_value | Gene Count | Gene                                                                                                                                                                                                                                   |
|---------------------------|--------------------------------------|------------------|------------------------------------|------------|----------------------------------------------------------------------------------------------------------------------------------------------------------------------------------------------------------------------------------------|
| <b>Up regulated genes</b> |                                      |                  |                                    |            |                                                                                                                                                                                                                                        |
| REAC:R-HSA-500792         | GPCR ligand binding                  | 6.19E-07         | 6.208233279                        | 38         | AGTR2,CX3CR1,PROK2,ADRA1A,PF4,FFAR2,ADGRE1,RXFP1,CHRM1,CHRM2,CXCL11,WNT7A,NPFFR1,SSTR1,CXCL10,P2RY1,NPY1R,CXCR1,PLP PR1,CXCR2,WNT3A,FZD5,CHRM3,EDNRB,GPR18,P2RY13,FFAR4,ACKR4,SHH,VIP,ADGRE3,CALCRL,ADRB1,CCR2,CCRL2,FZD8,GPER1,SUCNR1 |
| REAC:R-HSA-373076         | Class A/1 (Rhodopsin-like receptors) | 8.95445E-06      | 5.047960873                        | 29         | AGTR2,CX3CR1,PROK2,ADRA1A,PF4,FFAR2,RXFP1,CHRM1,CHRM2,CXCL11,NPFFR1,SSTR1,CXCL10,P2RY1,NPY1R,CXCR1,PLPPR1,CXCR2,CHRM3,EDNRB,GPR18,P2RY13,FFAR4,ACKR4,ADRB1,CCR2,CCRL2,GPER1,SUCNR1                                                     |
| REAC:R-HSA-6798695        | Neutrophil degranulation             | 2.14395E-05      | 4.668784673                        | 35         | OLFM4,DEFA4,ORM2,PRTN3,RNASE3,S100A12,CD177,MS4A3,ORM1,MPO,SLCO4C1,S100A8,PGLYRP1,BPI,FOLR3,MM E,RNASE2,FCGR3B,S100A9,CXCR1,CXCR2,CD36,MGAM,ATP8A1,MMP25,NDUFC2,HSPA6,ADGRE3,GCA,CLEC4D,MNDA,SIGLEC14,SCAMP1,ACP3,CRI                  |

|                             |                                |             |             |    |                                                                                                                                                                                                                                                                                                                                                                                                                                                                                                                                                                             |
|-----------------------------|--------------------------------|-------------|-------------|----|-----------------------------------------------------------------------------------------------------------------------------------------------------------------------------------------------------------------------------------------------------------------------------------------------------------------------------------------------------------------------------------------------------------------------------------------------------------------------------------------------------------------------------------------------------------------------------|
| REAC:R-HSA-168256           | Immune System                  | 0.004963747 | 2.304190341 | 83 | OLFM4,DEFA4,ORM2,PRTN3,DEFA3,RNASE3,PI3,S100A12,TUBB1,CSF2,CD177,MS4A3,FGG,AGER,ORM1,MPO,SLCO4C1,SH3GL2,S100A8,SFTPA2,PGLYR1,IL1A,LILRA1,SFTPA1,BPI,BTNL8,FOLR3,TRIM71,MME,RNF182,CXCL10,CPB2,RNASE2,SIGLEC11,FCGR3B,S100A9,IL1B,CXCR1,CXCR2,FCN3,GBP4,CD36,MGAM,BTNL9,TRIB3,ATP8A1,SH2D1B,LTB,LILRA2,FGF2,CSF3R,MMP25,NDUFC2,PIK3AP1,KBTBD7,LILRA5,HSPA6,KLRF1,ADGRE3,UBE2D1,GCA,TLR3,CLEC4D,LIFR,MNDA,TLR8,GATA3,CCR2,IFIT3,AP1S2,CD274,TLR7,RALA,SIGLEC14,SCAMP1,ACP3,UBE2W,CR1,HECW2,PPP3R1,MEFV,CXADR,RNF144B                                                          |
| REAC:R-HSA-556833           | Metabolism of lipids           | 0.008947205 | 2.048312629 | 37 | SLCO1A2,CYP1A1,ANKRD1,HMGCS2,PLA2G4E,SCD,LRP2,MSMO1,ACADL,CYP1B1,GPAM,ELOVL3,CD36,HMGCS1,PLA2G3,TRIB3,GPD1,FASN,DGAT2,PNPLA3,ACOXL,SGPP1,PI4K2B,APOA1,INSIG1,STARD4,CHPT1,MFSD2A,HSD17B12,CAV1,DHCR7,SC5D,B3GALNT1,ACAT2,EBP,IDI1,FADS1                                                                                                                                                                                                                                                                                                                                     |
| REAC:R-HSA-162582           | Signal Transduction            | 0.034220611 | 1.465712234 | 92 | HHIP,AGTR2,CX3CR1,TUBB1,PROK2,CSF2,ADRA1A,ADCY8,FGG,PF4,FFAR2,SH3GL2,ADGRE1,RXFP1,ITGA2B,S100A8,CHRM1,VEGFD,CHRM2,CXCL11,GPR15,WNT7A,NPFFR1,STR1,PRKG2,SCD,BDNF,CXCL10,PTCRA,P2RY1,S100A9,NPY1R,CXCR1,PLPPR1,CXCR2,WNT3A,PARD6B,FZD5,CHRM3,BMI1,GPAM,EDNRB,TRIB3,GPR18,ACVR1C,P2RY13,FFAR4,FGF2,ACKR4,FASN,PIK3AP1,KBTBD7,RXRG,SHH,FGF9,SCA1,VIP,SH3GL3,SDR16C5,ADGRE3,UBE2D1,ADH1A,SMA D6,KHDRBS2,BMPR2,CALCR L,RASGRF1,LRRK2,CAV2,ADRB1,TNFSF10,HPN,GTF2A1,GATA3,RSPO2,CCR2,CD274,RALA,CCRL2,ARHGAP29,FZD8,CAV1,ID4,ARRB1,TRPC3,ANOS1,PPP3R1,DLL4,EPAS1,DKK2,GPER1,SUCNR1 |
| <b>Down regulated genes</b> |                                |             |             |    |                                                                                                                                                                                                                                                                                                                                                                                                                                                                                                                                                                             |
| REAC:R-HSA-5083625          | Defective GALNT3 causes HFTC   | 0.014807171 | 1.829527921 | 4  | MUC5AC,MUC13,MUC16,MUC4                                                                                                                                                                                                                                                                                                                                                                                                                                                                                                                                                     |
| REAC:R-HSA-9037629          | Lewis blood group biosynthesis | 0.014807171 | 1.829527921 | 4  | B3GALT5,FUT6,B4GALNT2,FUT2                                                                                                                                                                                                                                                                                                                                                                                                                                                                                                                                                  |
| REAC:R-HSA-2672351          | Stimuli-sensing channels       | 0.036572161 | 1.436849376 | 7  | BEST4,STOML3,SLC9C2,WNK2,WNK4,TRPV6,CLCNKA                                                                                                                                                                                                                                                                                                                                                                                                                                                                                                                                  |
| REAC:R-HSA-211859           | Biological oxidations          | 0.0454341   | 1.342618075 | 10 | CYP2A6,CYP2F1,GSTA2,CYP2A13,MAT1A,ADH6,GSTA1,GSTA3,CYP2J2,ALDH3A1                                                                                                                                                                                                                                                                                                                                                                                                                                                                                                           |
| REAC:R-HSA-983712           | Ion channel transport          | 0.13379853  | 0.873548658 | 8  | ATP12A,BEST4,STOML3,SLC9C2,WNK2,WNK4,TRPV6,CLCNKA                                                                                                                                                                                                                                                                                                                                                                                                                                                                                                                           |

REAC:R-HSA-9006931      Signaling by Nuclear Receptors      0.219572305      0.65842244      10      PCK1,CRABP1,EPGN,FABP6, MMP3,TFF3,H2BC26,CRABP2, H2BC8,H2AC8

**Table S4** Topology table for up and down regulated genes

| Regulation | Node     | Degree | Betweenness | Stress   | Closeness |
|------------|----------|--------|-------------|----------|-----------|
| Up         | LRRK2    | 472    | 0.190674    | 1.06E+08 | 0.335042  |
| Up         | BMI1     | 218    | 0.071143    | 53875450 | 0.298069  |
| Up         | EBP      | 206    | 0.071703    | 29140262 | 0.287384  |
| Up         | MNDA     | 171    | 0.047777    | 41765340 | 0.276267  |
| Up         | KBTBD7   | 126    | 0.040553    | 11107264 | 0.280663  |
| Up         | SH3GL3   | 109    | 0.03146     | 7853178  | 0.292344  |
| Up         | FFAR2    | 108    | 0.022616    | 14923842 | 0.250609  |
| Up         | CAV1     | 104    | 0.035343    | 19955290 | 0.285318  |
| Up         | ARRB1    | 101    | 0.029933    | 15649370 | 0.279899  |
| Up         | MAPT     | 92     | 0.025833    | 13875412 | 0.273937  |
| Up         | MME      | 91     | 0.028261    | 18076366 | 0.26538   |
| Up         | NEK7     | 91     | 0.029626    | 6679066  | 0.279028  |
| Up         | TTN      | 84     | 0.023143    | 10691940 | 0.282317  |
| Up         | TRIB3    | 83     | 0.027033    | 8927188  | 0.29651   |
| Up         | TLCD4    | 80     | 0.016566    | 6890526  | 0.263755  |
| Up         | PARD6B   | 71     | 0.026644    | 5780562  | 0.289526  |
| Up         | UBE2W    | 68     | 0.022196    | 6224972  | 0.277814  |
| Up         | HSPA6    | 68     | 0.016356    | 11408814 | 0.264786  |
| Up         | TMEM97   | 67     | 0.019244    | 6783312  | 0.265102  |
| Up         | CHRM3    | 63     | 0.018624    | 7072284  | 0.27258   |
| Up         | LAMP3    | 63     | 0.020745    | 6535078  | 0.271461  |
| Up         | KHDRBS2  | 63     | 0.014929    | 8785332  | 0.254419  |
| Up         | CAV2     | 62     | 0.0132      | 13037948 | 0.257127  |
| Up         | ASGR2    | 61     | 0.012411    | 9569980  | 0.238486  |
| Up         | IFIT3    | 60     | 0.013739    | 5742008  | 0.274574  |
| Up         | VGLL3    | 59     | 0.006261    | 5614482  | 0.251244  |
| Up         | FAM167A  | 57     | 0.014141    | 8093696  | 0.268952  |
| Up         | SLC33A1  | 56     | 0.015855    | 7425746  | 0.271236  |
| Up         | BDNF     | 56     | 0.016474    | 6042434  | 0.270299  |
| Up         | AATK     | 52     | 0.012964    | 9398450  | 0.24777   |
| Up         | TUBB1    | 51     | 0.013668    | 5348290  | 0.261348  |
| Up         | NEBL     | 51     | 0.01065     | 8422544  | 0.276693  |
| Up         | APOA1    | 51     | 0.013963    | 7094756  | 0.257759  |
| Up         | MAP3K21  | 51     | 0.0124      | 8804010  | 0.234549  |
| Up         | PLL      | 49     | 0.018813    | 6150918  | 0.268549  |
| Up         | FASN     | 49     | 0.011236    | 8103754  | 0.25936   |
| Up         | OLFM4    | 49     | 0.011917    | 7462782  | 0.242366  |
| Up         | CYP1A1   | 48     | 0.0126      | 6308186  | 0.249562  |
| Up         | HPCAL1   | 48     | 0.013521    | 7156920  | 0.26466   |
| Up         | EPB41L5  | 48     | 0.012672    | 7586464  | 0.263855  |
| Up         | KLRG2    | 47     | 0.012514    | 3790316  | 0.245363  |
| Up         | UBE2D1   | 47     | 0.009859    | 4929052  | 0.25566   |
| Up         | MAL2     | 47     | 0.009516    | 7300358  | 0.248591  |
| Up         | IER3IP1  | 45     | 0.010479    | 3871278  | 0.248791  |
| Up         | SCD      | 44     | 0.008916    | 4647562  | 0.252236  |
| Up         | VNN2     | 44     | 0.011702    | 5134620  | 0.248468  |
| Up         | SLC25A46 | 44     | 0.008476    | 5268336  | 0.245689  |
| Up         | CCR2     | 41     | 0.010649    | 4340172  | 0.261127  |
| Up         | TMEM139  | 41     | 0.006307    | 4308482  | 0.234124  |
| Up         | SCAMP1   | 40     | 0.008833    | 5807804  | 0.261311  |
| Up         | S100A8   | 38     | 0.006992    | 5069398  | 0.256545  |
| Up         | LRRC25   | 38     | 0.006222    | 3309428  | 0.226148  |
| Up         | SLC1A1   | 37     | 0.010948    | 4480156  | 0.253075  |
| Up         | MS4A3    | 37     | 0.003674    | 3888962  | 0.216608  |
| Up         | ALPP     | 36     | 0.008295    | 2222676  | 0.248368  |
| Up         | EFNB2    | 35     | 0.010959    | 2197494  | 0.265723  |
| Up         | MZT1     | 35     | 0.007766    | 3610258  | 0.235234  |



|    |          |    |          |         |          |
|----|----------|----|----------|---------|----------|
| Up | BTNL8    | 35 | 0.009639 | 1996720 | 0.225817 |
| Up | S100A9   | 34 | 0.005288 | 4106434 | 0.249003 |
| Up | OCLN     | 34 | 0.00856  | 4035020 | 0.255872 |
| Up | HSD17B12 | 33 | 0.006675 | 5796534 | 0.247439 |
| Up | WNT7A    | 32 | 0.008898 | 4194240 | 0.260381 |
| Up | SRP9     | 32 | 0.010153 | 1734654 | 0.281359 |
| Up | TMEM100  | 32 | 0.008166 | 2540638 | 0.253931 |
| Up | CHPT1    | 31 | 0.00693  | 1799108 | 0.243332 |
| Up | SCOC     | 31 | 0.007589 | 2988652 | 0.251984 |
| Up | PRAM1    | 29 | 0.008449 | 3539586 | 0.275145 |
| Up | ANP32E   | 29 | 0.006114 | 3115816 | 0.249843 |
| Up | CD274    | 29 | 0.006097 | 2975198 | 0.220853 |
| Up | PHGDH    | 28 | 0.008161 | 2353820 | 0.275992 |
| Up | ADRA1A   | 28 | 0.004997 | 1951692 | 0.242758 |
| Up | AP1S2    | 28 | 0.007166 | 3086614 | 0.231009 |
| Up | ZMYM1    | 28 | 0.007951 | 2099344 | 0.262757 |
| Up | CDH13    | 27 | 0.005985 | 2659482 | 0.239948 |
| Up | NECAB1   | 27 | 0.004831 | 2711672 | 0.232966 |
| Up | SLC39A8  | 27 | 0.005109 | 2055994 | 0.234252 |
| Up | GATA3    | 26 | 0.003939 | 2670070 | 0.242197 |
| Up | LRP2     | 26 | 0.007175 | 1907922 | 0.244704 |
| Up | PPP3R1   | 25 | 0.007379 | 2004758 | 0.238896 |
| Up | GPM6A    | 25 | 0.006132 | 2357450 | 0.252902 |
| Up | DCC      | 25 | 0.005345 | 4765410 | 0.221513 |
| Up | SH2D1B   | 24 | 0.004062 | 2069942 | 0.258154 |
| Up | RALA     | 24 | 0.006369 | 2662942 | 0.240114 |
| Up | TNNT1    | 24 | 0.003339 | 2686226 | 0.229663 |
| Up | CXCR2    | 24 | 0.004426 | 2347046 | 0.243684 |
| Up | GCA      | 24 | 0.005351 | 3004102 | 0.238363 |
| Up | SPRYD7   | 24 | 0.005051 | 2103140 | 0.24608  |
| Up | QKI      | 24 | 0.004136 | 1912622 | 0.25378  |
| Up | CFL2     | 24 | 0.003525 | 2115738 | 0.252706 |
| Up | RBM27    | 24 | 0.00478  | 1955316 | 0.243066 |
| Up | PLPPR1   | 23 | 0.00463  | 2162458 | 0.250892 |
| Up | EDNRB    | 23 | 0.005338 | 1258118 | 0.241691 |
| Up | SGPP1    | 23 | 0.005228 | 1293756 | 0.251961 |
| Up | BEX1     | 23 | 0.004242 | 3422062 | 0.245017 |
| Up | TSPAN12  | 22 | 0.001487 | 925910  | 0.220757 |
| Up | CBS      | 22 | 0.005215 | 1234782 | 0.265685 |
| Up | ARHGAP29 | 22 | 0.004421 | 1684386 | 0.251107 |
| Up | PI4K2B   | 22 | 0.004614 | 1768178 | 0.242472 |
| Up | MAP1LC3C | 22 | 0.004982 | 1972584 | 0.229862 |
| Up | B3GALNT1 | 21 | 0.005336 | 1126626 | 0.24     |
| Up | ACP3     | 21 | 0.002576 | 1647834 | 0.228341 |
| Up | HLX      | 21 | 0.006307 | 1362802 | 0.261594 |
| Up | ANKRD1   | 21 | 0.00359  | 2198346 | 0.233347 |
| Up | PEG10    | 21 | 0.004032 | 2364836 | 0.224539 |
| Up | CD244    | 21 | 0.004061 | 2017350 | 0.222391 |
| Up | DACH1    | 21 | 0.003655 | 804372  | 0.236859 |
| Up | MSMO1    | 20 | 0.002071 | 1768042 | 0.209534 |
| Up | FAM241A  | 20 | 0.003537 | 1219752 | 0.213249 |
| Up | SEC14L4  | 20 | 0.002623 | 1149826 | 0.247153 |
| Up | CRTAC1   | 20 | 0.003904 | 1466564 | 0.23377  |
| Up | FADS1    | 19 | 0.002943 | 1095324 | 0.233151 |
| Up | TPD52    | 19 | 0.003137 | 1804230 | 0.233544 |
| Up | MTARC1   | 19 | 0.004099 | 1386362 | 0.236214 |
| Up | FREM2    | 18 | 0.004422 | 1725406 | 0.232391 |
| Up | KANK4    | 18 | 0.00341  | 1391402 | 0.217575 |
| Up | EPAS1    | 18 | 0.00301  | 1633572 | 0.222284 |
| Up | BRINP1   | 17 | 0.002968 | 1345528 | 0.223843 |
| Up | BATF2    | 17 | 0.003047 | 556486  | 0.248602 |
| Up | ABCA3    | 17 | 0.003037 | 1329398 | 0.214625 |
| Up | SPRING1  | 17 | 0.003723 | 1590956 | 0.245222 |
| Up | GPR18    | 2  | 1.51E-04 | 72740   | 0.202397 |
| Up | INSIG1   | 2  | 1.05E-04 | 48156   | 0.212458 |
| Up | BMPR2    | 2  | 0.001074 | 344232  | 0.234519 |
| Up | ASPG     | 2  | 6.00E-06 | 8734    | 0.215977 |
| Up | PIK3AP1  | 1  | 0        | 0       | 0.206597 |
| Up | PNPLA3   | 1  | 0        | 0       | 0.199318 |
| Up | DHCR7    | 1  | 0        | 0       | 0.189076 |

|      |          |     |          |          |          |
|------|----------|-----|----------|----------|----------|
| Up   | RAPGEF6  | 1   | 0        | 0        | 0.195848 |
| Up   | AGER     | 1   | 0        | 0        | 0.212792 |
| Up   | GRIA1    | 1   | 0        | 0        | 0.195944 |
| Up   | ZNF385B  | 1   | 0        | 0        | 0.229634 |
| Up   | SH3GL2   | 1   | 0        | 0        | 0.250971 |
| Up   | EFR3B    | 1   | 0        | 0        | 0.197329 |
| Up   | CLTRN    | 1   | 0        | 0        | 0.195091 |
| Up   | CACNA2D2 | 1   | 0        | 0        | 0.184224 |
| Up   | PDP2     | 1   | 0        | 0        | 0.197259 |
| Up   | C2orf88  | 1   | 0        | 0        | 0.199111 |
| Up   | ORM1     | 1   | 0        | 0        | 0.198919 |
| Up   | PRODH    | 1   | 0        | 0        | 0.20936  |
| Up   | P2RY1    | 1   | 0        | 0        | 0.20186  |
| Up   | FCGR3B   | 1   | 0        | 0        | 0.205946 |
| Up   | HSD17B6  | 1   | 0        | 0        | 0.205946 |
| Up   | VIP      | 1   | 0        | 0        | 0.196603 |
| Up   | ANXA3    | 1   | 0        | 0        | 0.221991 |
| Up   | CACNB4   | 1   | 0        | 0        | 0.218362 |
| Up   | CXCL11   | 1   | 0        | 0        | 0.250971 |
| Up   | CA2      | 1   | 0        | 0        | 0.250971 |
| Up   | IDH1     | 1   | 0        | 0        | 0.250971 |
| Up   | FMO5     | 1   | 0        | 0        | 0.195841 |
| Up   | SP6      | 1   | 0        | 0        | 0.218165 |
| Up   | ANGPTL7  | 1   | 0        | 0        | 0.219163 |
| Up   | SGCG     | 1   | 0        | 0        | 0.22017  |
| Up   | AARD     | 1   | 0        | 0        | 0.210208 |
| Down | KRT15    | 139 | 0.04143  | 17418098 | 0.301727 |
| Down | OTX1     | 135 | 0.030588 | 21151220 | 0.266449 |
| Down | TEKT4    | 112 | 0.032469 | 9352184  | 0.294482 |
| Down | SPAG8    | 103 | 0.036366 | 18673084 | 0.30889  |
| Down | EFHC2    | 102 | 0.023749 | 13739234 | 0.27935  |
| Down | H2AC8    | 83  | 0.024611 | 6197630  | 0.281616 |
| Down | PITX1    | 82  | 0.016303 | 6238340  | 0.280748 |
| Down | ZMYND12  | 81  | 0.016851 | 5737646  | 0.275254 |
| Down | TSGA10   | 79  | 0.014862 | 7614038  | 0.266143 |
| Down | CCDC146  | 75  | 0.015646 | 10846316 | 0.271966 |
| Down | IQUB     | 75  | 0.019032 | 14182898 | 0.288939 |
| Down | PPP1R32  | 74  | 0.01733  | 8946190  | 0.293425 |
| Down | PIH1D2   | 74  | 0.01504  | 6641412  | 0.276652 |
| Down | TRIM29   | 73  | 0.021067 | 12200560 | 0.281131 |
| Down | GPR156   | 69  | 0.0195   | 7611260  | 0.268704 |
| Down | MORN3    | 68  | 0.014673 | 5553112  | 0.286969 |
| Down | KRT13    | 68  | 0.009517 | 8500452  | 0.270945 |
| Down | DEUP1    | 60  | 0.015169 | 5303104  | 0.284296 |
| Down | PKP2     | 58  | 0.018858 | 8281268  | 0.293595 |
| Down | ATP12A   | 55  | 0.016818 | 4886682  | 0.259347 |
| Down | GJB7     | 51  | 0.013598 | 6713456  | 0.24583  |
| Down | SERPINB2 | 46  | 0.01036  | 6281408  | 0.243535 |
| Down | KRT14    | 45  | 0.006234 | 5565110  | 0.256415 |
| Down | RSPH14   | 44  | 0.010927 | 4212324  | 0.278776 |
| Down | FNDC11   | 44  | 0.008116 | 6241718  | 0.264798 |
| Down | RIBC1    | 41  | 0.008105 | 3703944  | 0.268108 |
| Down | GAS2L2   | 40  | 0.007397 | 4935930  | 0.260466 |
| Down | ZG16B    | 39  | 0.010951 | 3230652  | 0.25027  |
| Down | CCDC33   | 39  | 0.005982 | 3754990  | 0.260503 |
| Down | TEKT3    | 38  | 0.005802 | 1893192  | 0.267695 |
| Down | ODAD3    | 36  | 0.005999 | 4403200  | 0.255613 |
| Down | MNS1     | 35  | 0.006885 | 2758774  | 0.274316 |
| Down | LDLRAD1  | 34  | 0.006013 | 1330408  | 0.246167 |
| Down | BAAT     | 34  | 0.006329 | 5346130  | 0.251653 |
| Down | INSYN2A  | 33  | 0.007012 | 3379538  | 0.255307 |
| Down | EPN3     | 32  | 0.006518 | 2340840  | 0.257771 |
| Down | FAM83A   | 32  | 0.004534 | 3671638  | 0.26236  |
| Down | DYDC1    | 32  | 0.003364 | 3009704  | 0.250451 |
| Down | CCDC74B  | 32  | 0.005504 | 5667388  | 0.238999 |
| Down | SLC27A2  | 31  | 0.007914 | 1713272  | 0.248925 |
| Down | SERPINB3 | 31  | 0.00563  | 3936342  | 0.241723 |
| Down | BDKRB1   | 31  | 0.007723 | 2242072  | 0.244607 |
| Down | TTC23L   | 30  | 0.004402 | 3676066  | 0.244252 |
| Down | ZNF474   | 29  | 0.004283 | 1420618  | 0.260466 |

|      |          |    |          |         |          |
|------|----------|----|----------|---------|----------|
| Down | CDC20B   | 29 | 0.004849 | 4072152 | 0.260968 |
| Down | SRGAP3   | 28 | 0.004753 | 3464156 | 0.262745 |
| Down | MAP7D2   | 28 | 0.007073 | 2374110 | 0.256581 |
| Down | EFNB3    | 28 | 0.006063 | 2698100 | 0.235025 |
| Down | CCDC40   | 28 | 0.006637 | 3503538 | 0.226711 |
| Down | LRRIQ1   | 28 | 0.005729 | 2532526 | 0.222365 |
| Down | CFAP53   | 28 | 0.002528 | 2485698 | 0.241744 |
| Down | CNGA3    | 27 | 0.007723 | 1571534 | 0.249249 |
| Down | TMEM231  | 27 | 0.008263 | 3972348 | 0.240634 |
| Down | TMEM184A | 26 | 0.00679  | 1754794 | 0.245721 |
| Down | TEKT1    | 26 | 0.003174 | 1610572 | 0.257103 |
| Down | ZBBX     | 25 | 0.005702 | 1144532 | 0.233779 |
| Down | ZCCHC12  | 25 | 0.005028 | 2186068 | 0.257103 |
| Down | PRMT8    | 24 | 0.00457  | 1815782 | 0.24027  |
| Down | LCA5L    | 24 | 0.002846 | 2152058 | 0.257115 |
| Down | CLCNKA   | 24 | 0.003098 | 1512116 | 0.248925 |
| Down | NGEF     | 24 | 0.004375 | 3394348 | 0.252729 |
| Down | ERICH5   | 23 | 0.005562 | 1589752 | 0.243524 |
| Down | AK8      | 23 | 0.003846 | 3112480 | 0.235803 |
| Down | ARHGAP39 | 23 | 0.005476 | 2447044 | 0.242102 |
| Down | TP73     | 22 | 0.004929 | 2030990 | 0.231838 |
| Down | RIBC2    | 22 | 0.00551  | 1336290 | 0.262434 |
| Down | CFAP100  | 22 | 0.002885 | 2339676 | 0.255648 |
| Down | C20orf85 | 22 | 0.002468 | 2446246 | 0.232401 |
| Down | SLC23A1  | 22 | 0.001624 | 1695110 | 0.244952 |
| Down | FAM166B  | 21 | 0.001975 | 784560  | 0.244402 |
| Down | FAM83B   | 21 | 0.003002 | 2319916 | 0.242176 |
| Down | FOXJ1    | 21 | 0.004882 | 2455478 | 0.228849 |
| Down | FLACC1   | 21 | 0.00364  | 1949842 | 0.238506 |
| Down | CCDC180  | 21 | 0.001999 | 1615478 | 0.225533 |
| Down | CLDN2    | 20 | 0.003773 | 2826512 | 0.233318 |
| Down | CCDC153  | 20 | 0.002082 | 1105816 | 0.23825  |
| Down | LRRC46   | 20 | 0.004517 | 1705482 | 0.220932 |
| Down | DCDC2B   | 19 | 0.002655 | 1759754 | 0.251244 |
| Down | SPDEF    | 19 | 0.004447 | 1360850 | 0.241052 |
| Down | NHLRC4   | 19 | 0.002878 | 652636  | 0.259942 |
| Down | HHATL    | 19 | 0.002887 | 876688  | 0.24028  |
| Down | KIF24    | 19 | 0.002799 | 1332950 | 0.239153 |
| Down | C1orf87  | 18 | 0.004359 | 890600  | 0.27001  |
| Down | TTL10    | 17 | 0.001559 | 1616018 | 0.24407  |
| Down | CCDC17   | 17 | 0.001069 | 1242652 | 0.249933 |
| Down | ODAD4    | 17 | 0.002318 | 1588464 | 0.247483 |
| Down | SPTBN2   | 16 | 0.002395 | 1220708 | 0.232148 |
| Down | SCGB2A1  | 16 | 0.003224 | 1253174 | 0.229076 |
| Down | ZMYND10  | 16 | 0.003082 | 1689944 | 0.230501 |
| Down | ALDH3A1  | 16 | 0.003372 | 1338176 | 0.215725 |
| Down | ELF3     | 16 | 0.001865 | 988574  | 0.247307 |
| Down | SPATA18  | 16 | 0.001743 | 574752  | 0.253733 |
| Down | CATIP    | 16 | 0.001846 | 1647140 | 0.230645 |
| Down | KLHDC8A  | 16 | 0.001582 | 1394580 | 0.226111 |
| Down | BBOX1    | 15 | 0.003124 | 1107474 | 0.218568 |
| Down | SERPINE1 | 15 | 0.002846 | 903206  | 0.248302 |
| Down | OXTR     | 15 | 0.002718 | 884636  | 0.228567 |
| Down | ECT2L    | 15 | 0.003524 | 658760  | 0.249271 |
| Down | ENKUR    | 15 | 0.005566 | 1110698 | 0.286126 |
| Down | LRRC56   | 15 | 0.001547 | 1302402 | 0.246331 |
| Down | DNAAF6   | 15 | 0.003293 | 645306  | 0.241754 |
| Down | HHLA2    | 15 | 0.001132 | 688642  | 0.211407 |
| Down | RAB3B    | 14 | 0.002604 | 635154  | 0.234519 |
| Down | SYT12    | 14 | 0.003878 | 846804  | 0.236808 |
| Down | AKAP14   | 14 | 0.002154 | 875626  | 0.220625 |
| Down | FANK1    | 14 | 0.002044 | 1609636 | 0.245092 |
| Down | TMPRSS4  | 14 | 0.001922 | 1095720 | 0.221673 |
| Down | GJB3     | 13 | 9.78E-04 | 383678  | 0.226692 |
| Down | C21orf58 | 13 | 9.83E-04 | 559838  | 0.259347 |
| Down | PLEKHS1  | 13 | 0.001282 | 1120706 | 0.218577 |
| Down | DQX1     | 13 | 0.002291 | 682462  | 0.211665 |
| Down | SPACA9   | 13 | 0.001535 | 1157462 | 0.225524 |
| Down | CHST6    | 13 | 0.003695 | 1352488 | 0.219709 |
| Down | MAK      | 12 | 0.002266 | 873078  | 0.220022 |

|          |          |        |             |          |           |
|----------|----------|--------|-------------|----------|-----------|
| Down     | CRABP2   | 12     | 0.001367    | 775692   | 0.218148  |
| Down     | DNAJB13  | 12     | 0.002065    | 958372   | 0.224403  |
| Down     | CLDN10   | 12     | 0.00183     | 734174   | 0.218706  |
| Down     | TSNAXIP1 | 12     | 0.002017    | 1063014  | 0.241094  |
| Down     | MORN5    | 12     | 0.001763    | 485166   | 0.23442   |
| Down     | CAPN13   | 12     | 0.001982    | 1168464  | 0.225368  |
| Down     | FUT2     | 2      | 2.74E-04    | 97780    | 0.233044  |
| Down     | DRC7     | 2      | 4.46E-04    | 125252   | 0.235743  |
| Down     | ROPN1L   | 2      | 1.75E-04    | 70850    | 0.223599  |
| Down     | ODAD1    | 1      | 0           | 0        | 0.203584  |
| Down     | ADGB     | 1      | 0           | 0        | 0.219744  |
| Down     | DNAH5    | 1      | 0           | 0        | 0.219744  |
| Down     | FAM83F   | 1      | 0           | 0        | 0.209732  |
| Down     | C22orf15 | 1      | 0           | 0        | 0.20936   |
| Down     | LCNL1    | 1      | 0           | 0        | 0.18605   |
| Down     | COMP     | 1      | 0           | 0        | 0.210399  |
| Down     | ATG9B    | 1      | 0           | 0        | 0.210399  |
| Down     | DNAH3    | 1      | 0           | 0        | 0.218697  |
| Down     | CDHR3    | 1      | 0           | 0        | 0.219587  |
| Down     | IGFL2    | 1      | 0           | 0        | 0.219215  |
| Down     | PACRG    | 1      | 0           | 0        | 0.184818  |
| Down     | ARMC3    | 1      | 0           | 0        | 0.198365  |
| Down     | UBXN10   | 1      | 0           | 0        | 0.250971  |
| Down     | OSCP1    | 1      | 0           | 0        | 0.178701  |
| Down     | RSPH1    | 1      | 0           | 0        | 0.222989  |
| Down     | ZDHHC11  | 1      | 0           | 0        | 0.175773  |
| Down     | CFAP45   | 1      | 0           | 0        | 0.22248   |
| Down     | SPATA17  | 1      | 0           | 0        | 0.218165  |
| Down     | TRIM17   | 1      | 0           | 0        | 0.217422  |
| Down     | SEC14L3  | 1      | 0           | 0        | 0.198181  |
| Down     | SERPINI2 | 1      | 0           | 0        | 0.209281  |
| Down     | SCG5     | 1      | 0           | 0        | 0.207066  |
| Down     | ADH6     | 1      | 0           | 0        | 0.218697  |
| Down     | PLPPR3   | 1      | 0           | 0        | 0.200578  |
| Down     | NME5     | 1      | 0           | 0        | 0.200296  |
| Down     | KLHL32   | 1      | 0           | 0        | 0.236004  |
| Down     | TTC29    | 1      | 0           | 0        | 0.215851  |
| Down     | CD164L2  | 1      | 0           | 0        | 0.211706  |
| Category | Node     | Degree | Betweenness | Stress   | Closeness |
| Up       | LRRK2    | 472    | 0.190674    | 1.06E+08 | 0.335042  |
| Up       | BMI1     | 218    | 0.071143    | 53875450 | 0.298069  |
| Up       | EBP      | 206    | 0.071703    | 29140262 | 0.287384  |
| Up       | MNDA     | 171    | 0.047777    | 41765340 | 0.276267  |
| Up       | KBTBD7   | 126    | 0.040553    | 11107264 | 0.280663  |
| Up       | SH3GL3   | 109    | 0.03146     | 7853178  | 0.292344  |
| Up       | FFAR2    | 108    | 0.022616    | 14923842 | 0.250609  |
| Up       | CAV1     | 104    | 0.035343    | 19955290 | 0.285318  |
| Up       | ARRB1    | 101    | 0.029933    | 15649370 | 0.279899  |
| Up       | MAPT     | 92     | 0.025833    | 13875412 | 0.273937  |
| Up       | MME      | 91     | 0.028261    | 18076366 | 0.26538   |
| Up       | NEK7     | 91     | 0.029626    | 6679066  | 0.279028  |
| Up       | TTN      | 84     | 0.023143    | 10691940 | 0.282317  |
| Up       | TRIB3    | 83     | 0.027033    | 8927188  | 0.29651   |
| Up       | TLCD4    | 80     | 0.016566    | 6890526  | 0.263755  |
| Up       | PARD6B   | 71     | 0.026644    | 5780562  | 0.289526  |
| Up       | UBE2W    | 68     | 0.022196    | 6224972  | 0.277814  |
| Up       | HSPA6    | 68     | 0.016356    | 11408814 | 0.264786  |
| Up       | TMEM97   | 67     | 0.019244    | 6783312  | 0.265102  |
| Up       | CHRM3    | 63     | 0.018624    | 7072284  | 0.27258   |
| Up       | LAMP3    | 63     | 0.020745    | 6535078  | 0.271461  |
| Up       | KHDRBS2  | 63     | 0.014929    | 8785332  | 0.254419  |
| Up       | CAV2     | 62     | 0.0132      | 13037948 | 0.257127  |
| Up       | ASGR2    | 61     | 0.012411    | 9569980  | 0.238486  |
| Up       | IFIT3    | 60     | 0.013739    | 5742008  | 0.274574  |
| Up       | VGLL3    | 59     | 0.006261    | 5614482  | 0.251244  |
| Up       | FAM167A  | 57     | 0.014141    | 8093696  | 0.268952  |
| Up       | SLC33A1  | 56     | 0.015855    | 7425746  | 0.271236  |
| Up       | BDNF     | 56     | 0.016474    | 6042434  | 0.270299  |
| Up       | AATK     | 52     | 0.012964    | 9398450  | 0.24777   |
| Up       | TUBB1    | 51     | 0.013668    | 5348290  | 0.261348  |

|    |          |    |          |         |          |
|----|----------|----|----------|---------|----------|
| Up | NEBL     | 51 | 0.01065  | 8422544 | 0.276693 |
| Up | APOA1    | 51 | 0.013963 | 7094756 | 0.257759 |
| Up | MAP3K21  | 51 | 0.0124   | 8804010 | 0.234549 |
| Up | PLLP     | 49 | 0.018813 | 6150918 | 0.268549 |
| Up | FASN     | 49 | 0.011236 | 8103754 | 0.25936  |
| Up | OLFM4    | 49 | 0.011917 | 7462782 | 0.242366 |
| Up | CYP1A1   | 48 | 0.0126   | 6308186 | 0.249562 |
| Up | HPCAL1   | 48 | 0.013521 | 7156920 | 0.26466  |
| Up | EPB41L5  | 48 | 0.012672 | 7586464 | 0.263855 |
| Up | KLRG2    | 47 | 0.012514 | 3790316 | 0.245363 |
| Up | UBE2D1   | 47 | 0.009859 | 4929052 | 0.25566  |
| Up | MAL2     | 47 | 0.009516 | 7300358 | 0.248591 |
| Up | IER3IP1  | 45 | 0.010479 | 3871278 | 0.248791 |
| Up | SCD      | 44 | 0.008916 | 4647562 | 0.252236 |
| Up | VNN2     | 44 | 0.011702 | 5134620 | 0.248468 |
| Up | SLC25A46 | 44 | 0.008476 | 5268336 | 0.245689 |
| Up | CCR2     | 41 | 0.010649 | 4340172 | 0.261127 |
| Up | TMEM139  | 41 | 0.006307 | 4308482 | 0.234124 |
| Up | SCAMP1   | 40 | 0.008833 | 5807804 | 0.261311 |
| Up | S100A8   | 38 | 0.006992 | 5069398 | 0.256545 |
| Up | LRRC25   | 38 | 0.006222 | 3309428 | 0.226148 |
| Up | SLC1A1   | 37 | 0.010948 | 4480156 | 0.253075 |
| Up | MS4A3    | 37 | 0.003674 | 3888962 | 0.216608 |
| Up | ALPP     | 36 | 0.008295 | 2222676 | 0.248368 |
| Up | EFNB2    | 35 | 0.010959 | 2197494 | 0.265723 |
| Up | MZT1     | 35 | 0.007766 | 3610258 | 0.235234 |
| Up | BTNL8    | 35 | 0.009639 | 1996720 | 0.225817 |
| Up | S100A9   | 34 | 0.005288 | 4106434 | 0.249003 |
| Up | OCLN     | 34 | 0.00856  | 4035020 | 0.255872 |
| Up | HSD17B12 | 33 | 0.006675 | 5796534 | 0.247439 |
| Up | WNT7A    | 32 | 0.008898 | 4194240 | 0.260381 |
| Up | SRP9     | 32 | 0.010153 | 1734654 | 0.281359 |
| Up | TMEM100  | 32 | 0.008166 | 2540638 | 0.253931 |
| Up | CHPT1    | 31 | 0.00693  | 1799108 | 0.243332 |
| Up | SCOC     | 31 | 0.007589 | 2988652 | 0.251984 |
| Up | PRAM1    | 29 | 0.008449 | 3539586 | 0.275145 |
| Up | ANP32E   | 29 | 0.006114 | 3115816 | 0.249843 |
| Up | CD274    | 29 | 0.006097 | 2975198 | 0.220853 |
| Up | PHGDH    | 28 | 0.008161 | 2353820 | 0.275992 |
| Up | ADRA1A   | 28 | 0.004997 | 1951692 | 0.242758 |
| Up | AP1S2    | 28 | 0.007166 | 3086614 | 0.231009 |
| Up | ZMYM1    | 28 | 0.007951 | 2099344 | 0.262757 |
| Up | CDH13    | 27 | 0.005985 | 2659482 | 0.239948 |
| Up | NECAB1   | 27 | 0.004831 | 2711672 | 0.232966 |
| Up | SLC39A8  | 27 | 0.005109 | 2055994 | 0.234252 |
| Up | GATA3    | 26 | 0.003939 | 2670070 | 0.242197 |
| Up | LRP2     | 26 | 0.007175 | 1907922 | 0.244704 |
| Up | PPP3R1   | 25 | 0.007379 | 2004758 | 0.238896 |
| Up | GPM6A    | 25 | 0.006132 | 2357450 | 0.252902 |
| Up | DCC      | 25 | 0.005345 | 4765410 | 0.221513 |
| Up | SH2D1B   | 24 | 0.004062 | 2069942 | 0.258154 |
| Up | RALA     | 24 | 0.006369 | 2662942 | 0.240114 |
| Up | TNNT1    | 24 | 0.003339 | 2686226 | 0.229663 |
| Up | CXCR2    | 24 | 0.004426 | 2347046 | 0.243684 |
| Up | GCA      | 24 | 0.005351 | 3004102 | 0.238363 |
| Up | SPRYD7   | 24 | 0.005051 | 2103140 | 0.24608  |
| Up | QKI      | 24 | 0.004136 | 1912622 | 0.25378  |
| Up | CFL2     | 24 | 0.003525 | 2115738 | 0.252706 |
| Up | RBM27    | 24 | 0.00478  | 1955316 | 0.243066 |
| Up | PLPPR1   | 23 | 0.00463  | 2162458 | 0.250892 |
| Up | EDNRB    | 23 | 0.005338 | 1258118 | 0.241691 |
| Up | SGPP1    | 23 | 0.005228 | 1293756 | 0.251961 |
| Up | BEX1     | 23 | 0.004242 | 3422062 | 0.245017 |
| Up | TSPAN12  | 22 | 0.001487 | 925910  | 0.220757 |
| Up | CBS      | 22 | 0.005215 | 1234782 | 0.265685 |
| Up | ARHGAP29 | 22 | 0.004421 | 1684386 | 0.251107 |
| Up | PI4K2B   | 22 | 0.004614 | 1768178 | 0.242472 |
| Up | MAP1LC3C | 22 | 0.004982 | 1972584 | 0.229862 |
| Up | B3GALNT1 | 21 | 0.005336 | 1126626 | 0.24     |
| Up | ACP3     | 21 | 0.002576 | 1647834 | 0.228341 |

|      |          |     |          |          |          |
|------|----------|-----|----------|----------|----------|
| Up   | HLX      | 21  | 0.006307 | 1362802  | 0.261594 |
| Up   | ANKRD1   | 21  | 0.00359  | 2198346  | 0.233347 |
| Up   | PEG10    | 21  | 0.004032 | 2364836  | 0.224539 |
| Up   | CD244    | 21  | 0.004061 | 2017350  | 0.222391 |
| Up   | DACH1    | 21  | 0.003655 | 804372   | 0.236859 |
| Up   | MSMO1    | 20  | 0.002071 | 1768042  | 0.209534 |
| Up   | FAM241A  | 20  | 0.003537 | 1219752  | 0.213249 |
| Up   | SEC14L4  | 20  | 0.002623 | 1149826  | 0.247153 |
| Up   | CRTAC1   | 20  | 0.003904 | 1466564  | 0.23377  |
| Up   | FADS1    | 19  | 0.002943 | 1095324  | 0.233151 |
| Up   | TPD52    | 19  | 0.003137 | 1804230  | 0.233544 |
| Up   | MTARC1   | 19  | 0.004099 | 1386362  | 0.236214 |
| Up   | FREM2    | 18  | 0.004422 | 1725406  | 0.232391 |
| Up   | KANK4    | 18  | 0.00341  | 1391402  | 0.217575 |
| Up   | EPAS1    | 18  | 0.00301  | 1633572  | 0.222284 |
| Up   | BRINP1   | 17  | 0.002968 | 1345528  | 0.223843 |
| Up   | BATF2    | 17  | 0.003047 | 556486   | 0.248602 |
| Up   | ABCA3    | 17  | 0.003037 | 1329398  | 0.214625 |
| Up   | SPRING1  | 17  | 0.003723 | 1590956  | 0.245222 |
| Up   | GPR18    | 2   | 1.51E-04 | 72740    | 0.202397 |
| Up   | INSIG1   | 2   | 1.05E-04 | 48156    | 0.212458 |
| Up   | BMPR2    | 2   | 0.001074 | 344232   | 0.234519 |
| Up   | ASPG     | 2   | 6.00E-06 | 8734     | 0.215977 |
| Up   | PIK3AP1  | 1   | 0        | 0        | 0.206597 |
| Up   | PNPLA3   | 1   | 0        | 0        | 0.199318 |
| Up   | DHCR7    | 1   | 0        | 0        | 0.189076 |
| Up   | RAPGEF6  | 1   | 0        | 0        | 0.195848 |
| Up   | AGER     | 1   | 0        | 0        | 0.212792 |
| Up   | GRIA1    | 1   | 0        | 0        | 0.195944 |
| Up   | ZNF385B  | 1   | 0        | 0        | 0.229634 |
| Up   | SH3GL2   | 1   | 0        | 0        | 0.250971 |
| Up   | EFR3B    | 1   | 0        | 0        | 0.197329 |
| Up   | CLTRN    | 1   | 0        | 0        | 0.195091 |
| Up   | CACNA2D2 | 1   | 0        | 0        | 0.184224 |
| Up   | PDP2     | 1   | 0        | 0        | 0.197259 |
| Up   | C2orf88  | 1   | 0        | 0        | 0.199111 |
| Up   | ORM1     | 1   | 0        | 0        | 0.198919 |
| Up   | PRODH    | 1   | 0        | 0        | 0.20936  |
| Up   | P2RY1    | 1   | 0        | 0        | 0.20186  |
| Up   | FCGR3B   | 1   | 0        | 0        | 0.205946 |
| Up   | HSD17B6  | 1   | 0        | 0        | 0.205946 |
| Up   | VIP      | 1   | 0        | 0        | 0.196603 |
| Up   | ANXA3    | 1   | 0        | 0        | 0.221991 |
| Up   | CACNB4   | 1   | 0        | 0        | 0.218362 |
| Up   | CXCL11   | 1   | 0        | 0        | 0.250971 |
| Up   | CA2      | 1   | 0        | 0        | 0.250971 |
| Up   | ID1I     | 1   | 0        | 0        | 0.250971 |
| Up   | FMO5     | 1   | 0        | 0        | 0.195841 |
| Up   | SP6      | 1   | 0        | 0        | 0.218165 |
| Up   | ANGPTL7  | 1   | 0        | 0        | 0.219163 |
| Up   | SGCG     | 1   | 0        | 0        | 0.22017  |
| Up   | AARD     | 1   | 0        | 0        | 0.210208 |
| Down | KRT15    | 139 | 0.04143  | 17418098 | 0.301727 |
| Down | OTX1     | 135 | 0.030588 | 21151220 | 0.266449 |
| Down | TEKT4    | 112 | 0.032469 | 9352184  | 0.294482 |
| Down | SPAG8    | 103 | 0.036366 | 18673084 | 0.30889  |
| Down | EFHC2    | 102 | 0.023749 | 13739234 | 0.27935  |
| Down | H2AC8    | 83  | 0.024611 | 6197630  | 0.281616 |
| Down | PITX1    | 82  | 0.016303 | 6238340  | 0.280748 |
| Down | ZMYND12  | 81  | 0.016851 | 5737646  | 0.275254 |
| Down | TSGA10   | 79  | 0.014862 | 7614038  | 0.266143 |
| Down | CCDC146  | 75  | 0.015646 | 10846316 | 0.271966 |
| Down | IQUB     | 75  | 0.019032 | 14182898 | 0.288939 |
| Down | PPP1R32  | 74  | 0.01733  | 8946190  | 0.293425 |
| Down | PIH1D2   | 74  | 0.01504  | 6641412  | 0.276652 |
| Down | TRIM29   | 73  | 0.021067 | 12200560 | 0.281131 |
| Down | GPR156   | 69  | 0.0195   | 7611260  | 0.268704 |
| Down | MORN3    | 68  | 0.014673 | 5553112  | 0.286969 |
| Down | KRT13    | 68  | 0.009517 | 8500452  | 0.270945 |
| Down | DEUP1    | 60  | 0.015169 | 5303104  | 0.284296 |

|      |          |    |          |         |          |
|------|----------|----|----------|---------|----------|
| Down | PKP2     | 58 | 0.018858 | 8281268 | 0.293595 |
| Down | ATP12A   | 55 | 0.016818 | 4886682 | 0.259347 |
| Down | GJB7     | 51 | 0.013598 | 6713456 | 0.24583  |
| Down | SERPINB2 | 46 | 0.01036  | 6281408 | 0.243535 |
| Down | KRT14    | 45 | 0.006234 | 5565110 | 0.256415 |
| Down | RSPH14   | 44 | 0.010927 | 4212324 | 0.278776 |
| Down | FNDC11   | 44 | 0.008116 | 6241718 | 0.264798 |
| Down | RIBC1    | 41 | 0.008105 | 3703944 | 0.268108 |
| Down | GAS2L2   | 40 | 0.007397 | 4935930 | 0.260466 |
| Down | ZG16B    | 39 | 0.010951 | 3230652 | 0.25027  |
| Down | CCDC33   | 39 | 0.005982 | 3754990 | 0.260503 |
| Down | TEKT3    | 38 | 0.005802 | 1893192 | 0.267695 |
| Down | ODAD3    | 36 | 0.005999 | 4403200 | 0.255613 |
| Down | MNS1     | 35 | 0.006885 | 2758774 | 0.274316 |
| Down | LDLRAD1  | 34 | 0.006013 | 1330408 | 0.246167 |
| Down | BAAT     | 34 | 0.006329 | 5346130 | 0.251653 |
| Down | INSYN2A  | 33 | 0.007012 | 3379538 | 0.255307 |
| Down | EPN3     | 32 | 0.006518 | 2340840 | 0.257771 |
| Down | FAM83A   | 32 | 0.004534 | 3671638 | 0.26236  |
| Down | DYDC1    | 32 | 0.003364 | 3009704 | 0.250451 |
| Down | CCDC74B  | 32 | 0.005504 | 5667388 | 0.238999 |
| Down | SLC27A2  | 31 | 0.007914 | 1713272 | 0.248925 |
| Down | SERPINB3 | 31 | 0.00563  | 3936342 | 0.241723 |
| Down | BDKRB1   | 31 | 0.007723 | 2242072 | 0.244607 |
| Down | TTC23L   | 30 | 0.004402 | 3676066 | 0.244252 |
| Down | ZNF474   | 29 | 0.004283 | 1420618 | 0.260466 |
| Down | CDC20B   | 29 | 0.004849 | 4072152 | 0.260968 |
| Down | SRGAP3   | 28 | 0.004753 | 3464156 | 0.262745 |
| Down | MAP7D2   | 28 | 0.007073 | 2374110 | 0.256581 |
| Down | EFNB3    | 28 | 0.006063 | 2698100 | 0.235025 |
| Down | CCDC40   | 28 | 0.006637 | 3503538 | 0.226711 |
| Down | LRR1Q1   | 28 | 0.005729 | 2532526 | 0.222365 |
| Down | CFAP53   | 28 | 0.002528 | 2485698 | 0.241744 |
| Down | CNGA3    | 27 | 0.007723 | 1571534 | 0.249249 |
| Down | TMEM231  | 27 | 0.008263 | 3972348 | 0.240634 |
| Down | TMEM184A | 26 | 0.00679  | 1754794 | 0.245721 |
| Down | TEKT1    | 26 | 0.003174 | 1610572 | 0.257103 |
| Down | ZBBX     | 25 | 0.005702 | 1144532 | 0.233779 |
| Down | ZCCHC12  | 25 | 0.005028 | 2186068 | 0.257103 |
| Down | PRMT8    | 24 | 0.00457  | 1815782 | 0.24027  |
| Down | LCA5L    | 24 | 0.002846 | 2152058 | 0.257115 |
| Down | CLCNKA   | 24 | 0.003098 | 1512116 | 0.248925 |
| Down | NGEF     | 24 | 0.004375 | 3394348 | 0.252729 |
| Down | ERICH5   | 23 | 0.005562 | 1589752 | 0.243524 |
| Down | AK8      | 23 | 0.003846 | 3112480 | 0.235803 |
| Down | ARHGAP39 | 23 | 0.005476 | 2447044 | 0.242102 |
| Down | TP73     | 22 | 0.004929 | 2030990 | 0.231838 |
| Down | RIBC2    | 22 | 0.00551  | 1336290 | 0.262434 |
| Down | CFAP100  | 22 | 0.002885 | 2339676 | 0.255648 |
| Down | C20orf85 | 22 | 0.002468 | 2446246 | 0.232401 |
| Down | SLC23A1  | 22 | 0.001624 | 1695110 | 0.244952 |
| Down | FAM166B  | 21 | 0.001975 | 784560  | 0.244402 |
| Down | FAM83B   | 21 | 0.003002 | 2319916 | 0.242176 |
| Down | FOXJ1    | 21 | 0.004882 | 2455478 | 0.228849 |
| Down | FLACC1   | 21 | 0.00364  | 1949842 | 0.238506 |
| Down | CCDC180  | 21 | 0.001999 | 1615478 | 0.225533 |
| Down | CLDN2    | 20 | 0.003773 | 2826512 | 0.233318 |
| Down | CCDC153  | 20 | 0.002082 | 1105816 | 0.23825  |
| Down | LRRC46   | 20 | 0.004517 | 1705482 | 0.220932 |
| Down | DCDC2B   | 19 | 0.002655 | 1759754 | 0.251244 |
| Down | SPDEF    | 19 | 0.004447 | 1360850 | 0.241052 |
| Down | NHLRC4   | 19 | 0.002878 | 652636  | 0.259942 |
| Down | HHATL    | 19 | 0.002887 | 876688  | 0.24028  |
| Down | KIF24    | 19 | 0.002799 | 1332950 | 0.239153 |
| Down | C1orf87  | 18 | 0.004359 | 890600  | 0.27001  |
| Down | TTLL10   | 17 | 0.001559 | 1616018 | 0.24407  |
| Down | CCDC17   | 17 | 0.001069 | 1242652 | 0.249933 |
| Down | ODAD4    | 17 | 0.002318 | 1588464 | 0.247483 |
| Down | SPTBN2   | 16 | 0.002395 | 1220708 | 0.232148 |
| Down | SCGB2A1  | 16 | 0.003224 | 1253174 | 0.229076 |

|      |          |    |          |         |          |
|------|----------|----|----------|---------|----------|
| Down | ZMYND10  | 16 | 0.003082 | 1689944 | 0.230501 |
| Down | ALDH3A1  | 16 | 0.003372 | 1338176 | 0.215725 |
| Down | ELF3     | 16 | 0.001865 | 988574  | 0.247307 |
| Down | SPATA18  | 16 | 0.001743 | 574752  | 0.253733 |
| Down | CATIP    | 16 | 0.001846 | 1647140 | 0.230645 |
| Down | KLHDC8A  | 16 | 0.001582 | 1394580 | 0.226111 |
| Down | BBOX1    | 15 | 0.003124 | 1107474 | 0.218568 |
| Down | SERPINE1 | 15 | 0.002846 | 903206  | 0.248302 |
| Down | OXTR     | 15 | 0.002718 | 884636  | 0.228567 |
| Down | ECT2L    | 15 | 0.003524 | 658760  | 0.249271 |
| Down | ENKUR    | 15 | 0.005566 | 1110698 | 0.286126 |
| Down | LRRC56   | 15 | 0.001547 | 1302402 | 0.246331 |
| Down | DNAAF6   | 15 | 0.003293 | 645306  | 0.241754 |
| Down | HHLA2    | 15 | 0.001132 | 688642  | 0.211407 |
| Down | RAB3B    | 14 | 0.002604 | 635154  | 0.234519 |
| Down | SYT12    | 14 | 0.003878 | 846804  | 0.236808 |
| Down | AKAP14   | 14 | 0.002154 | 875626  | 0.220625 |
| Down | FANK1    | 14 | 0.002044 | 1609636 | 0.245092 |
| Down | TMPRSS4  | 14 | 0.001922 | 1095720 | 0.221673 |
| Down | GJB3     | 13 | 9.78E-04 | 383678  | 0.226692 |
| Down | C21orf58 | 13 | 9.83E-04 | 559838  | 0.259347 |
| Down | PLEKHS1  | 13 | 0.001282 | 1120706 | 0.218577 |
| Down | DQX1     | 13 | 0.002291 | 682462  | 0.211665 |
| Down | SPACA9   | 13 | 0.001535 | 1157462 | 0.225524 |
| Down | CHST6    | 13 | 0.003695 | 1352488 | 0.219709 |
| Down | MAK      | 12 | 0.002266 | 873078  | 0.220022 |
| Down | CRABP2   | 12 | 0.001367 | 775692  | 0.218148 |
| Down | DNAJB13  | 12 | 0.002065 | 958372  | 0.224403 |
| Down | CLDN10   | 12 | 0.00183  | 734174  | 0.218706 |
| Down | TSNAXIP1 | 12 | 0.002017 | 1063014 | 0.241094 |
| Down | MORN5    | 12 | 0.001763 | 485166  | 0.23442  |
| Down | CAPN13   | 12 | 0.001982 | 1168464 | 0.225368 |
| Down | FUT2     | 2  | 2.74E-04 | 97780   | 0.233044 |
| Down | DRC7     | 2  | 4.46E-04 | 125252  | 0.235743 |
| Down | ROPN1L   | 2  | 1.75E-04 | 70850   | 0.223599 |
| Down | ODAD1    | 1  | 0        | 0       | 0.203584 |
| Down | ADGB     | 1  | 0        | 0       | 0.219744 |
| Down | DNAH5    | 1  | 0        | 0       | 0.219744 |
| Down | FAM83F   | 1  | 0        | 0       | 0.209732 |
| Down | C22orf15 | 1  | 0        | 0       | 0.20936  |
| Down | LCNL1    | 1  | 0        | 0       | 0.18605  |
| Down | COMP     | 1  | 0        | 0       | 0.210399 |
| Down | ATG9B    | 1  | 0        | 0       | 0.210399 |
| Down | DNAH3    | 1  | 0        | 0       | 0.218697 |
| Down | CDHR3    | 1  | 0        | 0       | 0.219587 |
| Down | IGFL2    | 1  | 0        | 0       | 0.219215 |
| Down | PACRG    | 1  | 0        | 0       | 0.184818 |
| Down | ARMC3    | 1  | 0        | 0       | 0.198365 |
| Down | UBXN10   | 1  | 0        | 0       | 0.250971 |
| Down | OSCP1    | 1  | 0        | 0       | 0.178701 |
| Down | RSPH1    | 1  | 0        | 0       | 0.222989 |
| Down | ZDHHC11  | 1  | 0        | 0       | 0.175773 |
| Down | CFAP45   | 1  | 0        | 0       | 0.22248  |
| Down | SPATA17  | 1  | 0        | 0       | 0.218165 |
| Down | TRIM17   | 1  | 0        | 0       | 0.217422 |
| Down | SEC14L3  | 1  | 0        | 0       | 0.198181 |
| Down | SERPINI2 | 1  | 0        | 0       | 0.209281 |
| Down | SCG5     | 1  | 0        | 0       | 0.207066 |
| Down | ADH6     | 1  | 0        | 0       | 0.218697 |
| Down | PLPPR3   | 1  | 0        | 0       | 0.200578 |
| Down | NME5     | 1  | 0        | 0       | 0.200296 |
| Down | KLHL32   | 1  | 0        | 0       | 0.236004 |
| Down | TTC29    | 1  | 0        | 0       | 0.215851 |
| Down | CD164L2  | 1  | 0        | 0       | 0.211706 |



**Table S5** Candidate miRNA and TFs targeted by the hub genes.

| Regulation | Hub Genes | Degree | MicroRNA         | Regulation | Hub Genes | Degree | TF     |
|------------|-----------|--------|------------------|------------|-----------|--------|--------|
| Up         | PARD6B    | 217    | hsa-mir-6830-5p  | Up         | CAV1      | 16     | NFYA   |
| Up         | NEK7      | 156    | hsa-mir-362-3p   | Up         | TTN       | 11     | SRF    |
| Up         | BMI1      | 115    | hsa-mir-15b      | Up         | MAPT      | 11     | TFAP2A |
| Up         | CAV1      | 115    | hsa-mir-766-5p   | Up         | TRIB3     | 10     | EN1    |
| Up         | TRIB3     | 80     | hsa-mir-8057     | Up         | NEK7      | 9      | ELK4   |
| Up         | MME       | 54     | hsa-mir-526a     | Up         | MME       | 9      | BRCA1  |
| Up         | ARRB1     | 52     | hsa-mir-6804-5p  | Up         | KBTBD7    | 9      | ARID3A |
| Up         | MAPT      | 45     | hsa-mir-2276-3p  | Up         | PARD6B    | 9      | GATA2  |
| Up         | KBTBD7    | 40     | hsa-mir-4743-3p  | Up         | EBP       | 8      | YY1    |
| Up         | TTN       | 31     | hsa-mir-641      | Up         | LRRK2     | 8      | CEBPB  |
| Up         | FFAR2     | 24     | hsa-mir-6787-3p  | Up         | ARRB1     | 8      | FOXA1  |
| Up         | EBP       | 17     | hsa-mir-16-5p    | Up         | FFAR2     | 7      | PRRX2  |
| Up         | LRRK2     | 14     | hsa-mir-10b-5p   | Up         | MNDA      | 6      | STAT3  |
| Up         | MNDA      | 7      | hsa-mir-181d-5p  | Up         | BMI1      | 6      | EGR1   |
| Up         | SH3GL3    | 7      | hsa-mir-374a-5p  | Up         | SH3GL3    | 5      | IRF2   |
| Down       | GPR156    | 42     | hsa-mir-302a-3p  | Down       | TSGA10    | 12     | JUN    |
| Down       | PITX1     | 39     | hsa-mir-19b-3p   | Down       | IQUB      | 9      | STAT1  |
| Down       | TRIM29    | 27     | hsa-mir-4524a-3p | Down       | MORN3     | 9      | MEF2A  |
| Down       | OTX1      | 24     | hsa-mir-1537-5p  | Down       | OTX1      | 9      | TP53   |
| Down       | CCDC146   | 11     | hsa-mir-941      | Down       | CCDC146   | 8      | NFKB1  |
| Down       | EFHC2     | 11     | hsa-mir-4443     | Down       | EFHC2     | 7      | HINFP  |
| Down       | TSGA10    | 10     | hsa-mir-210-3p   | Down       | GPR156    | 7      | JUND   |
| Down       | KRT15     | 10     | hsa-mir-124-3p   | Down       | SPAG8     | 7      | SREBF1 |
| Down       | PIH1D2    | 7      | hsa-mir-194-5p   | Down       | PITX1     | 6      | POU2F2 |
| Down       | ZMYND12   | 6      | hsa-mir-147a     | Down       | TRIM29    | 5      | RELA   |
| Down       | IQUB      | 5      | hsa-mir-34a-5p   | Down       | ZMYND12   | 5      | NRF1   |
| Down       | MORN3     | 3      | hsa-mir-4747-3p  | Down       | TEKT4     | 5      | TFAP2C |
| Down       | TEKT4     | 2      | hsa-mir-31-5p    | Down       | PIH1D2    | 4      | FOS    |
| Down       | SPAG8     | 2      | hsa-mir-373-3p   | Down       | PPP1R32   | 3      | FOXC1  |
| Down       | PPP1R32   | 1      | hsa-mir-1-3p     | Down       | KRT15     | 3      | SOX5   |

**Table S6** Candidate drugs targeted by the hub genes

| Category | DEGs    | Degree | Drug                                |
|----------|---------|--------|-------------------------------------|
| Up       | CA2     | 95     | Cyclothiazide                       |
| Up       | ADRA1A  | 89     | Tetryzoline                         |
| Up       | CHRM1   | 86     | Fesoterodine                        |
| Up       | CHRM2   | 72     | Triflupromazine                     |
| Up       | CHRM3   | 67     | Methacholine                        |
| Up       | ADRB1   | 57     | Dobutamine                          |
| Up       | SLC6A4  | 56     | Protriptyli                         |
| Up       | CA4     | 17     | Methazolamide                       |
| Up       | GRIA1   | 10     | Enflurane                           |
| Up       | SCN1A   | 10     | Phenazopyridine                     |
| Up       | TNNC1   | 8      | Bepridil                            |
| Up       | SLC7A11 | 5      | L-Cystine                           |
| Up       | ADH1A   | 4      | N-Cyclopentyl-N-Cyclobutylformamide |
| Up       | ORM1    | 3      | Chlorpromazine                      |
| Up       | ORM2    | 3      | Thalidomide                         |
| Up       | SLC1A1  | 2      | L-Aspartic Acid                     |

|      |         |    |                  |
|------|---------|----|------------------|
| Up   | NDUFC2  | 2  | Carvedilol       |
| Up   | GPR18   | 1  | Glycine          |
| Up   | DHCR7   | 1  | NADH             |
| Up   | PHGDH   | 1  | NADH             |
| Up   | ALDH6A1 | 1  | NADH             |
| Up   | GPD1    | 1  | NADH             |
| Up   | MSMO1   | 1  | NADH             |
| Up   | BDNF    | 1  | CX717            |
| Down | DRD5    | 26 | Rotigotine       |
| Down | GRIK2   | 21 | Hexobarbital     |
| Down | GRIN3B  | 15 | Atomoxetine      |
| Down | MB      | 12 | Methylethylamine |
| Down | LGSN    | 1  | L-Glutamic Acid  |
| Down | GRM7    | 1  | L-Glutamic Acid  |
| Down | BAAT    | 1  | Glycine          |
| Down | COMP    | 1  | Calcium          |

---
